# Supplementary material
Source: PubMed Central journal article supplement (PMC9218931)
Supplement: jamapsychiatry-e221513-s001.pdf [file jamapsychiatry-e221513-s001.pdf]

## Supplemental Online Content

Tseng PT, Zeng BS, Hung CM, et al. Assessment of noninvasive brain stimulation interventions for negative symptoms of schizophrenia: a systematic review and network meta-analysis. *JAMA Psychiatry*. Published online June 22, 2022. doi:10.1001/jamapsychiatry.2022.1513

### **eMethods.**

**eTable 1.** PRISMA 2020 checklist of current network meta-analysis

**eTable 2.** Keywords in each database and search result

**eTable 3.** Excluded studies and reason

**eTable 4.** Characteristics of the included studies

**eTable 5.** SUCRA of the improvement of symptoms and tolerability in aspect of drop-out rate

**eTable 6.** League table of the improvement of symptoms

**eTable 7.** Inconsistency of different intervention

**eTable 8.** Estimated between-studies standard deviation of different outcome and between-treatment heterogeneity

**eTable 9.** Quality of evidence for primary outcomes

**eTable 10.** League table of the improvement of negative symptoms and tolerability in aspect of drop-out rate

**eFigure 1.** Test for transitivity assumption: changes in negative symptoms

**eFigure 2.** Network structure of primary and secondary outcomes

**eFigure 3.** Forest plot of primary and secondary outcomes

**eFigure 4.** Overview and detailed risk of bias

**eFigure 5.** Funnel plot and Egger regression of primary and secondary outcomes and funnel plot of acceptability

**eFigure 6.** Heatmap diagram representation of primary outcomes and tolerability in aspect of drop-out rate

### **eReferences**

This supplemental material has been provided by the authors to give readers additional information about their work.

## **eMethods.**

### *General study guidelines*

This NMA was conducted in accordance with the extended 2020 version of the Preferred Reporting Items for Systematic Reviews and Meta-Analyses Guidelines (eTable 1).<sup>1</sup> The current study was approved by the Institutional Review Board of the Tri-Service General Hospital, National Defense Medical Center (TSGHIRB No. B-109–29), and was a priori registered in PROSPERO (CRD42022296839).

### *NMA objectives*

The present study compared the effects of different NIBS methods and protocols on the severity of negative symptoms among participants with schizophrenia. The PICO (population, intervention, comparison, outcome) setting of the NMA was as follows: (1) P: patients with an established diagnosis of schizophrenia; (2) I: treatment with a NIBS intervention (at least five sessions), including rTMS, TBS, tRNS, tVNS, or tDCS; (3) C: the results of the active interventions were compared with those of sham control groups; and (4) O: change in the severity of negative symptoms. Only RCTs investigating changes in negative symptoms after NIBS as their primary or secondary outcomes were deemed eligible for inclusion in the NMA. For RCTs employing a crossover design, we extracted outcomes before the crossover procedure to avoid potential carry-over effects.

### *Search strategy and screening process*

The keywords applied in the search strategy were as follows: (deep transcranial magnetic stimulation OR dTMS OR repetitive transcranial magnetic stimulation OR rTMS OR TMS OR non-invasive brain stimulation OR theta-burst stimulation OR transcranial direct current stimulation OR TBS OR tDCS OR vagus nerve stimulation OR vagal nerve stimulation OR tVNS OR nVNS OR VNS OR static magnetic field stimulation OR tSMS) AND (negative symptoms OR anhedonia OR alogia OR asociality OR avolition OR apathy) AND (schizophrenia OR schizophrenic disorder) AND (random OR randomized OR randomised). We searched the ClinicalKey, Cochrane CENTRAL, EMBASE, ProQuest, PubMed, ScienceDirect, and Web of Science databases for RCTs from inception through December 7, 2021 (for the detailed search strategy, please see eTable 2). To assess gray literature and unpublished studies, we searched ClinicalTrials.gov. No language restrictions were applied. The search strategy was further augmented by the manual search of the reference lists of eligible articles as well as previous review articles and pairwise meta-analyses on this topic.<sup>2-21</sup> The overall screening and selection strategy included two stages. The first stage comprised title and abstract screening, and the second was full-text screening and selection.

### *Eligibility criteria*

To adhere to transitivity assumptions and reduce heterogeneity across the included studies, we applied stringent inclusion criteria: (1) RCTs, (2) application of NIBS interventions, (3) participants recruited with an established diagnosis of schizophrenia, and (4) studies comparing the efficacy of different NIBS strategies to manage participants' negative symptoms.

Studies were excluded if they (1) were not RCTs, (2) did not provide a measure of the severity of negative symptoms, (3) were not related to NIBS, (4) did not recruit participants with schizophrenia, or (5) applied less than five sessions of NIBS stimulation. In cases of duplicate reporting (i.e., different articles based on the same sample), we included only the article with the largest sample size.

### *Data extraction*

Two authors independently screened references, extracted relevant information from the manuscripts, and evaluated the risk of bias of the included studies. Disagreements were resolved either through consensus or discussion with a third investigator. Whenever available data were lacking in the original manuscripts, their corresponding authors or coauthors were contacted to obtain the full original data in at least two occasions over a one-week period. We followed a flowchart in accordance with the procedures of other NMAs.<sup>22-29</sup> The nomenclature of the brain mapping was based on 10–20 electroencephalography mapping (i.e., F3 for left DLPFC, Fp1 for left vmPFC, and F4 for right DLPFC). The nomenclature and classification of the treatment arms were named according to our previous six NMAs on NIBS approaches for other conditions.<sup>26-31</sup>

### *Outcomes*

The co-primary outcomes were (1) changes in the scores of negative symptoms after NIBS management relative to the sham control and (2) acceptability (i.e., withdrawal for any reason). The dropout rate was defined when patients left the study for any reason before the study's completion. The choice of co-primary outcomes was based on widely accepted rationales from other NMAs investigating NIBS.<sup>27,32</sup> The secondary outcomes included changes in positive symptoms and depression severity. We considered the latest outcomes available in each eligible RCT to account for any possible delayed beneficial effects of NIBS on negative symptoms.<sup>33</sup>

### *Bias assessment*

Two authors independently evaluated the risk of bias (interrater reliability = 0.87) for each domain included in the Cochrane risk of bias tool. We assessed the risk of bias in accordance with the Cochrane risk of bias tool; specifically, the item “other bias” was assessed for any potential bias not addressed by the existing risk of bias items.<sup>34</sup> We choose to use the original version of risk of bias tool rather than the Risk of Bias 2 tool because the former is relatively more intuitive than the later for the ordinary clinicians, which were the targeted audience of this study.

### *Statistical analysis*

The NMA was performed using STATA (version 16.0; StataCorp, College Station, TX, USA). We employed the *mvmeta* command in STATA.<sup>35</sup> For continuous variables, we estimated the standardized mean differences (SMDs) with 95% confidence intervals (95%CI). For acceptability (dropout rate), we estimated the odds ratios and 95%CIs. As required by the *mvmeta* command in STATA, we applied a 0.5 zero-cell correction during the meta-analysis if a study had zero events in either the intervention or control arm. However, if a study had zeros in both the intervention and control arms, we did not perform a correction procedure because of the risk of increasing the bias; instead, we excluded these studies from our analysis.<sup>36,37</sup> All pairwise meta-analyses and NMA procedures were conducted using random-effects and frequentist models, respectively. Heterogeneity among the included studies was evaluated using the tau value, which is the estimated standard deviation of the effect across the included studies. All comparisons were performed using a two-tailed test, and *P* values of <0.05 were considered statistically significant.

This study used a mixed comparison with generalized linear mixed models to analyze direct and indirect comparisons in the NMA.<sup>38</sup> Specifically, indirect comparisons were conducted using transitivity, meaning that differences between treatments A and B could be calculated from their comparisons with a third treatment, C. To compare multiple treatment arms, this study combined the direct and indirect evidence of the included studies.<sup>39</sup> The restricted maximum likelihood method was used to evaluate the variance between the studies.<sup>40</sup> To provide additional clinical applications, this study calculated the relative ranking probabilities of the effects of all treatments on the target outcomes. In brief, the surface under the cumulative ranking curve (SUCRA) indicated the percentage of the mean rank of each intervention relative to an imaginary intervention that was optimal without uncertainty.<sup>41</sup> This study used comparison-adjusted funnel plots and Egger’s regression to evaluate potentially small study effects and publication bias.

In addition, this study evaluated potential inconsistencies between the direct and indirect evidence within the network by using the loop-specific approach and local inconsistencies by performing node splitting. This study also used the design-by-treatment model to evaluate global inconsistency

across the NMA.<sup>42</sup> We followed Cochrane Handbook for GRADE ratings in BMJ<sup>43</sup> and one important network meta-analysis in Lancet<sup>44</sup> for quality assessment.

Finally, in line with the rationale of another NMA study,<sup>29</sup> this study assessed the effectiveness of the different sham interventions (i.e., changes in negative symptom severity) or waiting-list controls to justify our assumption of transitivity. Specifically, this study computed the changes in negative symptom severity relative to tDCS sham therapy, rTMS sham therapy, and waiting-list controls by using Comprehensive Meta-Analysis (version 3; Biostat, Englewood, NJ, USA). Furthermore, this study conducted subgroup analyses focusing on RCTs with definite diagnostic criteria for schizophrenia.

**eTable 1: PRISMA 2020 checklist of current network meta-analysis**

| Section and Topic             | Item # | Checklist item                                                                                                                                                                                                                                                                                       | Page where item is reported |
|-------------------------------|--------|------------------------------------------------------------------------------------------------------------------------------------------------------------------------------------------------------------------------------------------------------------------------------------------------------|-----------------------------|
| <b>TITLE</b>                  |        |                                                                                                                                                                                                                                                                                                      |                             |
| Title                         | 1      | Identify the report as a systematic review.                                                                                                                                                                                                                                                          | 1                           |
| <b>ABSTRACT</b>               |        |                                                                                                                                                                                                                                                                                                      |                             |
| Abstract                      | 2      | See the PRISMA 2020 for Abstracts checklist.                                                                                                                                                                                                                                                         | 9-10                        |
| <b>INTRODUCTION</b>           |        |                                                                                                                                                                                                                                                                                                      |                             |
| Rationale                     | 3      | Describe the rationale for the review in the context of existing knowledge.                                                                                                                                                                                                                          | 13-14                       |
| Objectives                    | 4      | Provide an explicit statement of the objective(s) or question(s) the review addresses.                                                                                                                                                                                                               | 14-15                       |
| <b>METHODS</b>                |        |                                                                                                                                                                                                                                                                                                      |                             |
| Eligibility criteria          | 5      | Specify the inclusion and exclusion criteria for the review and how studies were grouped for the syntheses.                                                                                                                                                                                          | 16-17, appendix             |
| Information sources           | 6      | Specify all databases, registers, websites, organisations, reference lists and other sources searched or consulted to identify studies. Specify the date when each source was last searched or consulted.                                                                                            | 16-17, appendix             |
| Search strategy               | 7      | Present the full search strategies for all databases, registers and websites, including any filters and limits used.                                                                                                                                                                                 | 16-17, appendix             |
| Selection process             | 8      | Specify the methods used to decide whether a study met the inclusion criteria of the review, including how many reviewers screened each record and each report retrieved, whether they worked independently, and if applicable, details of automation tools used in the process.                     | 16-17, appendix             |
| Data collection process       | 9      | Specify the methods used to collect data from reports, including how many reviewers collected data from each report, whether they worked independently, any processes for obtaining or confirming data from study investigators, and if applicable, details of automation tools used in the process. | 16-17, appendix             |
| Data items                    | 10a    | List and define all outcomes for which data were sought. Specify whether all results that were compatible with each outcome domain in each study were sought (e.g. for all measures, time points, analyses), and if not, the methods used to decide which results to collect.                        | 16-17, appendix             |
|                               | 10b    | List and define all other variables for which data were sought (e.g. participant and intervention characteristics, funding sources). Describe any assumptions made about any missing or unclear information.                                                                                         | 16-17, appendix             |
| Study risk of bias assessment | 11     | Specify the methods used to assess risk of bias in the included studies, including details of the tool(s) used, how many reviewers assessed each study and whether they worked independently, and if applicable, details of automation tools used in the process.                                    | 16-17, appendix             |
| Effect measures               | 12     | Specify for each outcome the effect measure(s) (e.g. risk ratio, mean difference) used in the synthesis or presentation of results.                                                                                                                                                                  | 16-17, appendix             |
| Synthesis methods             | 13a    | Describe the processes used to decide which studies were eligible for each synthesis (e.g. tabulating the study intervention characteristics and comparing against the planned groups for each synthesis (item #5)).                                                                                 | 16-17, appendix             |
|                               | 13b    | Describe any methods required to prepare the data for presentation or synthesis, such as handling of missing summary statistics, or data conversions.                                                                                                                                                | 16-17, appendix             |
|                               | 13c    | Describe any methods used to tabulate or visually display results of individual studies and syntheses.                                                                                                                                                                                               | 16-17, appendix             |
|                               | 13d    | Describe any methods used to synthesize results and provide a rationale for the choice(s). If meta-analysis was performed, describe the model(s), method(s) to identify the presence and extent of statistical heterogeneity, and software package(s) used.                                          | 16-17, appendix             |
|                               | 13e    | Describe any methods used to explore possible causes of heterogeneity among study results (e.g. subgroup analysis, meta-regression).                                                                                                                                                                 | 16-17, appendix             |
|                               | 13f    | Describe any sensitivity analyses conducted to assess robustness of the synthesized results.                                                                                                                                                                                                         | 16-17, appendix             |
| Reporting bias assessment     | 14     | Describe any methods used to assess risk of bias due to missing results in a synthesis (arising from reporting biases).                                                                                                                                                                              | 16-17, appendix             |
| Certainty assessment          | 15     | Describe any methods used to assess certainty (or confidence) in the body of evidence for an outcome.                                                                                                                                                                                                | 16-17, appendix             |
| <b>RESULTS</b>                |        |                                                                                                                                                                                                                                                                                                      |                             |
| Study selection               | 16a    | Describe the results of the search and selection process, from the number of records identified in the search to the number of                                                                                                                                                                       | 18-19, Fig 1                |

| Section and Topic                              | Item # | Checklist item                                                                                                                                                                                                                                                                       | Page where item is reported |
|------------------------------------------------|--------|--------------------------------------------------------------------------------------------------------------------------------------------------------------------------------------------------------------------------------------------------------------------------------------|-----------------------------|
|                                                |        | studies included in the review, ideally using a flow diagram.                                                                                                                                                                                                                        |                             |
|                                                | 16b    | Cite studies that might appear to meet the inclusion criteria, but which were excluded, and explain why they were excluded.                                                                                                                                                          | 18-19, eTab 2               |
| Study characteristics                          | 17     | Cite each included study and present its characteristics.                                                                                                                                                                                                                            | 18-19, eTab 3               |
| Risk of bias in studies                        | 18     | Present assessments of risk of bias for each included study.                                                                                                                                                                                                                         | 18-19, eFig 3               |
| Results of individual studies                  | 19     | For all outcomes, present, for each study: (a) summary statistics for each group (where appropriate) and (b) an effect estimate and its precision (e.g. confidence/credible interval), ideally using structured tables or plots.                                                     | 18-19, eTab 3               |
| Results of syntheses                           | 20a    | For each synthesis, briefly summarise the characteristics and risk of bias among contributing studies.                                                                                                                                                                               | 18-19, eFig 4               |
|                                                | 20b    | Present results of all statistical syntheses conducted. If meta-analysis was done, present for each the summary estimate and its precision (e.g. confidence/credible interval) and measures of statistical heterogeneity. If comparing groups, describe the direction of the effect. | 19-20, Fig 3, eFig 3        |
|                                                | 20c    | Present results of all investigations of possible causes of heterogeneity among study results.                                                                                                                                                                                       | 19-20, eTab 6-7             |
|                                                | 20d    | Present results of all sensitivity analyses conducted to assess the robustness of the synthesized results.                                                                                                                                                                           | 19-20                       |
| Reporting biases                               | 21     | Present assessments of risk of bias due to missing results (arising from reporting biases) for each synthesis assessed.                                                                                                                                                              | 20-22, eFig 4               |
| Certainty of evidence                          | 22     | Present assessments of certainty (or confidence) in the body of evidence for each outcome assessed.                                                                                                                                                                                  | 20-22, eTab 6-7             |
| <b>DISCUSSION</b>                              |        |                                                                                                                                                                                                                                                                                      |                             |
| Discussion                                     | 23a    | Provide a general interpretation of the results in the context of other evidence.                                                                                                                                                                                                    | 23-25                       |
|                                                | 23b    | Discuss any limitations of the evidence included in the review.                                                                                                                                                                                                                      | 26-27                       |
|                                                | 23c    | Discuss any limitations of the review processes used.                                                                                                                                                                                                                                | 26-27                       |
|                                                | 23d    | Discuss implications of the results for practice, policy, and future research.                                                                                                                                                                                                       | 28                          |
| <b>OTHER INFORMATION</b>                       |        |                                                                                                                                                                                                                                                                                      |                             |
| Registration and protocol                      | 24a    | Provide registration information for the review, including register name and registration number, or state that the review was not registered.                                                                                                                                       | 10                          |
|                                                | 24b    | Indicate where the review protocol can be accessed, or state that a protocol was not prepared.                                                                                                                                                                                       | 10                          |
|                                                | 24c    | Describe and explain any amendments to information provided at registration or in the protocol.                                                                                                                                                                                      | 10                          |
| Support                                        | 25     | Describe sources of financial or non-financial support for the review, and the role of the funders or sponsors in the review.                                                                                                                                                        | 29                          |
| Competing interests                            | 26     | Declare any competing interests of review authors.                                                                                                                                                                                                                                   | 29                          |
| Availability of data, code and other materials | 27     | Report which of the following are publicly available and where they can be found: template data collection forms; data extracted from included studies; data used for all analyses; analytic code; any other materials used in the review.                                           | 29                          |

The current checklist followed the latest PRISMA 2020 guideline.<sup>1</sup>

**eTable 2: Keywords in each database and search result**

| Database         | Keyword                                                                                                                                                                                                                                                                                                                                                                                                                                                                                                                                     | Filter | Date       | Result |
|------------------|---------------------------------------------------------------------------------------------------------------------------------------------------------------------------------------------------------------------------------------------------------------------------------------------------------------------------------------------------------------------------------------------------------------------------------------------------------------------------------------------------------------------------------------------|--------|------------|--------|
| PubMed           | (deep transcranial magnetic stimulation OR dTMS OR repetitive transcranial magnetic stimulation OR rTMS OR TMS OR non-invasive brain stimulation OR theta burst stimulation OR transcranial direct current stimulation OR TBS OR tDCS OR vagus nerve stimulation OR vagal nerve stimulation OR tvNS OR nVNS OR VNS OR static magnetic field stimulation OR tSMS) AND (negative symptoms OR anhedonia OR alogia OR asociality OR avolition OR apathy) AND (schizophrenia OR schizophrenic disorder) AND (random OR randomized OR randomised) | NA     | 2021/12/07 | 115    |
| Embase           | (deep transcranial magnetic stimulation OR dTMS OR repetitive transcranial magnetic stimulation OR rTMS OR TMS OR non-invasive brain stimulation OR theta burst stimulation OR transcranial direct current stimulation OR TBS OR tDCS OR vagus nerve stimulation OR vagal nerve stimulation OR tvNS OR nVNS OR VNS OR static magnetic field stimulation OR tSMS) AND (negative symptoms OR anhedonia OR alogia OR asociality OR avolition OR apathy) AND (schizophrenia OR schizophrenic disorder) AND (random OR randomized OR randomised) | NA     | 2021/12/07 | 213    |
| ClinicalKey      | (non-invasive brain stimulation) AND (schizophrenia) AND (negative symptom)                                                                                                                                                                                                                                                                                                                                                                                                                                                                 | NA     | 2021/12/07 | 579    |
| Cochrane CENTRAL | (deep transcranial magnetic stimulation OR dTMS OR repetitive transcranial magnetic stimulation OR rTMS OR TMS OR non-invasive brain stimulation OR theta burst stimulation OR transcranial direct current stimulation OR TBS OR tDCS OR vagus nerve stimulation OR vagal nerve stimulation OR tvNS OR nVNS OR VNS OR static magnetic field stimulation OR tSMS) AND (negative symptoms OR anhedonia OR alogia OR asociality OR avolition OR apathy) AND                                                                                    | NA     | 2021/12/07 | 181    |



|                    |                                                                                                                                                                                                                                                                                                                                                                                                                                                                                                                                             |                  |            |      |
|--------------------|---------------------------------------------------------------------------------------------------------------------------------------------------------------------------------------------------------------------------------------------------------------------------------------------------------------------------------------------------------------------------------------------------------------------------------------------------------------------------------------------------------------------------------------------|------------------|------------|------|
|                    | (schizophrenia OR schizophrenic disorder) AND (random OR randomized OR randomised)                                                                                                                                                                                                                                                                                                                                                                                                                                                          |                  |            |      |
| ProQuest           | (non-invasive brain stimulation) AND (schizophrenia) AND (negative symptom)                                                                                                                                                                                                                                                                                                                                                                                                                                                                 | NA               | 2021/12/07 | 2822 |
| ScienceDirect      | (non-invasive brain stimulation) AND (schizophrenia) AND (negative symptom)                                                                                                                                                                                                                                                                                                                                                                                                                                                                 | Research article | 2021/12/07 | 829  |
| Web of Science     | (deep transcranial magnetic stimulation OR dTMS OR repetitive transcranial magnetic stimulation OR rTMS OR TMS OR non-invasive brain stimulation OR theta burst stimulation OR transcranial direct current stimulation OR TBS OR tDCS OR vagus nerve stimulation OR vagal nerve stimulation OR tvNS OR nVNS OR VNS OR static magnetic field stimulation OR tSMS) AND (negative symptoms OR anhedonia OR alogia OR asociality OR avolition OR apathy) AND (schizophrenia OR schizophrenic disorder) AND (random OR randomized OR randomised) | NA               | 2021/12/07 | 128  |
| ClinicalTrials.gov | (non-invasive brain stimulation) AND (schizophrenia) AND (negative symptom)                                                                                                                                                                                                                                                                                                                                                                                                                                                                 | NA               | 2021/12/07 | 0    |

Abbreviation: NA: not applied

**eTable 3: Excluded studies and reason**

| Reason                                                                                         | Numbers | Reference      |
|------------------------------------------------------------------------------------------------|---------|----------------|
| Did not provide detailed demographic information of each group                                 | 1       | 45             |
| Duplicate sample sources as other included studies                                             | 3       | 46-48          |
| Intended to select specific patients from previous RCTs, which would violate the randomization | 1       | 49             |
| Lack of sufficient data                                                                        | 2       | 50,51          |
| Meta-analysis                                                                                  | 12      | 2-11,16,21     |
| Not investigate target outcome (i.e. negative symptoms)                                        | 16      | 52-67          |
| Not randomization controlled trial                                                             | 7       | 68-74          |
| Not simply schizophrenia/schizoaffective disorder (also consist of depression)                 | 1       | 75             |
| Only provide result of subgroup, which would violate the randomization                         | 1       | 76             |
| Review article                                                                                 | 8       | 13-15,17-20,77 |
| Study protocol but not result of a study                                                       | 1       | 78             |

**eTable 4: Characteristics of the included studies**

| Study name                          | Machine origin | Diagnosis criteria | Comparison                                                                              | Subject | mean age  | female (%) | Tx duration (week) | Whole duration (week)* | Country |
|-------------------------------------|----------------|--------------------|-----------------------------------------------------------------------------------------|---------|-----------|------------|--------------------|------------------------|---------|
| Basavaraju, R. (2021) <sup>79</sup> | MagVenture     | DSM-5              | iTBS at Iz (vermal part of cerebellum)<br>Sham control                                  | 30      | 31.2±9.9  | 20.0       | 1                  | 7                      | India   |
|                                     |                |                    |                                                                                         | 30      | 34.2±8.1  | 26.7       |                    |                        |         |
| Bation, R. (2021) <sup>80</sup>     | MagVenture     | DSM-IV-TR          | iTBS at left DLPFC (F3)<br>Sham control                                                 | 12      | 42.3±9.4  | 0.0        | 2                  | 26                     | France  |
|                                     |                |                    |                                                                                         | 10      | 41.6±12.6 | 10.0       |                    |                        |         |
| Chang, C.C. (2021) <sup>81</sup>    | NeuroConn      | DSM-5              | High definition 2 mA Anode tRNS at AF3, cathode at AF4, F2, F6, and FC4<br>Sham control | 17      | 44.1±12.5 | 35.3       | 1                  | 5                      | Taiwan  |
|                                     |                |                    |                                                                                         | 18      | 43.2±11.6 | 44.4       |                    |                        |         |
| Chauhan, P. (2021) <sup>82</sup>    | MagVenture     | ICD-10             | iTBS at Iz (vermal part of cerebellum)<br>Sham control                                  | 19      | 41.7±8.9  | 63.2       | 1                  | 3                      | India   |
|                                     |                |                    |                                                                                         | 17      | 39.4±8.2  | 52.9       |                    |                        |         |
| Dharani, R. (2021) <sup>83</sup>    | Starstim       | ICD-10             | High definition 2 mA Anode tDCS at F3, cathode at AF3, F7, FC5, and FC1<br>Sham control | 7       | 39.1±3.8  | 14.3       | 2                  | 2                      | India   |
|                                     |                |                    |                                                                                         | 7       | 33.9±6.8  |            |                    |                        |         |
| Pan, Z. (2021) <sup>84</sup>        | Magstim        | DSM-IV             | 10 Hz rTMS at left DLPFC (F3)<br>Sham control                                           | 19      | 56.7±12.4 | 26.3       | 4                  | 4                      | China   |
|                                     |                |                    |                                                                                         | 19      | 57.4±8.7  | 36.8       |                    |                        |         |
| Zhu, L. (2021) <sup>85</sup>        | Medtronic      | ICD-10             | iTBS at Iz (vermal part of cerebellum)<br>Sham control                                  | 32      | 35.2±7.1  | 43.75      | 2                  | 26                     | China   |
|                                     |                |                    |                                                                                         | 32      | 35.3±6.1  | 56.25      |                    |                        |         |
| Chang, C.C. (2020) <sup>86</sup>    | NeuroConn      | DSM-IV-TR          | 2 mA Anode tDCS at F3Fp1, cathode at F4Fp2<br>Sham control                              | 30      | 44.7±10.7 | 36.7       | 1                  | 13                     | Taiwan  |
|                                     |                |                    |                                                                                         | 30      | 45.0±10.9 | 63.3       |                    |                        |         |
| Guan, H.Y. (2020) <sup>87</sup>     | Magstim        | DSM-IV             | 20 Hz rTMS at left DLPFC (F3)<br>Sham control                                           | 21      | 55.5±7.3  | NA         | 8                  | 8                      | China   |
|                                     |                |                    |                                                                                         | 20      | 49.3±10.2 |            |                    |                        |         |

|                                         |                      |               |                                                      |    |           |      |   |    |             |
|-----------------------------------------|----------------------|---------------|------------------------------------------------------|----|-----------|------|---|----|-------------|
| Kumar, N. (2020) <sup>88</sup>          | Magstim              | ICD-10        | 20 Hz rTMS at left DLPFC (F3)                        | 50 | 32.4±9.2  | 42.0 | 4 | 20 | India       |
|                                         |                      |               | Sham control                                         | 50 | 30.8±9.3  | 44.0 |   |    |             |
| Li, X. (2020) <sup>89</sup>             | YRD CCY-I stimulator | DSM-IV        | 10 Hz rTMS at left DLPFC (F3)                        | 47 | 23.9±5.7  | 51.1 | 2 | 14 | China       |
|                                         |                      |               | Controls (risperidone only)                          | 47 | 24.0±5.3  | 48.9 |   |    |             |
| Singh, S. (2020) <sup>90</sup>          | Magstim              | ICD-10        | 20 Hz rTMS at left DLPFC (F3)                        | 15 | 33.3±9.8  | 46.7 | 4 | 4  | India       |
|                                         |                      |               | Sham control                                         | 15 | 29.8±5.7  | 40.0 |   |    |             |
| Valiengo, L.D.C.L. (2020) <sup>91</sup> | NeuroConn            | DSM-IV        | 2 mA Anode tDCS at F3, cathode at T3P3 (left TPJ)    | 50 | 34.6±8.4  | 18.0 | 1 | 13 | Brazil      |
|                                         |                      |               | Sham control                                         | 50 | 35.9±10.1 | 22.0 |   |    |             |
| Xiu, M.H. (2020) <sup>92</sup>          | Magstim              | DSM-IV        | 20 Hz rTMS at left DLPFC (F3)                        | 40 | 52.0±10.0 | 0.0  | 8 | 32 | China       |
|                                         |                      |               | 10 Hz rTMS at left DLPFC (F3)                        | 40 | 1         | 0.0  |   |    |             |
|                                         |                      |               | Sham control                                         | 40 | 50.7±9.0  | 0.0  |   |    |             |
| Chang, C.C. (2019) <sup>93</sup>        | NeuroConn            | DSM-IV-TR     | 2 mA Anode tDCS at F3Fp1, cathode at T3P3 (left TPJ) | 30 | 46.4±10.0 | 53.3 | 1 | 1  | Taiwan      |
|                                         |                      |               | Sham control                                         | 30 | 3         | 56.7 |   |    |             |
|                                         |                      |               |                                                      |    | 42.2±10.3 |      |   |    |             |
| Zhuo, K. (2019) <sup>94</sup>           | MagVenture           | DSM-IV-TR     | 20 Hz rTMS at left DLPFC (F3)                        | 33 | 29.0±7.4  | 33.3 | 4 | 4  | China       |
|                                         |                      |               | Sham control                                         | 27 | 30.6±8.3  | 29.6 |   |    |             |
| Gomes, J.S. (2018) <sup>95</sup>        | not mentioned        | DSM-IV        | 2 mA Anode tDCS at F3, cathode at F4                 | 12 | 39.2±9.3  | 16.7 | 2 | 14 | Brazil      |
|                                         |                      |               | Sham control                                         | 12 | 33.8±12.1 | 41.7 |   |    |             |
| Jeon, D.W. (2018) <sup>96</sup>         | YDT-201N             | DSM-5         | 2 mA Anode tDCS at F3, cathode at F4                 | 26 | 40.0±9.4  | 50.0 | 2 | 14 | South Korea |
|                                         |                      |               | Sham control                                         | 28 | 39.9±12.4 | 53.6 |   |    |             |
| Mellin, J.M. (2018) <sup>97</sup>       | NeuroConn            | DSM-IV        | 2 mA 10Hz tACS at F3Fp1 to T3P3 (TPJ)                | 8  | 47.0±9.7  | 12.5 | 1 | 5  | USA         |
|                                         |                      |               | 2 mA Cathode tDCS at F3Fp1, anode at T3P3 (left TPJ) | 7  | 29.6±11.0 | 42.9 |   |    |             |
|                                         |                      |               | Sham control                                         | 7  | 0         | 42.9 |   |    |             |
|                                         |                      |               |                                                      |    | 38.9±10.0 |      |   |    |             |
| Hasan, A. (2017) <sup>98</sup>          | Medtronic            | ICD-10/DSM-IV | 10 Hz rTMS at left DLPFC (F3)                        | 34 | 33.9±8.9  | 14.7 | 3 | 3  | Germany     |
|                                         |                      |               | Sham control                                         | 39 | 36.0±9.9  | 20.5 |   |    |             |

|                                             |               |           |                                                                                                                                                      |          |                        |              |    |                    |                 |
|---------------------------------------------|---------------|-----------|------------------------------------------------------------------------------------------------------------------------------------------------------|----------|------------------------|--------------|----|--------------------|-----------------|
| Frohlich, F. (2016) <sup>99</sup>           | NeuroConn     | DSM-IV    | 2 mA Anode tDCS at F3Fp1, cathode at T3P3 (left TPJ)<br>Sham control                                                                                 | 13<br>13 | 43.4±12.6<br>40.0±10.7 | 23.1<br>7.7  | 1  | 5                  | USA             |
| Garg, S. (2016) <sup>100</sup>              | Magstim       | ICD-10    | Theta-range rTMS at Iz (vermal part of cerebellum)<br>Sham control                                                                                   | 20<br>20 | 32.4±8.4<br>30.8±7.9   | 15.0<br>20.0 | 2  | 4                  | India           |
| Li, Z. (2016) <sup>33</sup>                 | Medtronic     | ICD-9-CM  | 10 Hz rTMS at left DLPFC (F3)<br>Sham control                                                                                                        | 25<br>22 | 45.2<br>44.9           | 52.0<br>50.0 | 4  | 8                  | China           |
| Mondino, M. (2016) <sup>101</sup>           | NeuroConn     | DSM-IV-TR | 2 mA Anode tDCS at F3, cathode at T3P3 (left TPJ)<br>Sham control                                                                                    | 11<br>12 | 36.7±9.7<br>37.3±9.7   | 27.3<br>41.7 | 2  | 2                  | France          |
| Palm, U. (2016) <sup>102</sup>              | NeuroConn     | DSM-IV    | 2 mA Anode tDCS at F3, cathode at Fp2<br>Sham control                                                                                                | 10<br>10 | 38.4±12.9<br>34.1±10.7 | 50.0<br>0.0  | 2  | 4                  | Germany         |
| Dlabac-de Lange, J.J. (2015) <sup>103</sup> | Medtronic     | DSM-IV    | 10 Hz rTMS at left DLPFC (F3) and right DLPFC (F4)<br>Sham control                                                                                   | 16<br>16 | 41.8±11.6<br>32.3±9.7  | 12.5<br>25.0 | 3  | 15                 | the Netherlands |
| Gan, J. (2015) <sup>104</sup>               | Magstim       | DSM-IV    | 10 Hz rTMS at left DLPFC (F3)<br>Sham control                                                                                                        | 32<br>35 | 28.0±9.0<br>29.0±9.0   | 37.5<br>31.4 | 2  | 2 <sup>&amp;</sup> | China           |
| Hasan, A. (2015) <sup>105</sup>             | Cerbomed      | ICD-10    | tVNS at left auricle<br>Sham control                                                                                                                 | 9<br>8   | 37.6±10.5<br>35.5±12.7 | 44.4<br>62.5 | 12 | 12 <sup>#</sup>    | Germany         |
| Quan, W.X. (2015) <sup>106</sup>            | Cadwell MES-9 | DSM-IV    | 10 Hz rTMS at left DLPFC (F3)<br>Sham control                                                                                                        | 78<br>39 | 46.9±7.9<br>46.9±9.1   | 43.6<br>28.2 | 2  | 8                  | China           |
| Ray, P. (2015) <sup>107</sup>               | Magstim       | ICD-10    | 6 Hz priming rTMS at PT3 (left temporo-parietal cortex) + 1 Hz rTMS at PT3<br>Sham priming control + 1 Hz rTMS at PT3 (left temporo-parietal cortex) | 20<br>20 | 31.4±7.1<br>29.3±8.7   | NA           | 2  | 6                  | India           |

|                                     |           |           |                                                                                                           |                      |                                                  |                              |   |    |                |
|-------------------------------------|-----------|-----------|-----------------------------------------------------------------------------------------------------------|----------------------|--------------------------------------------------|------------------------------|---|----|----------------|
| Wobrock, T. (2015) <sup>108</sup>   | Medtronic | ICD-10    | 10 Hz rTMS at left DLPFC (F3)<br>Sham control                                                             | 76<br>81             | 36.2±10.5<br>34.9±9.1                            | 18.4<br>30.9                 | 3 | 3  | Germany        |
| Rabany, L. (2014) <sup>109</sup>    | Magstim   | ICD-10    | 20 Hz deep rTMS at left DLPFC (F3)<br>Sham control                                                        | 20<br>10             | 33.1±11.3<br>35.9±11.0                           | 35.0<br>10.0                 | 4 | 8  | Israel         |
| Zhao, S. (2014) <sup>110</sup>      | Magpro    | DSM-IV    | 10 Hz rTMS at left DLPFC (F3)<br>20 Hz rTMS at left DLPFC (F3)<br>iTBS at left DLPFC (F3)<br>Sham control | 24<br>23<br>24<br>22 | 48.0±12.2<br>49.1±10.6<br>47.7±11.8<br>46.7±13.1 | 55.2<br>56.5<br>45.9<br>45.5 | 4 | 4  | China          |
| Prikryl, R. (2013) <sup>111</sup>   | Magstim   | ICD-10    | 10 Hz rTMS at left DLPFC (F3)<br>Sham control                                                             | 23<br>17             | 31.6±8.0<br>33.9±10.0                            | 0.0<br>0.0                   | 3 | 3  | Czech Republic |
| Barr, M.S. (2012) <sup>112</sup>    | Medtronic | DSM-IV    | 20 Hz rTMS at left DLPFC (F3) and right DLPFC (F4)<br>Sham control                                        | 13<br>12             | 40.5±12.2<br>47.9±12.8                           | 46.2<br>16.7                 | 4 | 6  | Canada         |
| Brunelin, J. (2012) <sup>113</sup>  | NeuroConn | DSM-IV-TR | 2 mA Anode tDCS at F3Fp1, cathode at T3P3 (left TPJ)<br>Sham control                                      | 15<br>15             | 40.4±9.9<br>35.1±7.0                             | NA                           | 1 | 13 | France         |
| Prikryl, R. (2012) <sup>114</sup>   | Magstim   | ICD-10    | 10 Hz rTMS at left DLPFC (F3)<br>Sham control                                                             | 19<br>11             | 30.5±9.2<br>34.6±10.6                            | 0.0<br>0.0                   | 3 | 3  | Czech Republic |
| Rosenberg, O. (2012) <sup>115</sup> | Magstim   | DSM-IV-TR | 1 Hz deep rTMS at PT3 (left temporo-parietal cortex)<br>Sham control                                      | 9<br>9               | 40.8±16.6<br>38.4±12.6                           | 22.2<br>11.1                 | 2 | 2  | Israel         |

|                                        |                |               |                                                                                                           |                      |                                              |                          |   |   |                |
|----------------------------------------|----------------|---------------|-----------------------------------------------------------------------------------------------------------|----------------------|----------------------------------------------|--------------------------|---|---|----------------|
| Zheng, L.N. (2012) <sup>116</sup>      | Magpro         | CCMD3         | iTBS at left DLPFC (F3)<br>10 Hz rTMS at left DLPFC (F3)<br>20 Hz rTMS at left DLPFC (F3)<br>Sham control | 18<br>19<br>19<br>17 | 56.4±9.3<br>56.5±7.4<br>56.8±5.4<br>55.6±5.8 | 0.0<br>0.0<br>0.0<br>0.0 | 1 | 1 | China          |
| Fitzgerald, P.B. (2008) <sup>117</sup> | Medtronic      | DSM-IV        | 10 Hz rTMS at left PFC (F3) and right PFC (F4)<br>Sham control                                            | 12<br>8              | 37.2±10.4<br>33.2±9.8                        | 16.7<br>25.0             | 3 | 3 | Australia      |
| Mogg, A. (2007) <sup>118</sup>         | Magstim        | DSM-IV        | 10 Hz rTMS at left DLPFC (F3)<br>Sham control                                                             | 8<br>9               | 50.8±14.5<br>33.6±9.8                        | 12.5<br>0.0              | 2 | 4 | UK             |
| Prikryl, R. (2007) <sup>119</sup>      | Magstim        | ICD-10        | 10 Hz rTMS at left DLPFC (F3)<br>Sham control                                                             | 11<br>11             | 31.4±8.4<br>36.5±10.7                        | 0.0<br>0.0               | 3 | 3 | Czech Republic |
| Rosa, M.O. (2007) <sup>120</sup>       | Medtronic      | DSM-IV        | 1 Hz rTMS at PT3 (left temporo-parietal cortex)<br>Sham control                                           | 6<br>5               | 29.8±8.4<br>33.0±12.1                        | 33.3<br>60.0             | 2 | 6 | Brazil         |
| Novak, T. (2006) <sup>121</sup>        | Magstim        | DSM-IV        | 20 Hz rTMS at left DLPFC (F3)<br>Sham control                                                             | 8<br>8               | 35.3±9.2<br>32.8±6.3                         | 12.5<br>37.5             | 2 | 8 | Czech Republic |
| Saba, G. (2006) <sup>122</sup>         | Magstim        | DSM-IV        | 1 Hz rTMS at PT3 (left temporo-parietal cortex)<br>Sham control                                           | 8<br>8               | 30.7±8.0<br>30.6±8.0                         | 18.8                     | 2 | 2 | France         |
| Hajak, G. (2004) <sup>123</sup>        | Magstim        | DSM-IV        | 10 Hz rTMS at left DLPFC (F3)<br>Sham control                                                             | 10<br>10             | 37.9±7.7<br>41.7±10.3                        | 80.0<br>60.0             | 2 | 2 | Germany        |
| Holi, M.M. (2004) <sup>124</sup>       | Magstim        | DSM-IV        | 10 Hz rTMS at left DLPFC (F3)<br>Sham control                                                             | 11<br>11             | 38.5±10.2<br>34.8±9.8                        | 13.6                     | 2 | 2 | Finland        |
| Klein, E. (1999) <sup>125</sup>        | Cadwell MES-10 | not mentioned | 1 Hz rTMS at right PFC (F4)<br>Sham control                                                               | 18<br>17             | 30.2±10.0<br>29.5±9.3                        | 61.1<br>64.7             | 2 | 6 | Israel         |

\*: whole duration = treatment duration + post-treatment follow-up duration

&: we extracted outcome at week 2 because of insufficient data of control group at week 12

#: extract primary endpoint data (i.e. the end of treatment period I)



**eTable 5A:** SUCRA of the improvement of negative symptoms

| Treatment                         | (Full name)                                                                | SUCRA |
|-----------------------------------|----------------------------------------------------------------------------|-------|
| hd-tRNS-AF3AF4F2F6FC4             | High definition 2 mA Anode tRNS at AF3, cathode at AF4, F2, F6, and FC4    | 2.4   |
| iTBS-F3                           | iTBS at left DLPFC (F3)                                                    | 12.4  |
| a-tDCS-F3Fp1 + c-tDCS-F4Fp2       | 2 mA Anode tDCS at F3Fp1, cathode at F4Fp2                                 | 15.7  |
| a-tDCS-F3 + c-tDCS-Fp2            | 2 mA Anode tDCS at F3, cathode at Fp2                                      | 17.3  |
| a-tDCS-F3 + c-tDCS-TP3            | 2 mA Anode tDCS at F3, cathode at TP3 (left TPJ)                           | 27.4  |
| hf-rTMS-F3F4                      | hf (10Hz) rTMS at left PFC (F3) and right PFC (F4)                         | 40.1  |
| ehf-rTMS-F3                       | extreme hf (20Hz) rTMS at left DLPFC (F3)                                  | 44.5  |
| hf-rTMS-F3                        | hf (10Hz) rTMS at left DLPFC (F3)                                          | 45.3  |
| hd-a-tDCS-F3 + c-tDCS-AF3F7FC5FC1 | High definition 2 mA Anode tDCS at F3, cathode at AF3, F7, FC5, and FC1    | 45.3  |
| prTMS-PT3 + lf-rTMS-PT3           | 6 Hz priming rTMS at PT3 (left temporo-parietal cortex) + 1 Hz rTMS at PT3 | 48.8  |
| a-tDCS-F3Fp1 + c-tDCS-TP3         | 2 mA Anode tDCS at F3Fp1, cathode at T3P3 (left TPJ)                       | 49.2  |
| ehf-dTMS-F3                       | 20 Hz deep rTMS at left DLPFC (F3)                                         | 49.8  |
| ehf-rTMS-F3F4                     | extreme hf (20Hz) rTMS at left DLPFC (F3) and right DLPFC (F4)             | 51.2  |
| tVNS                              | tVNS at left auricle                                                       | 57.1  |
| lf-dTMS-PT3                       | 1 Hz deep rTMS at PT3 (left temporo-parietal cortex)                       | 58.8  |
| lf-rTMS-PT3                       | 1 Hz rTMS at PT3 (left temporo-parietal cortex)                            | 60.7  |
| a-tDCS-F3 + c-tDCS-F4             | 2 mA Anode tDCS at F3, cathode at F4                                       | 64.8  |
| tACS-F3Fp1-TP3                    | 2 mA 10Hz tACS at F3Fp1 to T3P3 (TPJ)                                      | 72.2  |
| Sham                              | Sham                                                                       | 72.4  |

|                           |                                                      |      |
|---------------------------|------------------------------------------------------|------|
| iTBS-lz                   | iTBS at lz (vermal part of cerebellum)               | 73.0 |
| a-tDCS-TP3 + c-tDCS-F3Fp1 | 2 mA Cathode tDCS at F3Fp1, anode at T3P3 (left TPJ) | 79.5 |
| lf-rTMS-F4                | 1 Hz rTMS at right PFC (F4)                          | 79.8 |
| the-rTMS-lz               | Theta-range rTMS at lz (vermal part of cerebellum)   | 82.2 |

Sorted by efficacy order (the former, the better improvement of negative symptoms)

**eTable 5B:** SUCRA of the improvement of negative symptoms: subgroup of definite diagnostic criteria

| Treatment                         | (Full name)                                                                | SUCRA |
|-----------------------------------|----------------------------------------------------------------------------|-------|
| hd-tRNS-AF3AF4F2F6FC4             | High definition 2 mA Anode tRNS at AF3, cathode at AF4, F2, F6, and FC4    | 3.0   |
| iTBS-F3                           | iTBS at left DLPFC (F3)                                                    | 12.4  |
| a-tDCS-F3Fp1 + c-tDCS-F4Fp2       | 2 mA Anode tDCS at F3Fp1, cathode at F4Fp2                                 | 16.2  |
| a-tDCS-F3 + c-tDCS-Fp2            | 2 mA Anode tDCS at F3, cathode at Fp2                                      | 18.2  |
| a-tDCS-F3 + c-tDCS-TP3            | 2 mA Anode tDCS at F3, cathode at TP3 (left TPJ)                           | 28.0  |
| hf-rTMS-F3F4                      | hf (10Hz) rTMS at left PFC (F3) and right PFC (F4)                         | 41.0  |
| ehf-rTMS-F3                       | extreme hf (20Hz) rTMS at left DLPFC (F3)                                  | 45.6  |
| hf-rTMS-F3                        | hf (10Hz) rTMS at left DLPFC (F3)                                          | 47.6  |
| hd-a-tDCS-F3 + c-tDCS-AF3F7FC5FC1 | High definition 2 mA Anode tDCS at F3, cathode at AF3, F7, FC5, and FC1    | 48.7  |
| prTMS-PT3 + lf-rTMS-PT3           | 6 Hz priming rTMS at PT3 (left temporo-parietal cortex) + 1 Hz rTMS at PT3 | 48.8  |
| a-tDCS-F3Fp1 + c-tDCS-TP3         | 2 mA Anode tDCS at F3Fp1, cathode at T3P3 (left TPJ)                       | 50.2  |
| ehf-dTMS-F3                       | 20 Hz deep rTMS at left DLPFC (F3)                                         | 51.1  |
| ehf-rTMS-F3F4                     | extreme hf (20Hz) rTMS at left DLPFC (F3) and right DLPFC (F4)             | 52.3  |
| tVNS                              | tVNS at left auricle                                                       | 59.6  |
| lf-rTMS-PT3                       | 1 Hz rTMS at PT3 (left temporo-parietal cortex)                            | 61.1  |
| lf-dTMS-PT3                       | 1 Hz deep rTMS at PT3 (left temporo-parietal cortex)                       | 61.7  |
| a-tDCS-F3 + c-tDCS-F4             | 2 mA Anode tDCS at F3, cathode at F4                                       | 67.1  |
| tACS-F3Fp1-TP3                    | 2 mA 10Hz tACS at F3Fp1 to T3P3 (TPJ)                                      | 73.9  |
| Sham                              | Sham                                                                       | 74.5  |

|                           |                                                      |      |
|---------------------------|------------------------------------------------------|------|
| iTBS-lz                   | iTBS at lz (vermal part of cerebellum)               | 76.2 |
| a-tDCS-TP3 + c-tDCS-F3Fp1 | 2 mA Cathode tDCS at F3Fp1, anode at T3P3 (left TPJ) | 79.4 |
| the-rTMS-lz               | Theta-range rTMS at lz (vermal part of cerebellum)   | 83.5 |

Sorted by efficacy order (the former, the better improvement of negative symptoms)

**eTable 5C:** SUCRA of the tolerability in aspect of drop-out rate

| Treatment                         | (Full name)                                                                | SUCRA |
|-----------------------------------|----------------------------------------------------------------------------|-------|
| hf-rTMS-F3F4                      | hf (10Hz) rTMS at left PFC (F3) and right PFC (F4)                         | 79.6  |
| iTBS-F3                           | iTBS at left DLPFC (F3)                                                    | 74.3  |
| hf-rTMS-F3                        | hf (10Hz) rTMS at left DLPFC (F3)                                          | 69.8  |
| ehf-rTMS-F3                       | extreme hf (20Hz) rTMS at left DLPFC (F3)                                  | 56.4  |
| lf-rTMS-F4                        | 1 Hz rTMS at right PFC (F4)                                                | 54.6  |
| tACS-F3Fp1-TP3                    | 2 mA 10Hz tACS at F3Fp1 to T3P3 (TPJ)                                      | 53.7  |
| hd-a-tDCS-F3 + c-tDCS-AF3F7FC5FC1 | High definition 2 mA Anode tDCS at F3, cathode at AF3, F7, FC5, and FC1    | 53.4  |
| lf-dTMS-PT3                       | 1 Hz deep rTMS at PT3 (left temporo-parietal cortex)                       | 53.3  |
| a-tDCS-F3 + c-tDCS-Fp2            | 2 mA Anode tDCS at F3, cathode at Fp2                                      | 53.1  |
| lf-rTMS-PT3                       | 1 Hz rTMS at PT3 (left temporo-parietal cortex)                            | 52.6  |
| a-tDCS-TP3 + c-tDCS-F3Fp1         | 2 mA Cathode tDCS at F3Fp1, anode at T3P3 (left TPJ)                       | 52.5  |
| Sham                              | Sham                                                                       | 52.0  |
| tVNS                              | tVNS at left auricle                                                       | 51.4  |
| the-rTMS-lz                       | Theta-range rTMS at lz (vermal part of cerebellum)                         | 44.4  |
| prTMS-PT3 + lf-rTMS-PT3           | 6 Hz priming rTMS at PT3 (left temporo-parietal cortex) + 1 Hz rTMS at PT3 | 44.1  |
| iTBS-lz                           | iTBS at lz (vermal part of cerebellum)                                     | 43.5  |
| a-tDCS-F3 + c-tDCS-F4             | 2 mA Anode tDCS at F3, cathode at F4                                       | 35.2  |
| a-tDCS-F3Fp1 + c-tDCS-TP3         | 2 mA Anode tDCS at F3Fp1, cathode at T3P3 (left TPJ)                       | 31.3  |
| hd-tRNS-AF3AF4F2F6FC4             | High definition 2 mA Anode tRNS at AF3, cathode at AF4, F2, F6, and FC4    | 29.2  |

|                        |                                                  |      |
|------------------------|--------------------------------------------------|------|
| a-tDCS-F3 + c-tDCS-TP3 | 2 mA Anode tDCS at F3, cathode at TP3 (left TPJ) | 15.5 |
|------------------------|--------------------------------------------------|------|

Sorted by efficacy order (the former, the better tolerability in aspect of drop-out rate)

**eTable 5D:** SUCRA of the improvement of positive symptoms

| Treatment                         | (Full name)                                                                | SUCRA |
|-----------------------------------|----------------------------------------------------------------------------|-------|
| prTMS-PT3 + lf-rTMS-PT3           | 6 Hz priming rTMS at PT3 (left temporo-parietal cortex) + 1 Hz rTMS at PT3 | 22.8  |
| hd-a-tDCS-F3 + c-tDCS-AF3F7FC5FC1 | High definition 2 mA Anode tDCS at F3, cathode at AF3, F7, FC5, and FC1    | 27.2  |
| a-tDCS-F3 + c-tDCS-Fp2            | 2 mA Anode tDCS at F3, cathode at Fp2                                      | 28.7  |
| lf-dTMS-PT3                       | 1 Hz deep rTMS at PT3 (left temporo-parietal cortex)                       | 35.9  |
| lf-rTMS-PT3                       | 1 Hz rTMS at PT3 (left temporo-parietal cortex)                            | 37.4  |
| a-tDCS-F3Fp1 + c-tDCS-F4Fp2       | 2 mA Anode tDCS at F3Fp1, cathode at F4Fp2                                 | 37.7  |
| tACS-F3Fp1-TP3                    | 2 mA 10Hz tACS at F3Fp1 to T3P3 (TPJ)                                      | 39.1  |
| a-tDCS-TP3 + c-tDCS-F3Fp1         | 2 mA Cathode tDCS at F3Fp1, anode at T3P3 (left TPJ)                       | 40.4  |
| iTBS-lz                           | iTBS at lz (vermal part of cerebellum)                                     | 41.0  |
| a-tDCS-F3Fp1 + c-tDCS-TP3         | 2 mA Anode tDCS at F3Fp1, cathode at T3P3 (left TPJ)                       | 41.1  |
| a-tDCS-F3 + c-tDCS-TP3            | 2 mA Anode tDCS at F3, cathode at TP3 (left TPJ)                           | 44.2  |
| hf-rTMS-F3                        | hf (10Hz) rTMS at left DLPFC (F3)                                          | 47.4  |
| ehf-rTMS-F3F4                     | extreme hf (20Hz) rTMS at left DLPFC (F3) and right DLPFC (F4)             | 50.1  |
| Sham                              | Sham                                                                       | 51.7  |
| a-tDCS-F3 + c-tDCS-F4             | 2 mA Anode tDCS at F3, cathode at F4                                       | 55.8  |
| hd-tRNS-AF3AF4F2F6FC4             | High definition 2 mA Anode tRNS at AF3, cathode at AF4, F2, F6, and FC4    | 57.1  |
| hf-rTMS-F3F4                      | hf (10Hz) rTMS at left PFC (F3) and right PFC (F4)                         | 61.6  |
| lf-rTMS-F4                        | 1 Hz rTMS at right PFC (F4)                                                | 64.1  |
| the-rTMS-lz                       | Theta-range rTMS at lz (vermal part of cerebellum)                         | 71.6  |

|             |                                           |      |
|-------------|-------------------------------------------|------|
| ehf-rTMS-F3 | extreme hf (20Hz) rTMS at left DLPFC (F3) | 73.3 |
| tVNS        | tVNS at left auricle                      | 78.7 |
| iTBS-F3     | iTBS at left DLPFC (F3)                   | 93.1 |

Sorted by efficacy order (the former, the better improvement of positive symptoms)



**eTable 5E:** SUCRA of the improvement of depressive symptoms

| Treatment                   | (Full name)                                                    | SUCRA |
|-----------------------------|----------------------------------------------------------------|-------|
| a-tDCS-F3 + c-tDCS-Fp2      | 2 mA Anode tDCS at F3, cathode at Fp2                          | 10.1  |
| a-tDCS-F3Fp1 + c-tDCS-F4Fp2 | 2 mA Anode tDCS at F3Fp1, cathode at F4Fp2                     | 10.1  |
| a-tDCS-F3Fp1 + c-tDCS-TP3   | 2 mA Anode tDCS at F3Fp1, cathode at T3P3 (left TPJ)           | 20.7  |
| hf-rTMS-F3                  | hf (10Hz) rTMS at left DLPFC (F3)                              | 36.3  |
| a-tDCS-F3 + c-tDCS-F4       | 2 mA Anode tDCS at F3, cathode at F4                           | 42.8  |
| a-tDCS-F3 + c-tDCS-TP3      | 2 mA Anode tDCS at F3, cathode at TP3 (left TPJ)               | 43.8  |
| ehf-rTMS-F3                 | extreme hf (20Hz) rTMS at left DLPFC (F3)                      | 44.6  |
| the-rTMS-lz                 | Theta-range rTMS at lz (vermal part of cerebellum)             | 46.2  |
| ehf-dTMS-F3                 | 20 Hz deep rTMS at left DLPFC (F3)                             | 53.1  |
| tVNS                        | tVNS at left auricle                                           | 57.9  |
| Sham                        | Sham                                                           | 58.6  |
| ehf-rTMS-F3F4               | extreme hf (20Hz) rTMS at left DLPFC (F3) and right DLPFC (F4) | 75.3  |
| iTBS-lz                     | iTBS at lz (vermal part of cerebellum)                         | 78.3  |
| lf-rTMS-F4                  | 1 Hz rTMS at right PFC (F4)                                    | 80.0  |
| hf-rTMS-F3F4                | hf (10Hz) rTMS at left PFC (F3) and right PFC (F4)             | 92.2  |

Sorted by efficacy order (the former, the better improvement of depressive symptoms)

Abbreviation: DLPFC: dorsolateral prefrontal cortex; iTBS: intermittent theta-burst stimulation; NIBS: noninvasive brain stimulation; NMA: network meta-analysis; OR: odds ratio; rTMS: repetitive transcranial magnetic stimulation; SMD: standardized mean difference; SUCRA: surface under the cumulative ranking curve; TBS: theta-burst stimulation; tDCS: transcranial direct current stimulation; tRNS: transcranial random noise stimulation; tVNS: transcutaneous vagal nerve stimulation



|                      |                      |                      |                      |                      |                    |                      |                      |                    |                    |                    |                    |                    |                    |                    |                                                      |                                      |                                       |                    |                                        |                                                      |                                                    |                    |  |
|----------------------|----------------------|----------------------|----------------------|----------------------|--------------------|----------------------|----------------------|--------------------|--------------------|--------------------|--------------------|--------------------|--------------------|--------------------|------------------------------------------------------|--------------------------------------|---------------------------------------|--------------------|----------------------------------------|------------------------------------------------------|----------------------------------------------------|--------------------|--|
| *-2.01 (-3.70,-0.31) | -1.13 (-2.48,0.22)   | -1.11 (-2.67,0.46)   | -1.10 (-2.86,0.66)   | -0.66 (-2.08,0.76)   | -0.40 (-1.87,1.08) | -0.27 (-1.54,1.00)   | -0.24 (-1.50,1.01)   | -0.31 (-2.12,1.50) | -0.25 (-2.10,1.61) | -0.21 (-1.58,1.16) | -0.20 (-1.85,1.46) | -0.20 (-1.86,1.47) | -0.05 (-1.81,1.72) | 0.00 (-1.55,1.55)  | 1 Hz deep rTMS at PT3 (left temporo-parietal cortex) |                                      |                                       |                    |                                        | -0.19 (-1.11,0.74)                                   |                                                    |                    |  |
| *-2.09 (-3.48,-0.70) | *-1.22 (-2.15,-0.29) | -1.19 (-2.42,0.03)   | -1.19 (-2.65,0.28)   | -0.75 (-1.78,0.28)   | -0.48 (-1.59,0.63) | -0.36 (-1.17,0.46)   | -0.33 (-1.11,0.45)   | -0.40 (-1.92,1.13) | -0.33 (-1.91,1.24) | -0.29 (-1.25,0.66) | -0.28 (-1.62,1.05) | -0.28 (-1.63,1.07) | -0.13 (-1.60,1.34) | -0.09 (-1.29,1.12) | -0.09 (-1.52,1.35)                                   | 2 mA Anode tDCS at F3, cathode at F4 |                                       |                    |                                        | -0.09 (-0.54,0.37)                                   |                                                    |                    |  |
| *-2.38 (-4.13,-0.63) | *-1.51 (-2.92,-0.10) | -1.48 (-3.11,0.14)   | -1.48 (-3.29,0.34)   | -1.04 (-2.52,0.44)   | -0.77 (-2.31,0.76) | -0.65 (-1.98,0.69)   | -0.62 (-1.94,0.70)   | -0.69 (-2.55,1.17) | -0.62 (-2.52,1.28) | -0.58 (-2.02,0.85) | -0.57 (-2.28,1.13) | -0.57 (-2.29,1.14) | -0.42 (-2.24,1.39) | -0.38 (-1.98,1.23) | -0.38 (-2.16,1.41)                                   | -0.29 (-1.78,1.20)                   | 2 mA 10Hz tACS at F3Fp1 to T3P3 (TPJ) |                    |                                        | 0.19 (-0.82,1.21)                                    |                                                    | -0.16 (-1.18,0.85) |  |
| *-2.19 (-3.36,-1.02) | *-1.32 (-1.88,-0.76) | *-1.29 (-2.27,-0.31) | *-1.28 (-2.55,-0.02) | *-0.85 (-1.56,-0.13) | -0.58 (-1.40,0.24) | *-0.45 (-0.79,-0.12) | *-0.43 (-0.68,-0.18) | -0.49 (-1.83,0.84) | -0.43 (-1.82,0.96) | -0.39 (-1.00,0.22) | -0.38 (-1.49,0.73) | -0.38 (-1.51,0.75) | -0.23 (-1.50,1.04) | -0.18 (-1.14,0.77) | -0.19 (-1.41,1.04)                                   | -0.10 (-0.84,0.64)                   | 0.19 (-1.10,1.49)                     | Sham               | -0.05 (-0.54,0.44)                     | -0.36 (-1.41,0.70)                                   | -0.35 (-0.97,0.28)                                 |                    |  |
| *-2.25 (-3.55,-0.94) | *-1.37 (-2.17,-0.57) | *-1.35 (-2.48,-0.21) | -1.34 (-2.73,0.05)   | -0.90 (-1.82,0.01)   | -0.64 (-1.64,0.37) | -0.51 (-1.17,0.16)   | -0.48 (-1.11,0.14)   | -0.55 (-2.00,0.91) | -0.49 (-1.99,1.02) | -0.45 (-1.28,0.39) | -0.44 (-1.68,0.81) | -0.44 (-1.70,0.83) | -0.29 (-1.68,1.11) | -0.24 (-1.35,0.87) | -0.24 (-1.59,1.11)                                   | -0.15 (-1.09,0.78)                   | 0.14 (-1.28,1.55)                     | -0.05 (-0.63,0.52) | tTBS at Iz (vermal part of cerebellum) |                                                      |                                                    |                    |  |
| *-2.55 (-4.32,-0.78) | *-1.67 (-3.11,-0.23) | -1.65 (-3.29,0.00)   | -1.64 (-3.47,0.19)   | -1.20 (-2.71,0.30)   | -0.94 (-2.50,0.62) | -0.81 (-2.18,0.56)   | -0.79 (-2.13,0.56)   | -0.85 (-2.73,1.03) | -0.79 (-2.71,1.14) | -0.75 (-2.21,0.71) | -0.74 (-2.47,0.99) | -0.74 (-2.48,1.00) | -0.59 (-2.42,1.25) | -0.54 (-2.17,1.09) | -0.54 (-2.35,1.26)                                   | -0.45 (-1.97,1.06)                   | -0.16 (-1.46,1.13)                    | -0.36 (-1.68,0.97) | -0.30 (-1.74,1.14)                     | 2 mA Cathode tDCS at F3Fp1, anode at T3P3 (left TPJ) |                                                    |                    |  |
| *-2.54 (-4.09,-0.98) | *-1.66 (-2.82,-0.50) | *-1.64 (-3.05,-0.23) | *-1.63 (-3.26,-0.01) | -1.19 (-2.44,0.05)   | -0.93 (-2.24,0.38) | -0.80 (-1.87,0.27)   | -0.78 (-1.82,0.27)   | -0.84 (-2.52,0.84) | -0.78 (-2.50,0.95) | -0.74 (-1.93,0.45) | -0.73 (-2.23,0.78) | -0.73 (-2.25,0.79) | -0.58 (-2.21,1.05) | -0.53 (-1.92,0.86) | -0.53 (-2.13,1.06)                                   | -0.45 (-1.70,0.81)                   | -0.16 (-1.80,1.49)                    | -0.35 (-1.37,0.67) | -0.29 (-1.46,0.87)                     | 0.01 (-1.66,1.68)                                    | Theta-range rTMS at Iz (vermal part of cerebellum) |                    |  |

Pairwise (upper-right portion) and network (lower-left portion) meta-analysis results are presented as estimate effect sizes for the outcome of improvement of negative symptoms in patients with schizophrenia/schizoaffective disorder. Interventions are reported in order of mean ranking of improvement of negative symptoms, and outcomes are expressed as standardized mean difference (SMD) (95% confidence intervals). For the pairwise meta-analyses, SMD of less than 0 indicate that the treatment specified in the row got more improvement than that specified in the column. For the network meta-analysis (NMA), SMD of less than 0 indicate that the treatment specified in the column got more improvement than that specified in the row. Bold results marked with \* indicate statistical significance.







noninvasive brain stimulation; NMA: network meta-analysis; OR: odds ratio; PRISMA: Preferred Reporting Items for Systematic Reviews and Meta-Analyses; prTMS-PT3 + If-rTMS-PT3: 6 Hz priming rTMS at PT3 (left temporo-parietal cortex) + 1 Hz rTMS at PT3; RCT: randomized controlled trial; rTMS: repetitive transcranial magnetic stimulation; SMD: standardized mean difference; SUCRA: surface under the cumulative ranking curve; tACS-F3Fp1-TP3: 2 mA 10Hz tACS at F3Fp1 to T3P3 (TPJ); TBS: theta-burst stimulation; tDCS: transcranial direct current stimulation; the-rTMS-lz : Theta-range rTMS at lz (vermal part of cerebellum); tRNS: transcranial random noise stimulation; tVNS: transcutaneous vagal nerve stimulation; tVNS: tVNS at left auricle; vmPFC: ventromedial prefrontal cortex; VTA: ventral tegmental area

**eTable 7: Inconsistency of different intervention**

Part 1: design-by-treatment and loop inconsistency model

| Inconsistency model | chi <sup>2</sup> | <i>p</i> value of Prob>chi <sup>2</sup> |
|---------------------|------------------|-----------------------------------------|
| Negative symptoms   |                  |                                         |
| design-by-treatment | 2.91             | 0.7139                                  |
| loop inconsistency  | 0.23             | 0.6347                                  |
| Drop-out            |                  |                                         |
| design-by-treatment | 6.57             | 0.2549                                  |
| loop inconsistency  | 0.18             | 0.6747                                  |
| Positive symptoms   |                  |                                         |
| design-by-treatment | 6.47             | 0.1664                                  |
| loop inconsistency  | 0.55             | 0.4603                                  |
| Depressive symptoms |                  |                                         |
| design-by-treatment | 2.13             | 0.1448                                  |
| loop inconsistency  | 2.13             | 0.1448                                  |

Part 2: side-splitting inconsistency model:

Part of negative symptoms

| Side | symmetric |     | nosymmetric |     | Treatments used |
|------|-----------|-----|-------------|-----|-----------------|
|      | P>z       | tau | P>z         | tau |                 |
|      |           |     |             |     |                 |



|       |       |          |       |          |                |                                                                            |
|-------|-------|----------|-------|----------|----------------|----------------------------------------------------------------------------|
| A B * | 0.62  | 0.418279 | .     | .        | A (reference): | Sham                                                                       |
| A C   | .     | .        | .     | .        | B:             | hf (10Hz) rTMS at left DLPFC (F3)                                          |
| A D * | 0.67  | 0.419488 | .     | .        | C:             | extreme hf (20Hz) rTMS at left DLPFC (F3) and right DLPFC (F4)             |
| A E   | .     | .        | .     | .        | D:             | extreme hf (20Hz) rTMS at left DLPFC (F3)                                  |
| A F   | .     | .        | .     | .        | E:             | hf (10Hz) rTMS at left PFC (F3) and right PFC (F4)                         |
| A G   | .     | .        | .     | .        | F:             | High definition 2 mA Anode tRNS at AF3, cathode at AF4, F2, F6, and FC4    |
| A H   | .     | .        | .     | .        | G:             | 2 mA Anode tDCS at F3, cathode at F4                                       |
| A I * | 0.999 | 0.409625 | 0.999 | 0.409625 | H:             | High definition 2 mA Anode tDCS at F3, cathode at AF3, F7, FC5, and FC1    |
| A K   | .     | .        | .     | .        | I:             | 1 Hz rTMS at PT3 (left temporo-parietal cortex)                            |
| A L   | .     | .        | .     | .        | J:             | 6 Hz priming rTMS at PT3 (left temporo-parietal cortex) + 1 Hz rTMS at PT3 |
| A M   | .     | .        | .     | .        | K:             | iTBS at Iz (vermal part of cerebellum)                                     |
| A N   | .     | .        | .     | .        | L:             | 1 Hz deep rTMS at PT3 (left temporo-parietal cortex)                       |
| A O * | 0.131 | 0.396291 | .     | .        | M:             | 20 Hz deep rTMS at left DLPFC (F3)                                         |
| A P   | .     | .        | .     | .        | N:             | 2 mA Anode tDCS at F3, cathode at TP3 (left TPJ)                           |
| A Q   | .     | .        | .     | .        | O:             | iTBS at left DLPFC (F3)                                                    |
| A R   | .     | .        | .     | .        | P:             | 2 mA Anode tDCS at F3Fp1, cathode at T3P3 (left TPJ)                       |
| A S   | .     | .        | .     | .        | Q:             | 2 mA Anode tDCS at F3Fp1, cathode at F4Fp2                                 |
| A T   | .     | .        | .     | .        | R:             | 2 mA Anode tDCS at F3, cathode at Fp2                                      |

|       |       |          |       |          |    |                                                      |
|-------|-------|----------|-------|----------|----|------------------------------------------------------|
| A U   | .     | .        | .     | .        | S: | 2 mA 10Hz tACS at F3Fp1 to T3P3 (TPJ)                |
| A V   | .     | .        | .     | .        | T: | 2 mA Cathode tDCS at F3Fp1, anode at T3P3 (left TPJ) |
| A W   | .     | .        | .     | .        | U: | 1 Hz rTMS at right PFC (F4)                          |
| B D   | 0.557 | 0.416803 | 0.978 | 0.423767 | V: | Theta-range rTMS at Iz (vermal part of cerebellum)   |
| B O   | 0.145 | 0.39596  | 0.284 | 0.406818 | W: | tVNS at left auricle                                 |
| D O   | 0.425 | 0.418696 | 0.284 | 0.406818 |    |                                                      |
| I J * | 0.999 | 0.409625 | .     | .        |    |                                                      |
| S T   | .     | .        | .     | .        |    |                                                      |

Part of drop-out

| Side  | symmetric |          | nosymmetric |          | Treatments used |                                                                         |
|-------|-----------|----------|-------------|----------|-----------------|-------------------------------------------------------------------------|
|       | P>z       | tau      | P>z         | tau      |                 |                                                                         |
| A B * | 0.141     | 1.34E-08 | .           | .        | A (reference):  | Sham                                                                    |
| A C   | .         | .        | .           | .        | B:              | hf (10Hz) rTMS at left DLPFC (F3)                                       |
| A D * | 0.376     | 0.031901 | .           | .        | C:              | tVNS at left auricle                                                    |
| A E   | .         | .        | .           | .        | D:              | extreme hf (20Hz) rTMS at left DLPFC (F3)                               |
| A F   | .         | .        | .           | .        | E:              | hf (10Hz) rTMS at left PFC (F3) and right PFC (F4)                      |
| A G   | .         | .        | .           | .        | F:              | High definition 2 mA Anode tRNS at AF3, cathode at AF4, F2, F6, and FC4 |
| A H   | .         | .        | .           | .        | G:              | 2 mA Anode tDCS at F3, cathode at F4                                    |
| A I * | 1         | 1.58E-08 | 1           | 1.58E-08 | H:              | High definition 2 mA Anode tDCS at F3, cathode at AF3, F7, FC5, and FC1 |
| A K   | .         | .        | .           | .        | I:              | 1 Hz rTMS at PT3 (left temporo-parietal cortex)                         |

|       |       |          |       |          |    |                                                                            |
|-------|-------|----------|-------|----------|----|----------------------------------------------------------------------------|
| A L   | .     | .        | .     | .        | J: | 6 Hz priming rTMS at PT3 (left temporo-parietal cortex) + 1 Hz rTMS at PT3 |
| A M   | .     | .        | .     | .        | K: | iTBS at Iz (vermal part of cerebellum)                                     |
| A N   | .     | .        | .     | .        | L: | 1 Hz deep rTMS at PT3 (left temporo-parietal cortex)                       |
| A O * | 0.396 | 3.19E-06 | .     | .        | M: | Theta-range rTMS at Iz (vermal part of cerebellum)                         |
| A P   | .     | .        | .     | .        | N: | 2 mA Anode tDCS at F3, cathode at TP3 (left TPJ)                           |
| A Q   | .     | .        | .     | .        | O: | iTBS at left DLPFC (F3)                                                    |
| A R   | .     | .        | .     | .        | P: | 2 mA Anode tDCS at F3Fp1, cathode at T3P3 (left TPJ)                       |
| A S   | .     | .        | .     | .        | Q: | 1 Hz rTMS at right PFC (F4)                                                |
| A T   | .     | .        | .     | .        | R: | 2 mA Anode tDCS at F3, cathode at Fp2                                      |
| B D   | 0.129 | 6.92E-08 | 0.086 | 3.36E-09 | S: | 2 mA 10Hz tACS at F3Fp1 to T3P3 (TPJ)                                      |
| B O   | 0.683 | 1.21E-07 | 0.564 | 2.50E-07 | T: | 2 mA Cathode tDCS at F3Fp1, anode at T3P3 (left TPJ)                       |
| D O   | 0.96  | 0.038226 | 0.564 | 2.50E-07 |    |                                                                            |
| I J * | 1     | 2.31E-06 | .     | .        |    |                                                                            |
| S T   | .     | .        | .     | .        |    |                                                                            |

### Part of positive symptoms

| Side  | symmetric |          | nosymmetric |     | Treatments used |                                   |
|-------|-----------|----------|-------------|-----|-----------------|-----------------------------------|
|       | P>z       | tau      | P>z         | tau | A (reference):  |                                   |
| A B * | 0.168     | 0.528915 | .           | .   |                 | Sham                              |
| A C   | .         | .        | .           | .   | B:              | hf (10Hz) rTMS at left DLPFC (F3) |

|       |       |          |       |          |    |                                                                            |
|-------|-------|----------|-------|----------|----|----------------------------------------------------------------------------|
| A D * | 0.281 | 0.543098 | .     | .        | C: | extreme hf (20Hz) rTMS at left DLPFC (F3) and right DLPFC (F4)             |
| A E   | .     | .        | .     | .        | D: | extreme hf (20Hz) rTMS at left DLPFC (F3)                                  |
| A F   | .     | .        | .     | .        | E: | hf (10Hz) rTMS at left PFC (F3) and right PFC (F4)                         |
| A G   | .     | .        | .     | .        | F: | High definition 2 mA Anode tRNS at AF3, cathode at AF4, F2, F6, and FC4    |
| A H   | .     | .        | .     | .        | G: | 2 mA Anode tDCS at F3, cathode at F4                                       |
| A I * | 0.999 | 0.537492 | 0.999 | 0.537492 | H: | High definition 2 mA Anode tDCS at F3, cathode at AF3, F7, FC5, and FC1    |
| A K   | .     | .        | .     | .        | I: | 1 Hz rTMS at PT3 (left temporo-parietal cortex)                            |
| A L   | .     | .        | .     | .        | J: | 6 Hz priming rTMS at PT3 (left temporo-parietal cortex) + 1 Hz rTMS at PT3 |
| A M   | .     | .        | .     | .        | K: | iTBS at Iz (vermal part of cerebellum)                                     |
| A N   | .     | .        | .     | .        | L: | 1 Hz deep rTMS at PT3 (left temporo-parietal cortex)                       |
| A O * | 0.873 | 0.552889 | .     | .        | M: | tVNS at left auricle                                                       |
| A P   | .     | .        | .     | .        | N: | 2 mA Anode tDCS at F3, cathode at TP3 (left TPJ)                           |
| A Q   | .     | .        | .     | .        | O: | iTBS at left DLPFC (F3)                                                    |
| A R   | .     | .        | .     | .        | P: | 2 mA Anode tDCS at F3Fp1, cathode at T3P3 (left TPJ)                       |
| A S   | .     | .        | .     | .        | Q: | 2 mA Anode tDCS at F3Fp1, cathode at F4Fp2                                 |
| A T   | .     | .        | .     | .        | R: | 2 mA Anode tDCS at F3, cathode at Fp2                                      |
| A U   | .     | .        | .     | .        | S: | 2 mA 10Hz tACS at F3Fp1 to T3P3 (TPJ)                                      |

|     |       |          |       |          |    |                                                      |
|-----|-------|----------|-------|----------|----|------------------------------------------------------|
| AV  | .     | .        | .     | .        | T: | 2 mA Cathode tDCS at F3Fp1, anode at T3P3 (left TPJ) |
| BD* | 0.135 | 0.528979 | 0.168 | 0.528915 | U: | 1 Hz rTMS at right PFC (F4)                          |
| BO* | 0.033 | 0.498043 | .     | .        | V: | Theta-range rTMS at Iz (vermal part of cerebellum)   |
| DO* | 0.033 | 0.495534 | .     | .        |    |                                                      |
| IJ* | 0.999 | 0.537492 | .     | .        |    |                                                      |
| ST  | .     | .        | .     | .        |    |                                                      |

Part of depressive symptoms

| Side | symmetric |     | nosymmetric |     | Treatments used |                                                                |
|------|-----------|-----|-------------|-----|-----------------|----------------------------------------------------------------|
|      | P>z       | tau | P>z         | tau |                 |                                                                |
| AB   | .         | .   | .           | .   | A (reference):  | Sham                                                           |
| AC   | .         | .   | .           | .   | B:              | hf (10Hz) rTMS at left DLPFC (F3)                              |
| AD   | .         | .   | .           | .   | C:              | extreme hf (20Hz) rTMS at left DLPFC (F3) and right DLPFC (F4) |
| AE   | .         | .   | .           | .   | D:              | extreme hf (20Hz) rTMS at left DLPFC (F3)                      |
| AF   | .         | .   | .           | .   | E:              | hf (10Hz) rTMS at left PFC (F3) and right PFC (F4)             |
| AG   | .         | .   | .           | .   | F:              | tVNS at left auricle                                           |
| AH   | .         | .   | .           | .   | G:              | 2 mA Anode tDCS at F3, cathode at F4                           |
| AI   | .         | .   | .           | .   | H:              | Theta-range rTMS at Iz (vermal part of cerebellum)             |
| AJ   | .         | .   | .           | .   | I:              | 1 Hz rTMS at right PFC (F4)                                    |
| AK   | .         | .   | .           | .   | J:              | 2 mA Anode tDCS at F3, cathode at Fp2                          |
| AL   | .         | .   | .           | .   | K:              | iTBS at Iz (vermal part of cerebellum)                         |
| AM   | .         | .   | .           | .   | L:              | 2 mA Anode tDCS at F3Fp1, cathode at F4Fp2                     |

|     |   |   |   |   |    |                                                      |
|-----|---|---|---|---|----|------------------------------------------------------|
| A N | . | . | . | . | M: | 20 Hz deep rTMS at left DLPFC (F3)                   |
| A O | . | . | . | . | N: | 2 mA Anode tDCS at F3, cathode at TP3 (left TPJ)     |
|     |   |   |   |   | O: | 2 mA Anode tDCS at F3Fp1, cathode at T3P3 (left TPJ) |

Abbreviation: 95%CI: 95% confidence interval; a-tDCS-F3 + c-tDCS-F4: 2 mA Anode tDCS at F3, cathode at F4; a-tDCS-F3 + c-tDCS-Fp2: 2 mA Anode tDCS at F3, cathode at Fp2; a-tDCS-F3 + c-tDCS-TP3: 2 mA Anode tDCS at F3, cathode at TP3 (left TPJ); a-tDCS-F3Fp1 + c-tDCS-F4Fp2: 2 mA Anode tDCS at F3Fp1, cathode at F4Fp2; a-tDCS-F3Fp1 + c-tDCS-TP3: 2 mA Anode tDCS at F3Fp1, cathode at T3P3 (left TPJ); a-tDCS-TP3 + c-tDCS-F3Fp1: 2 mA Cathode tDCS at F3Fp1, anode at T3P3 (left TPJ); DLPFC: dorsolateral prefrontal cortex; ehf-dTMS-F3: 20 Hz deep rTMS at left DLPFC (F3); ehf-rTMS-F3: extreme hf (20Hz) rTMS at left DLPFC (F3); ehf-rTMS-F3F4: extreme hf (20Hz) rTMS at left DLPFC (F3) and right DLPFC (F4); hd-a-tDCS-F3 + c-tDCS-AF3F7FC5FC1: High definition 2 mA Anode tDCS at F3, cathode at AF3, F7, FC5, and FC1; hd-tRNS-AF3AF4F2F6FC4: High definition 2 mA Anode tRNS at AF3, cathode at AF4, F2, F6, and FC4; hf-rTMS-F3: hf (10Hz) rTMS at left DLPFC (F3); hf-rTMS-F3F4: hf (10Hz) rTMS at left PFC (F3) and right PFC (F4); iTBS: intermittent theta-burst stimulation; iTBS-F3: iTBS at left DLPFC (F3); iTBS-lz : iTBS at lz (vermal part of cerebellum); lf-dTMS-PT3: 1 Hz deep rTMS at PT3 (left temporo-parietal cortex); lf-rTMS-F4: 1 Hz rTMS at right PFC (F4); lf-rTMS-PT3: 1 Hz rTMS at PT3 (left temporo-parietal cortex); MRI: magnetic resonance imaging; NIBS: noninvasive brain stimulation; NMA: network meta-analysis; OR: odds ratio; PRISMA: Preferred Reporting Items for Systematic Reviews and Meta-Analyses; prTMS-PT3 + lf-rTMS-PT3: 6 Hz priming rTMS at PT3 (left temporo-parietal cortex) + 1 Hz rTMS at PT3; RCT: randomized controlled trial; rTMS: repetitive transcranial magnetic stimulation; SMD: standardized mean difference; SUCRA: surface under the cumulative ranking curve; tACS-F3Fp1-TP3: 2 mA 10Hz tACS at F3Fp1 to T3P3 (TPJ); TBS: theta-burst stimulation; tDCS: transcranial direct current stimulation; the-rTMS-lz : Theta-range rTMS at lz (vermal part of cerebellum); tRNS: transcranial random noise stimulation; tVNS: transcutaneous vagal nerve stimulation; tVNS: tVNS at left auricle; vmPFC: ventromedial prefrontal cortex; VTA: ventral tegmental area

**eTable 8A: Estimated between-studies standard deviation of different outcome**

|                     |                                              |  |
|---------------------|----------------------------------------------|--|
| Outcome             | Estimated between-studies standard deviation |  |
| Negative symptoms   | 0.4096253                                    |  |
| Drop-out            | 8.815e-08                                    |  |
| Positive symptoms   | 0.53749165                                   |  |
| Depressive symptoms | 0.18797808                                   |  |

**eTable 8B: Estimated between-treatment heterogeneity**

*Negative symptoms*

|   |   |   | Heterogeneity statistic | degrees of freedom | p value | I-squared | Tau-squared | Treatments used |                                   |
|---|---|---|-------------------------|--------------------|---------|-----------|-------------|-----------------|-----------------------------------|
| B | - | A | 45.98                   | 15                 | 0       | 67.40%    | 0.1645      | A:              | Sham                              |
| C | - | A | 0                       | 0                  | .       | .%        | 0           | B:              | hf-rTMS-F3                        |
| D | - | A | 23.8                    | 7                  | 0.001   | 70.60%    | 0.2051      | C:              | ehf-rTMS-F3F4                     |
| E | - | A | 4.98                    | 1                  | 0.026   | 79.90%    | 0.7871      | D:              | ehf-rTMS-F3                       |
| F | - | A | 0                       | 0                  | .       | .%        | 0           | E:              | ehf-rTMS-F3hf-rTMS-F3F4           |
| G | - | A | 0.04                    | 1                  | 0.84    | 0.00%     | 0           | F:              | hd-tRNS-AF3AF4F2F6FC4             |
| H | - | A | 0                       | 0                  | .       | .%        | 0           | G:              | a-tDCS-F3 + c-tDCS-F4             |
| J | - | I | 0                       | 0                  | .       | .%        | 0           | H:              | hd-a-tDCS-F3 + c-tDCS-AF3F7FC5FC1 |
| K | - | A | 4.32                    | 2                  | 0.116   | 53.70%    | 0.1019      | I:              | lf-rTMS-PT3                       |
| D | - | B | 0.58                    | 2                  | 0.748   | 0.00%     | 0           | J:              | prTMS-PT3 + lf-rTMS-PT3           |

|   |   |   |       |   |       |        |        |    |                             |
|---|---|---|-------|---|-------|--------|--------|----|-----------------------------|
| L | - | A | 0     | 0 | .     | 0.00%  | 0      | K: | iTBS-lz                     |
| M | - | A | 0     | 0 | .     | 0.00%  | 0      | L: | lf-dTMS-PT3                 |
| N | - | A | 0.29  | 1 | 0.593 | 0.00%  | 0      | M: | ehf-dTMS-F3                 |
| I | - | A | 0     | 1 | 0.989 | 0.00%  | 0      | N: | a-tDCS-F3 + c-tDCS-TP3      |
| O | - | A | 23.15 | 2 | 0     | 91.40% | 1.6843 | O: | iTBS-F3                     |
| O | - | B | 3.16  | 1 | 0.075 | 68.40% | 0.2133 | P: | a-tDCS-F3Fp1 + c-tDCS-TP3   |
| O | - | D | 1.08  | 1 | 0.299 | 7.20%  | 0.0077 | Q: | a-tDCS-F3Fp1 + c-tDCS-F4Fp2 |
| P | - | A | 7.36  | 2 | 0.025 | 72.80% | 0.3233 | R: | a-tDCS-F3 + c-tDCS-Fp2      |
| Q | - | A | 0     | 0 | .     | 0.00%  | 0      | S: | tACS-F3Fp1-TP3              |
| R | - | A | 0     | 0 | .     | 0.00%  | 0      | T: | a-tDCS-TP3 + c-tDCS-F3Fp1   |
| S | - | A | 0     | 0 | .     | 0.00%  | 0      | U: | lf-rTMS-F4                  |
| T | - | A | 0     | 0 | .     | 0.00%  | 0      | V: | the-rTMS-lz                 |
| T | - | S | 0     | 0 | .     | 0.00%  | 0      | W: | tVNS                        |
| U | - | A | 0     | 0 | .     | 0.00%  | 0      |    |                             |
| V | - | A | 0     | 0 | .     | 0.00%  | 0      |    |                             |
| W | - | A | 0     | 0 | .     | 0.00%  | 0      |    |                             |

*Drop-out*

|   |   |   | Heterogeneity statistic | degrees of freedom | p value | I-squared | Tau-squared | Treatments used |            |
|---|---|---|-------------------------|--------------------|---------|-----------|-------------|-----------------|------------|
| B | - | A | 2.57                    | 7                  | 0.921   | 0.00%     | 0           | A:              | Sham       |
| D | - | A | 9.23                    | 7                  | 0.236   | 24.20%    | 0.1741      | B:              | hf-rTMS-F3 |



|   |   |   |      |   |       |       |   |    |                                   |
|---|---|---|------|---|-------|-------|---|----|-----------------------------------|
| E | - | A | 0    | 0 | .     | .%    | 0 | C: | tVNS                              |
| F | - | A | 0    | 0 | .     | .%    | 0 | D: | ehf-rTMS-F3                       |
| G | - | A | 0    | 0 | .     | .%    | 0 | E: | ehf-rTMS-F3hf-rTMS-F3F4           |
| H | - | A | 0    | 0 | .     | .%    | 0 | F: | hd-tRNS-AF3AF4F2F6FC4             |
| J | - | I | 0    | 0 | .     | .%    | 0 | G: | a-tDCS-F3 + c-tDCS-F4             |
| K | - | A | 0.69 | 2 | 0.709 | 0.00% | 0 | H: | hd-a-tDCS-F3 + c-tDCS-AF3F7FC5FC1 |
| D | - | B | 0.05 | 2 | 0.974 | 0.00% | 0 | I: | lf-rTMS-PT3                       |
| L | - | A | 0    | 0 | .     | .%    | 0 | J: | prTMS-PT3 + lf-rTMS-PT3           |
| O | - | A | 0.67 | 2 | 0.715 | 0.00% | 0 | K: | iTBS-lz                           |
| O | - | B | 0    | 1 | 0.983 | 0.00% | 0 | L: | lf-dTMS-PT3                       |
| O | - | D | 0.06 | 1 | 0.81  | 0.00% | 0 | M: | the-rTMS-lz                       |
| N | - | A | 0    | 0 | .     | .%    | 0 | N: | a-tDCS-F3 + c-tDCS-TP3            |
| P | - | A | 0    | 0 | .     | .%    | 0 | O: | iTBS-F3                           |
| R | - | A | 0    | 0 | .     | .%    | 0 | P: | a-tDCS-F3Fp1 + c-tDCS-TP3         |
| S | - | A | 0    | 0 | .     | .%    | 0 | Q: | lf-rTMS-F4                        |
| T | - | A | 0    | 0 | .     | .%    | 0 | R: | a-tDCS-F3 + c-tDCS-Fp2            |
| T | - | S | 0    | 0 | .     | .%    | 0 | S: | tACS-F3Fp1-TP3                    |
| Q | - | A | 0    | 0 | .     | .%    | 0 | T: | a-tDCS-TP3 + c-tDCS-F3Fp1         |
| M | - | A | 0    | 0 | .     | .%    | 0 |    |                                   |
| I | - | A | 0    | 0 | .     | .%    | 0 |    |                                   |
| C | - | A | 0    | 0 | .     | .%    | 0 |    |                                   |

*Positive symptoms*

|   |   |   | Heterogeneity statistic | degrees of freedom | p value | I-squared | Tau-squared | Treatments used |                                   |
|---|---|---|-------------------------|--------------------|---------|-----------|-------------|-----------------|-----------------------------------|
| B | - | A | 20.66                   | 14                 | 0.111   | 32.20%    | 0.0366      | A:              | Sham                              |
| C | - | A | 0                       | 0                  | .       | .%        | 0           | B:              | hf-rTMS-F3                        |
| D | - | A | 46.38                   | 7                  | 0       | 84.90%    | 0.4788      | C:              | ehf-rTMS-F3F4                     |
| E | - | A | 1.3                     | 1                  | 0.254   | 23.20%    | 0.0518      | D:              | ehf-rTMS-F3                       |
| F | - | A | 0                       | 0                  | .       | .%        | 0           | E:              | ehf-rTMS-F3hf-rTMS-F3F4           |
| G | - | A | 2.5                     | 1                  | 0.114   | 60.00%    | 0.1923      | F:              | hd-tRNS-AF3AF4F2F6FC4             |
| H | - | A | 0                       | 0                  | .       | .%        | 0           | G:              | a-tDCS-F3 + c-tDCS-F4             |
| J | - | I | 0                       | 0                  | .       | .%        | 0           | H:              | hd-a-tDCS-F3 + c-tDCS-AF3F7FC5FC1 |
| K | - | A | 4.15                    | 2                  | 0.126   | 51.80%    | 0.0949      | I:              | lf-rTMS-PT3                       |
| D | - | B | 59.14                   | 2                  | 0       | 96.60%    | 2.6174      | J:              | prTMS-PT3 + lf-rTMS-PT3           |
| L | - | A | 0                       | 0                  | .       | .%        | 0           | K:              | iTBS-lz                           |
| N | - | A | 0.83                    | 1                  | 0.363   | 0.00%     | 0           | L:              | lf-dTMS-PT3                       |
| I | - | A | 0.16                    | 1                  | 0.691   | 0.00%     | 0           | M:              | tVNS                              |
| O | - | A | 20.24                   | 1                  | 0       | 95.10%    | 2.2097      | N:              | a-tDCS-F3 + c-tDCS-TP3            |
| O | - | B | 30.12                   | 1                  | 0       | 96.70%    | 3.6089      | O:              | iTBS-F3                           |
| O | - | D | 1.49                    | 1                  | 0.222   | 32.80%    | 0.0477      | P:              | a-tDCS-F3Fp1 + c-tDCS-TP3         |
| P | - | A | 3.71                    | 2                  | 0.156   | 46.10%    | 0.0989      | Q:              | a-tDCS-F3Fp1 + c-tDCS-F4Fp2       |
| Q | - | A | 0                       | 0                  | .       | .%        | 0           | R:              | a-tDCS-F3 + c-tDCS-Fp2            |
| R | - | A | 0                       | 0                  | .       | .%        | 0           | S:              | tACS-F3Fp1-TP3                    |

|   |   |   |   |   |   |    |   |    |                           |
|---|---|---|---|---|---|----|---|----|---------------------------|
| S | - | A | 0 | 0 | . | .% | 0 | T: | a-tDCS-TP3 + c-tDCS-F3Fp1 |
| T | - | A | 0 | 0 | . | .% | 0 | U: | lf-rTMS-F4                |
| T | - | S | 0 | 0 | . | .% | 0 | V: | the-rTMS-lz               |
| U | - | A | 0 | 0 | . | .% | 0 |    |                           |
| V | - | A | 0 | 0 | . | .% | 0 |    |                           |
| M | - | A | 0 | 0 | . | .% | 0 |    |                           |

*Depressive symptoms*

|   |   |   | Heterogeneity statistic | degrees of freedom | p value | I-square | Tau-squared | Treatments used |                             |
|---|---|---|-------------------------|--------------------|---------|----------|-------------|-----------------|-----------------------------|
| B | - | A | 10.27                   | 6                  | 0.114   | 41.60%   | 0.0729      | A:              | Sham                        |
| C | - | A | 0                       | 0                  | .       | .%       | 0           | B:              | hf-rTMS-F3                  |
| D | - | A | 0.44                    | 3                  | 0.932   | 0.00%    | 0           | C:              | ehf-rTMS-F3F4               |
| E | - | A | 0.02                    | 1                  | 0.896   | 0.00%    | 0           | D:              | ehf-rTMS-F3                 |
| G | - | A | 4.58                    | 1                  | 0.032   | 78.20%   | 0.4637      | E:              | ehf-rTMS-F3hf-rTMS-F3F4     |
| M | - | A | 0                       | 0                  | .       | .%       | 0           | F:              | tVNS                        |
| N | - | A | 0                       | 0                  | .       | .%       | 0           | G:              | a-tDCS-F3 + c-tDCS-F4       |
| L | - | A | 0                       | 0                  | .       | .%       | 0           | H:              | the-rTMS-lz                 |
| O | - | A | 0                       | 0                  | .       | .%       | 0           | I:              | lf-rTMS-F4                  |
| K | - | A | 0                       | 0                  | .       | .%       | 0           | J:              | a-tDCS-F3 + c-tDCS-Fp2      |
| J | - | A | 0                       | 0                  | .       | .%       | 0           | K:              | iTBS-lz                     |
| I | - | A | 0                       | 0                  | .       | .%       | 0           | L:              | a-tDCS-F3Fp1 + c-tDCS-F4Fp2 |

|   |   |   |   |   |   |    |   |    |                           |
|---|---|---|---|---|---|----|---|----|---------------------------|
| H | - | A | 0 | 0 | . | .% | 0 | M: | ehf-dTMS-F3               |
| F | - | A | 0 | 0 | . | .% | 0 | N: | a-tDCS-F3 + c-tDCS-TP3    |
|   |   |   |   |   |   |    |   | O: | a-tDCS-F3Fp1 + c-tDCS-TP3 |

Abbreviation: 95%CI: 95% confidence interval; a-tDCS-F3 + c-tDCS-F4: 2 mA Anode tDCS at F3, cathode at F4; a-tDCS-F3 + c-tDCS-Fp2: 2 mA Anode tDCS at F3, cathode at Fp2; a-tDCS-F3 + c-tDCS-TP3: 2 mA Anode tDCS at F3, cathode at TP3 (left TPJ); a-tDCS-F3Fp1 + c-tDCS-F4Fp2: 2 mA Anode tDCS at F3Fp1, cathode at F4Fp2; a-tDCS-F3Fp1 + c-tDCS-TP3: 2 mA Anode tDCS at F3Fp1, cathode at T3P3 (left TPJ); a-tDCS-TP3 + c-tDCS-F3Fp1: 2 mA Cathode tDCS at F3Fp1, anode at T3P3 (left TPJ); DLPFC: dorsolateral prefrontal cortex; ehf-dTMS-F3: 20 Hz deep rTMS at left DLPFC (F3); ehf-rTMS-F3: extreme hf (20Hz) rTMS at left DLPFC (F3); ehf-rTMS-F3F4: extreme hf (20Hz) rTMS at left DLPFC (F3) and right DLPFC (F4); hd-a-tDCS-F3 + c-tDCS-AF3F7FC5FC1: High definition 2 mA Anode tDCS at F3, cathode at AF3, F7, FC5, and FC1; hd-tRNS-AF3AF4F2F6FC4: High definition 2 mA Anode tRNS at AF3, cathode at AF4, F2, F6, and FC4; hf-rTMS-F3: hf (10Hz) rTMS at left DLPFC (F3); hf-rTMS-F3F4: hf (10Hz) rTMS at left PFC (F3) and right PFC (F4); iTBS: intermittent theta-burst stimulation; iTBS-F3: iTBS at left DLPFC (F3); iTBS-lz : iTBS at lz (vermal part of cerebellum); lf-dTMS-PT3: 1 Hz deep rTMS at PT3 (left temporo-parietal cortex); lf-rTMS-F4: 1 Hz rTMS at right PFC (F4); lf-rTMS-PT3: 1 Hz rTMS at PT3 (left temporo-parietal cortex); MRI: magnetic resonance imaging; NIBS: noninvasive brain stimulation; NMA: network meta-analysis; OR: odds ratio; PRISMA: Preferred Reporting Items for Systematic Reviews and Meta-Analyses; prTMS-PT3 + lf-rTMS-PT3: 6 Hz priming rTMS at PT3 (left temporo-parietal cortex) + 1 Hz rTMS at PT3; RCT: randomized controlled trial; rTMS: repetitive transcranial magnetic stimulation; SMD: standardized mean difference; SUCRA: surface under the cumulative ranking curve; tACS-F3Fp1-TP3: 2 mA 10Hz tACS at F3Fp1 to T3P3 (TPJ); TBS: theta-burst stimulation; tDCS: transcranial direct current stimulation; the-rTMS-lz : Theta-range rTMS at lz (vermal part of cerebellum); tRNS: transcranial random noise stimulation; tVNS: transcutaneous vagal nerve stimulation; tVNS: tVNS at left auricle; vmPFC: ventromedial prefrontal cortex; VTA: ventral tegmental area

**eTable 9A: Quality of evidence for primary outcome: Change in negative symptoms**

| Comparisons                                                                                                                 | Direct evidence                       |                                     | Indirect evidence              |                                       | Network meta-analysis                 |                             |
|-----------------------------------------------------------------------------------------------------------------------------|---------------------------------------|-------------------------------------|--------------------------------|---------------------------------------|---------------------------------------|-----------------------------|
|                                                                                                                             | Standardized mean difference (95% CI) | The final rating of direct evidence | Co-efficiency (Standard error) | The final rating of indirect evidence | Standardized mean difference (95% CI) | Overall quality of evidence |
| High definition 2 mA Anode tRNS at AF3, cathode at AF4, F2, F6, and FC4 vs iTBS at left DLPFC (F3)                          |                                       |                                     |                                |                                       | -0.87 (-2.18,0.43)                    | ⊕○○○ very low               |
| High definition 2 mA Anode tRNS at AF3, cathode at AF4, F2, F6, and FC4 vs 2 mA Anode tDCS at F3Fp1, cathode at F4Fp2       |                                       |                                     |                                |                                       | -0.90 (-2.43,0.63)                    | ⊕○○○ very low               |
| High definition 2 mA Anode tRNS at AF3, cathode at AF4, F2, F6, and FC4 vs 2 mA Anode tDCS at F3, cathode at Fp2            |                                       |                                     |                                |                                       | -0.91 (-2.63,0.82)                    | ⊕○○○ very low               |
| High definition 2 mA Anode tRNS at AF3, cathode at AF4, F2, F6, and FC4 vs 2 mA Anode tDCS at F3, cathode at TP3 (left TPJ) |                                       |                                     |                                |                                       | -1.34 (-2.72,0.03)                    | ⊕○○○ very low               |

|                                                                                                                                                    |  |  |  |  |                             |               |
|----------------------------------------------------------------------------------------------------------------------------------------------------|--|--|--|--|-----------------------------|---------------|
| High definition 2 mA Anode tRNS at AF3, cathode at AF4, F2, F6, and FC4 vs hf (10Hz) rTMS at left PFC (F3) and right PFC (F4)                      |  |  |  |  | <b>*-1.61 (-3.04,-0.18)</b> | ⊕⊕○○ low      |
| High definition 2 mA Anode tRNS at AF3, cathode at AF4, F2, F6, and FC4 vs extreme hf (20Hz) rTMS at left DLPFC (F3)                               |  |  |  |  | <b>*-1.74 (-2.96,-0.51)</b> | ⊕⊕○○ low      |
| High definition 2 mA Anode tRNS at AF3, cathode at AF4, F2, F6, and FC4 vs hf (10Hz) rTMS at left DLPFC (F3)                                       |  |  |  |  | <b>*-1.76 (-2.96,-0.56)</b> | ⊕⊕○○ low      |
| High definition 2 mA Anode tRNS at AF3, cathode at AF4, F2, F6, and FC4 vs High definition 2 mA Anode tDCS at F3, cathode at AF3, F7, FC5, and FC1 |  |  |  |  | -1.70 (-3.48,0.08)          | ⊕○○○ very low |
| High definition 2 mA Anode tRNS at AF3, cathode at AF4, F2, F6, and FC4 vs 6 Hz priming rTMS at PT3                                                |  |  |  |  | -1.76 (-3.58,0.06)          | ⊕○○○ very low |

|                                                                                                                                           |  |  |  |  |                             |          |
|-------------------------------------------------------------------------------------------------------------------------------------------|--|--|--|--|-----------------------------|----------|
| (left temporo-parietal cortex) + 1 Hz rTMS at PT3                                                                                         |  |  |  |  |                             |          |
| High definition 2 mA Anode tRNS at AF3, cathode at AF4, F2, F6, and FC4 vs 2 mA Anode tDCS at F3Fp1, cathode at T3P3 (left TPJ)           |  |  |  |  | <b>*-1.80 (-3.12,-0.48)</b> | ⊕⊕○○ low |
| High definition 2 mA Anode tRNS at AF3, cathode at AF4, F2, F6, and FC4 vs 20 Hz deep rTMS at left DLPFC (F3)                             |  |  |  |  | <b>*-1.81 (-3.42,-0.19)</b> | ⊕⊕○○ low |
| High definition 2 mA Anode tRNS at AF3, cathode at AF4, F2, F6, and FC4 vs extreme hf (20Hz) rTMS at left DLPFC (F3) and right DLPFC (F4) |  |  |  |  | <b>*-1.81 (-3.44,-0.18)</b> | ⊕⊕○○ low |
| High definition 2 mA Anode tRNS at AF3, cathode at AF4, F2, F6, and FC4 vs tVNS at left auricle                                           |  |  |  |  | <b>*-1.96 (-3.69,-0.23)</b> | ⊕⊕○○ low |
| High definition 2 mA Anode tRNS at AF3, cathode at AF4, F2, F6, and FC4 vs 1 Hz                                                           |  |  |  |  | <b>*-2.01 (-3.70,-0.31)</b> | ⊕⊕○○ low |

|                                                                                                                            |                             |          |  |  |                             |             |
|----------------------------------------------------------------------------------------------------------------------------|-----------------------------|----------|--|--|-----------------------------|-------------|
| deep rTMS at PT3 (left temporo-parietal cortex)                                                                            |                             |          |  |  |                             |             |
| High definition 2 mA Anode tRNS at AF3, cathode at AF4, F2, F6, and FC4 vs 1 Hz rTMS at PT3 (left temporo-parietal cortex) |                             |          |  |  | <b>*-2.01 (-3.52,-0.50)</b> | ⊕⊕○○ low    |
| High definition 2 mA Anode tRNS at AF3, cathode at AF4, F2, F6, and FC4 vs 2 mA Anode tDCS at F3, cathode at F4            |                             |          |  |  | <b>*-2.09 (-3.48,-0.70)</b> | ⊕⊕○○ low    |
| High definition 2 mA Anode tRNS at AF3, cathode at AF4, F2, F6, and FC4 vs 2 mA 10Hz tACS at F3Fp1 to T3P3 (TPJ)           |                             |          |  |  | <b>*-2.38 (-4.13,-0.63)</b> | ⊕⊕○○ low    |
| High definition 2 mA Anode tRNS at AF3, cathode at AF4, F2, F6, and FC4 vs Sham                                            | <b>*-2.19 (-3.05,-1.33)</b> | ⊕⊕○○ low |  |  | <b>*-2.19 (-3.36,-1.02)</b> | ⊕⊕⊕○ medium |
| High definition 2 mA Anode tRNS at AF3, cathode at AF4, F2, F6, and FC4 vs iTBS at lz (vermal part of cerebellum)          |                             |          |  |  | <b>*-2.25 (-3.55,-0.94)</b> | ⊕⊕○○ low    |



|                                                                                                                                 |  |  |  |  |                             |               |
|---------------------------------------------------------------------------------------------------------------------------------|--|--|--|--|-----------------------------|---------------|
| High definition 2 mA Anode tRNS at AF3, cathode at AF4, F2, F6, and FC4 vs 2 mA Cathode tDCS at F3Fp1, anode at T3P3 (left TPJ) |  |  |  |  | <b>*-2.55 (-4.32,-0.78)</b> | ⊕⊕○○ low      |
| High definition 2 mA Anode tRNS at AF3, cathode at AF4, F2, F6, and FC4 vs 1 Hz rTMS at right PFC (F4)                          |  |  |  |  | <b>*-2.53 (-4.12,-0.94)</b> | ⊕⊕○○ low      |
| High definition 2 mA Anode tRNS at AF3, cathode at AF4, F2, F6, and FC4 vs Theta-range rTMS at Iz (vermal part of cerebellum)   |  |  |  |  | <b>*-2.54 (-4.09,-0.98)</b> | ⊕⊕○○ low      |
| iTBS at left DLPFC (F3) vs 2 mA Anode tDCS at F3Fp1, cathode at F4Fp2                                                           |  |  |  |  | -0.02 (-1.15,1.10)          | ⊕○○○ very low |
| iTBS at left DLPFC (F3) vs 2 mA Anode tDCS at F3, cathode at Fp2                                                                |  |  |  |  | -0.03 (-1.42,1.35)          | ⊕○○○ very low |
| iTBS at left DLPFC (F3) vs 2 mA Anode tDCS at F3, cathode at TP3 (left TPJ)                                                     |  |  |  |  | -0.47 (-1.38,0.44)          | ⊕⊕○○ low      |
| iTBS at left DLPFC (F3) vs hf (10Hz)                                                                                            |  |  |  |  | -0.74 (-1.73,0.26)          | ⊕⊕○○ low      |

|                                                                                                       |                             |               |              |             |                             |               |
|-------------------------------------------------------------------------------------------------------|-----------------------------|---------------|--------------|-------------|-----------------------------|---------------|
| rTMS at left PFC (F3) and right PFC (F4)                                                              |                             |               |              |             |                             |               |
| iTBS at left DLPFC (F3) vs extreme hf (20Hz) rTMS at left DLPFC (F3)                                  | <b>*-0.74 (-1.19,-0.28)</b> | ⊕⊕⊕○ medium   | -1.21 (0.53) | ⊕⊕⊕○ medium | <b>*-0.86 (-1.46,-0.27)</b> | ⊕⊕⊕⊕ high     |
| iTBS at left DLPFC (F3) vs hf (10Hz) rTMS at left DLPFC (F3)                                          | -0.60 (-1.37,0.17)          | ⊕○○○ very low | -1.43 (0.47) | ⊕⊕⊕○ medium | <b>*-0.89 (-1.46,-0.31)</b> | ⊕⊕⊕⊕ high     |
| iTBS at left DLPFC (F3) vs High definition 2 mA Anode tDCS at F3, cathode at AF3, F7, FC5, and FC1    |                             |               |              |             | -0.82 (-2.27,0.63)          | ⊕○○○ very low |
| iTBS at left DLPFC (F3) vs 6 Hz priming rTMS at PT3 (left temporo-parietal cortex) + 1 Hz rTMS at PT3 |                             |               |              |             | -0.89 (-2.38,0.61)          | ⊕○○○ very low |
| iTBS at left DLPFC (F3) vs 2 mA Anode tDCS at F3Fp1, cathode at T3P3 (left TPJ)                       |                             |               |              |             | <b>*-0.92 (-1.75,-0.10)</b> | ⊕⊕⊕○ medium   |
| iTBS at left DLPFC (F3) vs 20 Hz deep rTMS at left DLPFC (F3)                                         |                             |               |              |             | -0.93 (-2.18,0.31)          | ⊕○○○ very low |
| iTBS at left DLPFC (F3) vs extreme hf                                                                 |                             |               |              |             | -0.93 (-2.19,0.33)          | ⊕○○○ very low |

|                                                                                 |                             |          |              |             |                             |               |
|---------------------------------------------------------------------------------|-----------------------------|----------|--------------|-------------|-----------------------------|---------------|
| (20Hz) rTMS at left DLPFC (F3) and right DLPFC (F4)                             |                             |          |              |             |                             |               |
| iTBS at left DLPFC (F3) vs tVNS at left auricle                                 |                             |          |              |             | -1.08 (-2.47,0.30)          | ⊕○○○ very low |
| iTBS at left DLPFC (F3) vs 1 Hz deep rTMS at PT3 (left temporo-parietal cortex) |                             |          |              |             | -1.13 (-2.48,0.22)          | ⊕○○○ very low |
| iTBS at left DLPFC (F3) vs 1 Hz rTMS at PT3 (left temporo-parietal cortex)      |                             |          |              |             | <b>*-1.13 (-2.23,-0.03)</b> | ⊕⊕○○ low      |
| iTBS at left DLPFC (F3) vs 2 mA Anode tDCS at F3, cathode at F4                 |                             |          |              |             | <b>*-1.22 (-2.15,-0.29)</b> | ⊕⊕⊕○ medium   |
| iTBS at left DLPFC (F3) vs 2 mA 10Hz tACS at F3Fp1 to T3P3 (TPJ)                |                             |          |              |             | <b>*-1.51 (-2.92,-0.10)</b> | ⊕⊕○○ low      |
| iTBS at left DLPFC (F3) vs Sham                                                 | <b>*-1.62 (-3.17,-0.08)</b> | ⊕⊕○○ low | -0.58 (0.56) | ⊕⊕⊕○ medium | <b>*-1.32 (-1.88,-0.76)</b> | ⊕⊕⊕⊕ high     |
| iTBS at left DLPFC (F3) vs iTBS at Iz (vermal part of cerebellum)               |                             |          |              |             | <b>*-1.37 (-2.17,-0.57)</b> | ⊕⊕⊕○ medium   |
| iTBS at left DLPFC (F3) vs 2 mA Cathode tDCS at F3Fp1, anode at T3P3 (left TPJ) |                             |          |              |             | <b>*-1.67 (-3.11,-0.23)</b> | ⊕⊕○○ low      |

|                                                                                                  |  |  |  |  |                             |               |
|--------------------------------------------------------------------------------------------------|--|--|--|--|-----------------------------|---------------|
| iTBS at left DLPFC (F3) vs 1 Hz rTMS at right PFC (F4)                                           |  |  |  |  | <b>*-1.66 (-2.87,-0.45)</b> | ⊕⊕○○ low      |
| iTBS at left DLPFC (F3) vs Theta-range rTMS at Iz (vermal part of cerebellum)                    |  |  |  |  | <b>*-1.66 (-2.82,-0.50)</b> | ⊕⊕○○ low      |
| 2 mA Anode tDCS at F3Fp1, cathode at F4Fp2 vs 2 mA Anode tDCS at F3, cathode at Fp2              |  |  |  |  | -0.01 (-1.61,1.59)          | ⊕○○○ very low |
| 2 mA Anode tDCS at F3Fp1, cathode at F4Fp2 vs 2 mA Anode tDCS at F3, cathode at TP3 (left TPJ)   |  |  |  |  | -0.44 (-1.66,0.77)          | ⊕○○○ very low |
| 2 mA Anode tDCS at F3Fp1, cathode at F4Fp2 vs hf (10Hz) rTMS at left PFC (F3) and right PFC (F4) |  |  |  |  | -0.71 (-1.99,0.57)          | ⊕○○○ very low |
| 2 mA Anode tDCS at F3Fp1, cathode at F4Fp2 vs extreme hf (20Hz) rTMS at left DLPFC (F3)          |  |  |  |  | -0.84 (-1.87,0.20)          | ⊕○○○ very low |
| 2 mA Anode tDCS at F3Fp1, cathode at F4Fp2 vs hf (10Hz) rTMS at left DLPFC (F3)                  |  |  |  |  | -0.86 (-1.87,0.15)          | ⊕⊕○○ low      |

|                                                                                                                          |  |  |  |  |                    |               |
|--------------------------------------------------------------------------------------------------------------------------|--|--|--|--|--------------------|---------------|
| 2 mA Anode tDCS at F3Fp1, cathode at F4Fp2 vs High definition 2 mA Anode tDCS at F3, cathode at AF3, F7, FC5, and FC1    |  |  |  |  | -0.80 (-2.45,0.86) | ⊕○○○ very low |
| 2 mA Anode tDCS at F3Fp1, cathode at F4Fp2 vs 6 Hz priming rTMS at PT3 (left temporo-parietal cortex) + 1 Hz rTMS at PT3 |  |  |  |  | -0.86 (-2.56,0.84) | ⊕○○○ very low |
| 2 mA Anode tDCS at F3Fp1, cathode at F4Fp2 vs 2 mA Anode tDCS at F3Fp1, cathode at T3P3 (left TPJ)                       |  |  |  |  | -0.90 (-2.05,0.25) | ⊕○○○ very low |
| 2 mA Anode tDCS at F3Fp1, cathode at F4Fp2 vs 20 Hz deep rTMS at left DLPFC (F3)                                         |  |  |  |  | -0.91 (-2.39,0.57) | ⊕○○○ very low |
| 2 mA Anode tDCS at F3Fp1, cathode at F4Fp2 vs extreme hf (20Hz) rTMS at left DLPFC (F3) and right DLPFC (F4)             |  |  |  |  | -0.91 (-2.40,0.58) | ⊕○○○ very low |
| 2 mA Anode tDCS at F3Fp1, cathode at                                                                                     |  |  |  |  | -1.06 (-2.66,0.54) | ⊕○○○ very low |

|                                                                                                    |                             |             |  |  |                             |               |
|----------------------------------------------------------------------------------------------------|-----------------------------|-------------|--|--|-----------------------------|---------------|
| F4Fp2 vs tVNS at left auricle                                                                      |                             |             |  |  |                             |               |
| 2 mA Anode tDCS at F3Fp1, cathode at F4Fp2 vs 1 Hz deep rTMS at PT3 (left temporo-parietal cortex) |                             |             |  |  | -1.11 (-2.67,0.46)          | ⊕○○○ very low |
| 2 mA Anode tDCS at F3Fp1, cathode at F4Fp2 vs 1 Hz rTMS at PT3 (left temporo-parietal cortex)      |                             |             |  |  | -1.11 (-2.47,0.26)          | ⊕○○○ very low |
| 2 mA Anode tDCS at F3Fp1, cathode at F4Fp2 vs 2 mA Anode tDCS at F3, cathode at F4                 |                             |             |  |  | -1.19 (-2.42,0.03)          | ⊕○○○ very low |
| 2 mA Anode tDCS at F3Fp1, cathode at F4Fp2 vs 2 mA 10Hz tACS at F3Fp1 to T3P3 (TPJ)                |                             |             |  |  | -1.48 (-3.11,0.14)          | ⊕○○○ very low |
| 2 mA Anode tDCS at F3Fp1, cathode at F4Fp2 vs Sham                                                 | <b>*-1.29 (-1.85,-0.73)</b> | ⊕⊕⊕○ medium |  |  | <b>*-1.29 (-2.27,-0.31)</b> | ⊕⊕⊕⊕ high     |
| 2 mA Anode tDCS at F3Fp1, cathode at F4Fp2 vs iTBS at Iz (vermal part of cerebellum)               |                             |             |  |  | <b>*-1.35 (-2.48,-0.21)</b> | ⊕⊕○○ low      |
| 2 mA Anode tDCS at F3Fp1, cathode at                                                               |                             |             |  |  | -1.65 (-3.29,0.00)          | ⊕○○○ very low |

|                                                                                                  |  |  |  |  |                             |               |
|--------------------------------------------------------------------------------------------------|--|--|--|--|-----------------------------|---------------|
| F4Fp2 vs 2 mA Cathode tDCS at F3Fp1, anode at T3P3 (left TPJ)                                    |  |  |  |  |                             |               |
| 2 mA Anode tDCS at F3Fp1, cathode at F4Fp2 vs 1 Hz rTMS at right PFC (F4)                        |  |  |  |  | <b>*-1.63 (-3.08,-0.18)</b> | ⊕⊕○○ low      |
| 2 mA Anode tDCS at F3Fp1, cathode at F4Fp2 vs Theta-range rTMS at Iz (vermal part of cerebellum) |  |  |  |  | <b>*-1.64 (-3.05,-0.23)</b> | ⊕⊕○○ low      |
| 2 mA Anode tDCS at F3, cathode at Fp2 vs 2 mA Anode tDCS at F3, cathode at TP3 (left TPJ)        |  |  |  |  | -0.44 (-1.89,1.02)          | ⊕○○○ very low |
| 2 mA Anode tDCS at F3, cathode at Fp2 vs hf (10Hz) rTMS at left PFC (F3) and right PFC (F4)      |  |  |  |  | -0.70 (-2.22,0.81)          | ⊕○○○ very low |
| 2 mA Anode tDCS at F3, cathode at Fp2 vs extreme hf (20Hz) rTMS at left DLPFC (F3)               |  |  |  |  | -0.83 (-2.14,0.48)          | ⊕○○○ very low |
| 2 mA Anode tDCS at F3, cathode at Fp2 vs hf (10Hz) rTMS at left DLPFC (F3)                       |  |  |  |  | -0.86 (-2.15,0.44)          | ⊕○○○ very low |

|                                                                                                                     |  |  |  |  |                    |               |
|---------------------------------------------------------------------------------------------------------------------|--|--|--|--|--------------------|---------------|
| 2 mA Anode tDCS at F3, cathode at Fp2 vs High definition 2 mA Anode tDCS at F3, cathode at AF3, F7, FC5, and FC1    |  |  |  |  | -0.79 (-2.63,1.05) | ⊕○○○ very low |
| 2 mA Anode tDCS at F3, cathode at Fp2 vs 6 Hz priming rTMS at PT3 (left temporo-parietal cortex) + 1 Hz rTMS at PT3 |  |  |  |  | -0.85 (-2.74,1.03) | ⊕○○○ very low |
| 2 mA Anode tDCS at F3, cathode at Fp2 vs 2 mA Anode tDCS at F3Fp1, cathode at T3P3 (left TPJ)                       |  |  |  |  | -0.89 (-2.30,0.51) | ⊕○○○ very low |
| 2 mA Anode tDCS at F3, cathode at Fp2 vs 20 Hz deep rTMS at left DLPFC (F3)                                         |  |  |  |  | -0.90 (-2.59,0.78) | ⊕○○○ very low |
| 2 mA Anode tDCS at F3, cathode at Fp2 vs extreme hf (20Hz) rTMS at left DLPFC (F3) and right DLPFC (F4)             |  |  |  |  | -0.90 (-2.60,0.80) | ⊕○○○ very low |
| 2 mA Anode tDCS at F3, cathode at Fp2 vs tVNS at left auricle                                                       |  |  |  |  | -1.05 (-2.85,0.74) | ⊕○○○ very low |
| 2 mA Anode tDCS at F3, cathode at Fp2 vs 1 Hz deep rTMS at                                                          |  |  |  |  | -1.10 (-2.86,0.66) | ⊕○○○ very low |



|                                                                                               |                             |          |  |  |                             |               |
|-----------------------------------------------------------------------------------------------|-----------------------------|----------|--|--|-----------------------------|---------------|
| PT3 (left temporo-parietal cortex)                                                            |                             |          |  |  |                             |               |
| 2 mA Anode tDCS at F3, cathode at Fp2 vs 1 Hz rTMS at PT3 (left temporo-parietal cortex)      |                             |          |  |  | -1.10 (-2.69,0.48)          | ⊕○○○ very low |
| 2 mA Anode tDCS at F3, cathode at Fp2 vs 2 mA Anode tDCS at F3, cathode at F4                 |                             |          |  |  | -1.19 (-2.65,0.28)          | ⊕○○○ very low |
| 2 mA Anode tDCS at F3, cathode at Fp2 vs 2 mA 10Hz tACS at F3Fp1 to T3P3 (TPJ)                |                             |          |  |  | -1.48 (-3.29,0.34)          | ⊕○○○ very low |
| 2 mA Anode tDCS at F3, cathode at Fp2 vs Sham                                                 | <b>*-1.29 (-2.27,-0.30)</b> | ⊕⊕○○ low |  |  | <b>*-1.28 (-2.55,-0.02)</b> | ⊕⊕⊕○ medium   |
| 2 mA Anode tDCS at F3, cathode at Fp2 vs iTBS at Iz (vermal part of cerebellum)               |                             |          |  |  | -1.34 (-2.73,0.05)          | ⊕○○○ very low |
| 2 mA Anode tDCS at F3, cathode at Fp2 vs 2 mA Cathode tDCS at F3Fp1, anode at T3P3 (left TPJ) |                             |          |  |  | -1.64 (-3.47,0.19)          | ⊕○○○ very low |
| 2 mA Anode tDCS at F3, cathode at Fp2 vs 1 Hz rTMS at right PFC (F4)                          |                             |          |  |  | -1.63 (-3.29,0.03)          | ⊕○○○ very low |
| 2 mA Anode tDCS at F3, cathode at Fp2 vs                                                      |                             |          |  |  | <b>*-1.63 (-3.26,-0.01)</b> | ⊕⊕○○ low      |

|                                                                                                                                |  |  |  |  |                    |               |
|--------------------------------------------------------------------------------------------------------------------------------|--|--|--|--|--------------------|---------------|
| Theta-range rTMS at Iz (vermal part of cerebellum)                                                                             |  |  |  |  |                    |               |
| 2 mA Anode tDCS at F3, cathode at TP3 (left TPJ) vs hf (10Hz) rTMS at left PFC (F3) and right PFC (F4)                         |  |  |  |  | -0.27 (-1.36,0.82) | ⊕○○○ very low |
| 2 mA Anode tDCS at F3, cathode at TP3 (left TPJ) vs extreme hf (20Hz) rTMS at left DLPFC (F3)                                  |  |  |  |  | -0.39 (-1.18,0.40) | ⊕⊕○○ low      |
| 2 mA Anode tDCS at F3, cathode at TP3 (left TPJ) vs hf (10Hz) rTMS at left DLPFC (F3)                                          |  |  |  |  | -0.42 (-1.17,0.34) | ⊕⊕○○ low      |
| 2 mA Anode tDCS at F3, cathode at TP3 (left TPJ) vs High definition 2 mA Anode tDCS at F3, cathode at AF3, F7, FC5, and FC1    |  |  |  |  | -0.35 (-1.87,1.16) | ⊕○○○ very low |
| 2 mA Anode tDCS at F3, cathode at TP3 (left TPJ) vs 6 Hz priming rTMS at PT3 (left temporo-parietal cortex) + 1 Hz rTMS at PT3 |  |  |  |  | -0.42 (-1.98,1.15) | ⊕○○○ very low |

|                                                                                                                    |  |  |  |  |                    |               |
|--------------------------------------------------------------------------------------------------------------------|--|--|--|--|--------------------|---------------|
| 2 mA Anode tDCS at F3, cathode at TP3 (left TPJ) vs 2 mA Anode tDCS at F3Fp1, cathode at T3P3 (left TPJ)           |  |  |  |  | -0.45 (-1.39,0.48) | ⊕⊕○○ low      |
| 2 mA Anode tDCS at F3, cathode at TP3 (left TPJ) vs 20 Hz deep rTMS at left DLPFC (F3)                             |  |  |  |  | -0.47 (-1.79,0.85) | ⊕○○○ very low |
| 2 mA Anode tDCS at F3, cathode at TP3 (left TPJ) vs extreme hf (20Hz) rTMS at left DLPFC (F3) and right DLPFC (F4) |  |  |  |  | -0.46 (-1.80,0.87) | ⊕○○○ very low |
| 2 mA Anode tDCS at F3, cathode at TP3 (left TPJ) vs tVNS at left auricle                                           |  |  |  |  | -0.61 (-2.07,0.84) | ⊕○○○ very low |
| 2 mA Anode tDCS at F3, cathode at TP3 (left TPJ) vs 1 Hz deep rTMS at PT3 (left temporo-parietal cortex)           |  |  |  |  | -0.66 (-2.08,0.76) | ⊕○○○ very low |
| 2 mA Anode tDCS at F3, cathode at TP3 (left TPJ) vs 1 Hz rTMS at PT3 (left temporo-parietal cortex)                |  |  |  |  | -0.66 (-1.85,0.53) | ⊕○○○ very low |

|                                                                                                          |                             |             |  |  |                             |               |
|----------------------------------------------------------------------------------------------------------|-----------------------------|-------------|--|--|-----------------------------|---------------|
| 2 mA Anode tDCS at F3, cathode at TP3 (left TPJ) vs 2 mA Anode tDCS at F3, cathode at F4                 |                             |             |  |  | -0.75 (-1.78,0.28)          | ⊕○○○ very low |
| 2 mA Anode tDCS at F3, cathode at TP3 (left TPJ) vs 2 mA 10Hz tACS at F3Fp1 to T3P3 (TPJ)                |                             |             |  |  | -1.04 (-2.52,0.44)          | ⊕○○○ very low |
| 2 mA Anode tDCS at F3, cathode at TP3 (left TPJ) vs Sham                                                 | <b>*-0.89 (-1.27,-0.52)</b> | ⊕⊕⊕○ medium |  |  | <b>*-0.85 (-1.56,-0.13)</b> | ⊕⊕⊕⊕ high     |
| 2 mA Anode tDCS at F3, cathode at TP3 (left TPJ) vs iTBS at Iz (vermal part of cerebellum)               |                             |             |  |  | -0.90 (-1.82,0.01)          | ⊕⊕○○ low      |
| 2 mA Anode tDCS at F3, cathode at TP3 (left TPJ) vs 2 mA Cathode tDCS at F3Fp1, anode at T3P3 (left TPJ) |                             |             |  |  | -1.20 (-2.71,0.30)          | ⊕○○○ very low |
| 2 mA Anode tDCS at F3, cathode at TP3 (left TPJ) vs 1 Hz rTMS at right PFC (F4)                          |                             |             |  |  | -1.19 (-2.48,0.10)          | ⊕○○○ very low |
| 2 mA Anode tDCS at F3, cathode at TP3 (left TPJ) vs Theta-range rTMS at Iz                               |                             |             |  |  | -1.19 (-2.44,0.05)          | ⊕○○○ very low |

|                                                                                                                                  |  |  |  |  |                    |               |
|----------------------------------------------------------------------------------------------------------------------------------|--|--|--|--|--------------------|---------------|
| (vermal part of cerebellum)                                                                                                      |  |  |  |  |                    |               |
| hf (10Hz) rTMS at left PFC (F3) and right PFC (F4) vs extreme hf (20Hz) rTMS at left DLPFC (F3)                                  |  |  |  |  | -0.13 (-1.02,0.76) | ⊕⊕○○ low      |
| hf (10Hz) rTMS at left PFC (F3) and right PFC (F4) vs hf (10Hz) rTMS at left DLPFC (F3)                                          |  |  |  |  | -0.15 (-1.01,0.71) | ⊕⊕○○ low      |
| hf (10Hz) rTMS at left PFC (F3) and right PFC (F4) vs High definition 2 mA Anode tDCS at F3, cathode at AF3, F7, FC5, and FC1    |  |  |  |  | -0.09 (-1.66,1.48) | ⊕○○○ very low |
| hf (10Hz) rTMS at left PFC (F3) and right PFC (F4) vs 6 Hz priming rTMS at PT3 (left temporo-parietal cortex) + 1 Hz rTMS at PT3 |  |  |  |  | -0.15 (-1.77,1.47) | ⊕○○○ very low |
| hf (10Hz) rTMS at left PFC (F3) and right PFC (F4) vs 2 mA Anode tDCS at F3Fp1, cathode at T3P3 (left TPJ)                       |  |  |  |  | -0.19 (-1.21,0.84) | ⊕○○○ very low |

|                                                                                                                      |  |  |  |  |                    |               |
|----------------------------------------------------------------------------------------------------------------------|--|--|--|--|--------------------|---------------|
| hf (10Hz) rTMS at left PFC (F3) and right PFC (F4) vs 20 Hz deep rTMS at left DLPFC (F3)                             |  |  |  |  | -0.20 (-1.58,1.18) | ⊕○○○ very low |
| hf (10Hz) rTMS at left PFC (F3) and right PFC (F4) vs extreme hf (20Hz) rTMS at left DLPFC (F3) and right DLPFC (F4) |  |  |  |  | -0.20 (-1.59,1.20) | ⊕○○○ very low |
| hf (10Hz) rTMS at left PFC (F3) and right PFC (F4) vs tvNS at left auricle                                           |  |  |  |  | -0.35 (-1.86,1.17) | ⊕○○○ very low |
| hf (10Hz) rTMS at left PFC (F3) and right PFC (F4) vs 1 Hz deep rTMS at PT3 (left temporo-parietal cortex)           |  |  |  |  | -0.40 (-1.87,1.08) | ⊕○○○ very low |
| hf (10Hz) rTMS at left PFC (F3) and right PFC (F4) vs 1 Hz rTMS at PT3 (left temporo-parietal cortex)                |  |  |  |  | -0.40 (-1.65,0.86) | ⊕○○○ very low |
| hf (10Hz) rTMS at left PFC (F3) and right PFC (F4) vs 2 mA Anode tDCS at F3, cathode at F4                           |  |  |  |  | -0.48 (-1.59,0.63) | ⊕○○○ very low |
| hf (10Hz) rTMS at left PFC (F3) and right                                                                            |  |  |  |  | -0.77 (-2.31,0.76) | ⊕○○○ very low |

|                                                                                                            |                    |               |              |             |                    |               |
|------------------------------------------------------------------------------------------------------------|--------------------|---------------|--------------|-------------|--------------------|---------------|
| PFC (F4) vs 2 mA 10Hz tACS at F3Fp1 to T3P3 (TPJ)                                                          |                    |               |              |             |                    |               |
| hf (10Hz) rTMS at left PFC (F3) and right PFC (F4) vs Sham                                                 | -0.67 (-2.04,0.70) | ⊕○○○ very low |              |             | -0.58 (-1.40,0.24) | ⊕⊕○○ low      |
| hf (10Hz) rTMS at left PFC (F3) and right PFC (F4) vs iTBS at lz (vermal part of cerebellum)               |                    |               |              |             | -0.64 (-1.64,0.37) | ⊕○○○ very low |
| hf (10Hz) rTMS at left PFC (F3) and right PFC (F4) vs 2 mA Cathode tDCS at F3Fp1, anode at T3P3 (left TPJ) |                    |               |              |             | -0.94 (-2.50,0.62) | ⊕○○○ very low |
| hf (10Hz) rTMS at left PFC (F3) and right PFC (F4) vs 1 Hz rTMS at right PFC (F4)                          |                    |               |              |             | -0.92 (-2.27,0.43) | ⊕○○○ very low |
| hf (10Hz) rTMS at left PFC (F3) and right PFC (F4) vs Theta-range rTMS at lz (vermal part of cerebellum)   |                    |               |              |             | -0.93 (-2.24,0.38) | ⊕○○○ very low |
| extreme hf (20Hz) rTMS at left DLPFC (F3) vs hf (10Hz) rTMS at left DLPFC (F3)                             | 0.09 (-0.22,0.39)  | ⊕⊕○○ low      | -0.13 (0.27) | ⊕⊕⊕○ medium | -0.02 (-0.41,0.36) | ⊕⊕⊕⊕ high     |

|                                                                                                                         |  |  |  |  |                    |               |
|-------------------------------------------------------------------------------------------------------------------------|--|--|--|--|--------------------|---------------|
| extreme hf (20Hz) rTMS at left DLPFC (F3) vs High definition 2 mA Anode tDCS at F3, cathode at AF3, F7, FC5, and FC1    |  |  |  |  | 0.04 (-1.34,1.42)  | ⊕○○○ very low |
| extreme hf (20Hz) rTMS at left DLPFC (F3) vs 6 Hz priming rTMS at PT3 (left temporo-parietal cortex) + 1 Hz rTMS at PT3 |  |  |  |  | -0.02 (-1.46,1.41) | ⊕○○○ very low |
| extreme hf (20Hz) rTMS at left DLPFC (F3) vs 2 mA Anode tDCS at F3Fp1, cathode at T3P3 (left TPJ)                       |  |  |  |  | -0.06 (-0.76,0.63) | ⊕⊕○○ low      |
| extreme hf (20Hz) rTMS at left DLPFC (F3) vs 20 Hz deep rTMS at left DLPFC (F3)                                         |  |  |  |  | -0.07 (-1.23,1.09) | ⊕○○○ very low |
| extreme hf (20Hz) rTMS at left DLPFC (F3) vs extreme hf (20Hz) rTMS at left DLPFC (F3) and right DLPFC (F4)             |  |  |  |  | -0.07 (-1.25,1.11) | ⊕○○○ very low |
| extreme hf (20Hz) rTMS at left DLPFC                                                                                    |  |  |  |  | -0.22 (-1.54,1.09) | ⊕○○○ very low |



|                                                                                                   |                             |             |              |             |                             |               |
|---------------------------------------------------------------------------------------------------|-----------------------------|-------------|--------------|-------------|-----------------------------|---------------|
| (F3) vs tVNS at left auricle                                                                      |                             |             |              |             |                             |               |
| extreme hf (20Hz) rTMS at left DLPFC (F3) vs 1 Hz deep rTMS at PT3 (left temporo-parietal cortex) |                             |             |              |             | -0.27 (-1.54,1.00)          | ⊕○○○ very low |
| extreme hf (20Hz) rTMS at left DLPFC (F3) vs 1 Hz rTMS at PT3 (left temporo-parietal cortex)      |                             |             |              |             | -0.27 (-1.28,0.74)          | ⊕○○○ very low |
| extreme hf (20Hz) rTMS at left DLPFC (F3) vs 2 mA Anode tDCS at F3, cathode at F4                 |                             |             |              |             | -0.36 (-1.17,0.46)          | ⊕⊕○○ low      |
| extreme hf (20Hz) rTMS at left DLPFC (F3) vs 2 mA 10Hz tACS at F3Fp1 to T3P3 (TPJ)                |                             |             |              |             | -0.65 (-1.98,0.69)          | ⊕○○○ very low |
| extreme hf (20Hz) rTMS at left DLPFC (F3) vs Sham                                                 | <b>*-0.48 (-0.87,-0.10)</b> | ⊕⊕⊕○ medium | -0.23 (0.56) | ⊕⊕⊕○ medium | <b>*-0.45 (-0.79,-0.12)</b> | ⊕⊕⊕⊕ high     |
| extreme hf (20Hz) rTMS at left DLPFC (F3) vs iTBS at Iz (vermal part of cerebellum)               |                             |             |              |             | -0.51 (-1.17,0.16)          | ⊕⊕○○ low      |
| extreme hf (20Hz) rTMS at left DLPFC                                                              |                             |             |              |             | -0.81 (-2.18,0.56)          | ⊕○○○ very low |

|                                                                                                                 |  |  |  |  |                    |               |
|-----------------------------------------------------------------------------------------------------------------|--|--|--|--|--------------------|---------------|
| (F3) vs 2 mA Cathode tDCS at F3Fp1, anode at T3P3 (left TPJ)                                                    |  |  |  |  |                    |               |
| extreme hf (20Hz) rTMS at left DLPFC (F3) vs 1 Hz rTMS at right PFC (F4)                                        |  |  |  |  | -0.79 (-1.92,0.33) | ⊕○○○ very low |
| extreme hf (20Hz) rTMS at left DLPFC (F3) vs Theta-range rTMS at lz (vermal part of cerebellum)                 |  |  |  |  | -0.80 (-1.87,0.27) | ⊕○○○ very low |
| hf (10Hz) rTMS at left DLPFC (F3) vs High definition 2 mA Anode tDCS at F3, cathode at AF3, F7, FC5, and FC1    |  |  |  |  | 0.06 (-1.30,1.42)  | ⊕○○○ very low |
| hf (10Hz) rTMS at left DLPFC (F3) vs 6 Hz priming rTMS at PT3 (left temporo-parietal cortex) + 1 Hz rTMS at PT3 |  |  |  |  | 0.00 (-1.41,1.41)  | ⊕○○○ very low |
| hf (10Hz) rTMS at left DLPFC (F3) vs 2 mA Anode tDCS at F3Fp1, cathode at T3P3 (left TPJ)                       |  |  |  |  | -0.04 (-0.69,0.62) | ⊕⊕○○ low      |
| hf (10Hz) rTMS at left DLPFC (F3) vs 20 Hz deep rTMS at left DLPFC (F3)                                         |  |  |  |  | -0.05 (-1.19,1.09) | ⊕○○○ very low |

|                                                                                                     |                             |             |              |             |                             |               |
|-----------------------------------------------------------------------------------------------------|-----------------------------|-------------|--------------|-------------|-----------------------------|---------------|
| hf (10Hz) rTMS at left DLPFC (F3) vs extreme hf (20Hz) rTMS at left DLPFC (F3) and right DLPFC (F4) |                             |             |              |             | -0.05 (-1.20,1.11)          | ⊕○○○ very low |
| hf (10Hz) rTMS at left DLPFC (F3) vs tVNS at left auricle                                           |                             |             |              |             | -0.20 (-1.49,1.10)          | ⊕○○○ very low |
| hf (10Hz) rTMS at left DLPFC (F3) vs 1 Hz deep rTMS at PT3 (left temporo-parietal cortex)           |                             |             |              |             | -0.24 (-1.50,1.01)          | ⊕○○○ very low |
| hf (10Hz) rTMS at left DLPFC (F3) vs 1 Hz rTMS at PT3 (left temporo-parietal cortex)                |                             |             |              |             | -0.25 (-1.23,0.74)          | ⊕⊕○○ low      |
| hf (10Hz) rTMS at left DLPFC (F3) vs 2 mA Anode tDCS at F3, cathode at F4                           |                             |             |              |             | -0.33 (-1.11,0.45)          | ⊕⊕○○ low      |
| hf (10Hz) rTMS at left DLPFC (F3) vs 2 mA 10Hz tACS at F3Fp1 to T3P3 (TPJ)                          |                             |             |              |             | -0.62 (-1.94,0.70)          | ⊕○○○ very low |
| hf (10Hz) rTMS at left DLPFC (F3) vs Sham                                                           | <b>*-0.42 (-0.67,-0.17)</b> | ⊕⊕⊕○ medium | -0.75 (0.65) | ⊕⊕⊕○ medium | <b>*-0.43 (-0.68,-0.18)</b> | ⊕⊕⊕⊕ high     |
| hf (10Hz) rTMS at left DLPFC (F3) vs iTBS at lz (vermal part of cerebellum)                         |                             |             |              |             | -0.48 (-1.11,0.14)          | ⊕⊕○○ low      |

|                                                                                                                                                       |  |  |  |  |                    |               |
|-------------------------------------------------------------------------------------------------------------------------------------------------------|--|--|--|--|--------------------|---------------|
| hf (10Hz) rTMS at left DLPFC (F3) vs 2 mA Cathode tDCS at F3Fp1, anode at T3P3 (left TPJ)                                                             |  |  |  |  | -0.79 (-2.13,0.56) | ⊕○○○ very low |
| hf (10Hz) rTMS at left DLPFC (F3) vs 1 Hz rTMS at right PFC (F4)                                                                                      |  |  |  |  | -0.77 (-1.87,0.33) | ⊕○○○ very low |
| hf (10Hz) rTMS at left DLPFC (F3) vs Theta-range rTMS at Iz (vermal part of cerebellum)                                                               |  |  |  |  | -0.78 (-1.82,0.27) | ⊕○○○ very low |
| High definition 2 mA Anode tDCS at F3, cathode at AF3, F7, FC5, and FC1 vs 6 Hz priming rTMS at PT3 (left temporo-parietal cortex) + 1 Hz rTMS at PT3 |  |  |  |  | -0.06 (-1.99,1.87) | ⊕○○○ very low |
| High definition 2 mA Anode tDCS at F3, cathode at AF3, F7, FC5, and FC1 vs 2 mA Anode tDCS at F3Fp1, cathode at T3P3 (left TPJ)                       |  |  |  |  | -0.10 (-1.57,1.37) | ⊕○○○ very low |
| High definition 2 mA Anode tDCS at F3, cathode at AF3, F7, FC5, and FC1 vs 20 Hz                                                                      |  |  |  |  | -0.11 (-1.85,1.62) | ⊕○○○ very low |

|                                                                                                                                           |  |  |  |  |                    |               |
|-------------------------------------------------------------------------------------------------------------------------------------------|--|--|--|--|--------------------|---------------|
| deep rTMS at left DLPFC (F3)                                                                                                              |  |  |  |  |                    |               |
| High definition 2 mA Anode tDCS at F3, cathode at AF3, F7, FC5, and FC1 vs extreme hf (20Hz) rTMS at left DLPFC (F3) and right DLPFC (F4) |  |  |  |  | -0.11 (-1.86,1.64) | ⊕○○○ very low |
| High definition 2 mA Anode tDCS at F3, cathode at AF3, F7, FC5, and FC1 vs tVNS at left auricle                                           |  |  |  |  | -0.26 (-2.11,1.58) | ⊕○○○ very low |
| High definition 2 mA Anode tDCS at F3, cathode at AF3, F7, FC5, and FC1 vs 1 Hz deep rTMS at PT3 (left temporo-parietal cortex)           |  |  |  |  | -0.31 (-2.12,1.50) | ⊕○○○ very low |
| High definition 2 mA Anode tDCS at F3, cathode at AF3, F7, FC5, and FC1 vs 1 Hz rTMS at PT3 (left temporo-parietal cortex)                |  |  |  |  | -0.31 (-1.95,1.33) | ⊕○○○ very low |
| High definition 2 mA Anode tDCS at F3, cathode at AF3, F7, FC5, and FC1 vs 2 mA                                                           |  |  |  |  | -0.40 (-1.92,1.13) | ⊕○○○ very low |

|                                                                                                                                 |                    |               |  |  |                    |               |
|---------------------------------------------------------------------------------------------------------------------------------|--------------------|---------------|--|--|--------------------|---------------|
| Anode tDCS at F3, cathode at F4                                                                                                 |                    |               |  |  |                    |               |
| High definition 2 mA Anode tDCS at F3, cathode at AF3, F7, FC5, and FC1 vs 2 mA 10Hz tACS at F3Fp1 to T3P3 (TPJ)                |                    |               |  |  | -0.69 (-2.55,1.17) | ⊕○○○ very low |
| High definition 2 mA Anode tDCS at F3, cathode at AF3, F7, FC5, and FC1 vs Sham                                                 | -0.49 (-1.56,0.58) | ⊕○○○ very low |  |  | -0.49 (-1.83,0.84) | ⊕⊕○○ low      |
| High definition 2 mA Anode tDCS at F3, cathode at AF3, F7, FC5, and FC1 vs iTBS at Iz (vermal part of cerebellum)               |                    |               |  |  | -0.55 (-2.00,0.91) | ⊕○○○ very low |
| High definition 2 mA Anode tDCS at F3, cathode at AF3, F7, FC5, and FC1 vs 2 mA Cathode tDCS at F3Fp1, anode at T3P3 (left TPJ) |                    |               |  |  | -0.85 (-2.73,1.03) | ⊕○○○ very low |
| High definition 2 mA Anode tDCS at F3, cathode at AF3, F7, FC5, and FC1 vs 1 Hz rTMS at right PFC (F4)                          |                    |               |  |  | -0.84 (-2.55,0.88) | ⊕○○○ very low |
| High definition 2 mA Anode tDCS at F3, cathode at AF3, F7,                                                                      |                    |               |  |  | -0.84 (-2.52,0.84) | ⊕○○○ very low |

|                                                                                                                                              |  |  |  |  |                    |               |
|----------------------------------------------------------------------------------------------------------------------------------------------|--|--|--|--|--------------------|---------------|
| FC5, and FC1 vs Theta-range rTMS at Iz (vermal part of cerebellum)                                                                           |  |  |  |  |                    |               |
| 6 Hz priming rTMS at PT3 (left temporo-parietal cortex) + 1 Hz rTMS at PT3 vs 2 mA Anode tDCS at F3Fp1, cathode at T3P3 (left TPJ)           |  |  |  |  | -0.04 (-1.56,1.48) | ⊕○○○ very low |
| 6 Hz priming rTMS at PT3 (left temporo-parietal cortex) + 1 Hz rTMS at PT3 vs 20 Hz deep rTMS at left DLPFC (F3)                             |  |  |  |  | -0.05 (-1.83,1.73) | ⊕○○○ very low |
| 6 Hz priming rTMS at PT3 (left temporo-parietal cortex) + 1 Hz rTMS at PT3 vs extreme hf (20Hz) rTMS at left DLPFC (F3) and right DLPFC (F4) |  |  |  |  | -0.05 (-1.84,1.74) | ⊕○○○ very low |
| 6 Hz priming rTMS at PT3 (left temporo-parietal cortex) + 1 Hz rTMS at PT3 vs tVNS at left auricle                                           |  |  |  |  | -0.20 (-2.08,1.69) | ⊕○○○ very low |
| 6 Hz priming rTMS at PT3 (left temporo-parietal cortex) + 1 Hz rTMS at PT3 vs tVNS at left auricle                                           |  |  |  |  | -0.25 (-2.10,1.61) | ⊕○○○ very low |

|                                                                                                                               |                    |          |               |               |                    |               |
|-------------------------------------------------------------------------------------------------------------------------------|--------------------|----------|---------------|---------------|--------------------|---------------|
| Hz rTMS at PT3 vs 1 Hz deep rTMS at PT3 (left temporo-parietal cortex)                                                        |                    |          |               |               |                    |               |
| 6 Hz priming rTMS at PT3 (left temporo-parietal cortex) + 1 Hz rTMS at PT3 vs 1 Hz rTMS at PT3 (left temporo-parietal cortex) | -0.25 (-0.87,0.38) | ⊕⊕○○ low | 0.37 (629.80) | ⊕○○○ very low | -0.25 (-1.26,0.77) | ⊕⊕⊕⊕ high     |
| 6 Hz priming rTMS at PT3 (left temporo-parietal cortex) + 1 Hz rTMS at PT3 vs 2 mA Anode tDCS at F3, cathode at F4            |                    |          |               |               | -0.33 (-1.91,1.24) | ⊕○○○ very low |
| 6 Hz priming rTMS at PT3 (left temporo-parietal cortex) + 1 Hz rTMS at PT3 vs 2 mA 10Hz tACS at F3Fp1 to T3P3 (TPJ)           |                    |          |               |               | -0.62 (-2.52,1.28) | ⊕○○○ very low |
| 6 Hz priming rTMS at PT3 (left temporo-parietal cortex) + 1 Hz rTMS at PT3 vs Sham                                            |                    |          |               |               | -0.43 (-1.82,0.96) | ⊕○○○ very low |
| 6 Hz priming rTMS at PT3 (left temporo-parietal cortex) + 1 Hz rTMS at PT3 vs                                                 |                    |          |               |               | -0.49 (-1.99,1.02) | ⊕○○○ very low |



|                                                                                                                                    |  |  |  |  |                    |               |
|------------------------------------------------------------------------------------------------------------------------------------|--|--|--|--|--------------------|---------------|
| iTBS at lz (vermal part of cerebellum)                                                                                             |  |  |  |  |                    |               |
| 6 Hz priming rTMS at PT3 (left temporo-parietal cortex) + 1 Hz rTMS at PT3 vs 2 mA Cathode tDCS at F3Fp1, anode at T3P3 (left TPJ) |  |  |  |  | -0.79 (-2.71,1.14) | ⊕○○○ very low |
| 6 Hz priming rTMS at PT3 (left temporo-parietal cortex) + 1 Hz rTMS at PT3 vs 1 Hz rTMS at right PFC (F4)                          |  |  |  |  | -0.77 (-2.53,0.98) | ⊕○○○ very low |
| 6 Hz priming rTMS at PT3 (left temporo-parietal cortex) + 1 Hz rTMS at PT3 vs Theta-range rTMS at lz (vermal part of cerebellum)   |  |  |  |  | -0.78 (-2.50,0.95) | ⊕○○○ very low |
| 2 mA Anode tDCS at F3Fp1, cathode at T3P3 (left TPJ) vs 20 Hz deep rTMS at left DLPFC (F3)                                         |  |  |  |  | -0.01 (-1.28,1.25) | ⊕○○○ very low |
| 2 mA Anode tDCS at F3Fp1, cathode at T3P3 (left TPJ) vs extreme hf (20Hz) rTMS at left DLPFC                                       |  |  |  |  | -0.01 (-1.29,1.27) | ⊕○○○ very low |

|                                                                                                              |                    |          |  |  |                    |               |
|--------------------------------------------------------------------------------------------------------------|--------------------|----------|--|--|--------------------|---------------|
| (F3) and right DLPFC (F4)                                                                                    |                    |          |  |  |                    |               |
| 2 mA Anode tDCS at F3Fp1, cathode at T3P3 (left TPJ) vs tVNS at left auricle                                 |                    |          |  |  | -0.16 (-1.57,1.25) | ⊕○○○ very low |
| 2 mA Anode tDCS at F3Fp1, cathode at T3P3 (left TPJ) vs 1 Hz deep rTMS at PT3 (left temporo-parietal cortex) |                    |          |  |  | -0.21 (-1.58,1.16) | ⊕○○○ very low |
| 2 mA Anode tDCS at F3Fp1, cathode at T3P3 (left TPJ) vs 1 Hz rTMS at PT3 (left temporo-parietal cortex)      |                    |          |  |  | -0.21 (-1.34,0.92) | ⊕○○○ very low |
| 2 mA Anode tDCS at F3Fp1, cathode at T3P3 (left TPJ) vs 2 mA Anode tDCS at F3, cathode at F4                 |                    |          |  |  | -0.29 (-1.25,0.66) | ⊕⊕○○ low      |
| 2 mA Anode tDCS at F3Fp1, cathode at T3P3 (left TPJ) vs 2 mA 10Hz tACS at F3Fp1 to T3P3 (TPJ)                |                    |          |  |  | -0.58 (-2.02,0.85) | ⊕○○○ very low |
| 2 mA Anode tDCS at F3Fp1, cathode at T3P3 (left TPJ) vs Sham                                                 | -0.39 (-1.14,0.37) | ⊕⊕○○ low |  |  | -0.39 (-1.00,0.22) | ⊕⊕○○ low      |

|                                                                                                              |  |  |  |  |                    |               |
|--------------------------------------------------------------------------------------------------------------|--|--|--|--|--------------------|---------------|
| 2 mA Anode tDCS at F3Fp1, cathode at T3P3 (left TPJ) vs iTBS at Iz (vermal part of cerebellum)               |  |  |  |  | -0.45 (-1.28,0.39) | ⊕○○○ very low |
| 2 mA Anode tDCS at F3Fp1, cathode at T3P3 (left TPJ) vs 2 mA Cathode tDCS at F3Fp1, anode at T3P3 (left TPJ) |  |  |  |  | -0.75 (-2.21,0.71) | ⊕○○○ very low |
| 2 mA Anode tDCS at F3Fp1, cathode at T3P3 (left TPJ) vs 1 Hz rTMS at right PFC (F4)                          |  |  |  |  | -0.73 (-1.97,0.50) | ⊕○○○ very low |
| 2 mA Anode tDCS at F3Fp1, cathode at T3P3 (left TPJ) vs Theta-range rTMS at Iz (vermal part of cerebellum)   |  |  |  |  | -0.74 (-1.93,0.45) | ⊕○○○ very low |
| 20 Hz deep rTMS at left DLPFC (F3) vs extreme hf (20Hz) rTMS at left DLPFC (F3) and right DLPFC (F4)         |  |  |  |  | 0.00 (-1.58,1.58)  | ⊕○○○ very low |
| 20 Hz deep rTMS at left DLPFC (F3) vs tVNS at left auricle                                                   |  |  |  |  | -0.15 (-1.84,1.54) | ⊕○○○ very low |
| 20 Hz deep rTMS at left DLPFC (F3) vs 1 Hz deep rTMS at PT3                                                  |  |  |  |  | -0.20 (-1.85,1.46) | ⊕○○○ very low |

|                                                                                            |                    |          |  |  |                    |               |
|--------------------------------------------------------------------------------------------|--------------------|----------|--|--|--------------------|---------------|
| (left temporo-parietal cortex)                                                             |                    |          |  |  |                    |               |
| 20 Hz deep rTMS at left DLPFC (F3) vs 1 Hz rTMS at PT3 (left temporo-parietal cortex)      |                    |          |  |  | -0.20 (-1.66,1.26) | ⊕○○○ very low |
| 20 Hz deep rTMS at left DLPFC (F3) vs 2 mA Anode tDCS at F3, cathode at F4                 |                    |          |  |  | -0.28 (-1.62,1.05) | ⊕○○○ very low |
| 20 Hz deep rTMS at left DLPFC (F3) vs 2 mA 10Hz tACS at F3Fp1 to T3P3 (TPJ)                |                    |          |  |  | -0.57 (-2.28,1.13) | ⊕○○○ very low |
| 20 Hz deep rTMS at left DLPFC (F3) vs Sham                                                 | -0.38 (-1.15,0.39) | ⊕⊕○○ low |  |  | -0.38 (-1.49,0.73) | ⊕⊕○○ low      |
| 20 Hz deep rTMS at left DLPFC (F3) vs iTBS at Iz (vermal part of cerebellum)               |                    |          |  |  | -0.44 (-1.68,0.81) | ⊕○○○ very low |
| 20 Hz deep rTMS at left DLPFC (F3) vs 2 mA Cathode tDCS at F3Fp1, anode at T3P3 (left TPJ) |                    |          |  |  | -0.74 (-2.47,0.99) | ⊕○○○ very low |
| 20 Hz deep rTMS at left DLPFC (F3) vs 1 Hz rTMS at right PFC (F4)                          |                    |          |  |  | -0.72 (-2.26,0.82) | ⊕○○○ very low |
| 20 Hz deep rTMS at left DLPFC (F3) vs                                                      |                    |          |  |  | -0.73 (-2.23,0.78) | ⊕○○○ very low |

|                                                                                                                        |  |  |  |  |                    |               |
|------------------------------------------------------------------------------------------------------------------------|--|--|--|--|--------------------|---------------|
| Theta-range rTMS at Iz (vermal part of cerebellum)                                                                     |  |  |  |  |                    |               |
| extreme hf (20Hz) rTMS at left DLPFC (F3) and right DLPFC (F4) vs tVNS at left auricle                                 |  |  |  |  | -0.15 (-1.85,1.55) | ⊕○○○ very low |
| extreme hf (20Hz) rTMS at left DLPFC (F3) and right DLPFC (F4) vs 1 Hz deep rTMS at PT3 (left temporo-parietal cortex) |  |  |  |  | -0.20 (-1.86,1.47) | ⊕○○○ very low |
| extreme hf (20Hz) rTMS at left DLPFC (F3) and right DLPFC (F4) vs 1 Hz rTMS at PT3 (left temporo-parietal cortex)      |  |  |  |  | -0.20 (-1.67,1.28) | ⊕○○○ very low |
| extreme hf (20Hz) rTMS at left DLPFC (F3) and right DLPFC (F4) vs 2 mA Anode tDCS at F3, cathode at F4                 |  |  |  |  | -0.28 (-1.63,1.07) | ⊕○○○ very low |
| extreme hf (20Hz) rTMS at left DLPFC (F3) and right DLPFC (F4) vs 2 mA 10Hz tACS at F3Fp1 to T3P3 (TPJ)                |  |  |  |  | -0.57 (-2.29,1.14) | ⊕○○○ very low |

|                                                                                                                        |                    |          |  |  |                    |               |
|------------------------------------------------------------------------------------------------------------------------|--------------------|----------|--|--|--------------------|---------------|
| extreme hf (20Hz) rTMS at left DLPFC (F3) and right DLPFC (F4) vs Sham                                                 | -0.38 (-1.18,0.41) | ⊕⊕○○ low |  |  | -0.38 (-1.51,0.75) | ⊕⊕○○ low      |
| extreme hf (20Hz) rTMS at left DLPFC (F3) and right DLPFC (F4) vs iTBS at Iz (vermal part of cerebellum)               |                    |          |  |  | -0.44 (-1.70,0.83) | ⊕○○○ very low |
| extreme hf (20Hz) rTMS at left DLPFC (F3) and right DLPFC (F4) vs 2 mA Cathode tDCS at F3Fp1, anode at T3P3 (left TPJ) |                    |          |  |  | -0.74 (-2.48,1.00) | ⊕○○○ very low |
| extreme hf (20Hz) rTMS at left DLPFC (F3) and right DLPFC (F4) vs 1 Hz rTMS at right PFC (F4)                          |                    |          |  |  | -0.72 (-2.28,0.83) | ⊕○○○ very low |
| extreme hf (20Hz) rTMS at left DLPFC (F3) and right DLPFC (F4) vs Theta-range rTMS at Iz (vermal part of cerebellum)   |                    |          |  |  | -0.73 (-2.25,0.79) | ⊕○○○ very low |
| tVNS at left auricle vs 1 Hz deep rTMS at PT3 (left temporo-parietal cortex)                                           |                    |          |  |  | -0.05 (-1.81,1.72) | ⊕○○○ very low |
| tVNS at left auricle vs 1 Hz rTMS at PT3 (left                                                                         |                    |          |  |  | -0.05 (-1.63,1.54) | ⊕○○○ very low |

|                                                                                                         |                    |               |  |  |                    |               |
|---------------------------------------------------------------------------------------------------------|--------------------|---------------|--|--|--------------------|---------------|
| temporo-parietal cortex)                                                                                |                    |               |  |  |                    |               |
| tVNS at left auricle vs 2 mA Anode tDCS at F3, cathode at F4                                            |                    |               |  |  | -0.13 (-1.60,1.34) | ⊕○○○ very low |
| tVNS at left auricle vs 2 mA 10Hz tACS at F3Fp1 to T3P3 (TPJ)                                           |                    |               |  |  | -0.42 (-2.24,1.39) | ⊕○○○ very low |
| tVNS at left auricle vs Sham                                                                            | -0.23 (-1.22,0.75) | ⊕○○○ very low |  |  | -0.23 (-1.50,1.04) | ⊕⊕○○ low      |
| tVNS at left auricle vs iTBS at Iz (vermal part of cerebellum)                                          |                    |               |  |  | -0.29 (-1.68,1.11) | ⊕○○○ very low |
| tVNS at left auricle vs 2 mA Cathode tDCS at F3Fp1, anode at T3P3 (left TPJ)                            |                    |               |  |  | -0.59 (-2.42,1.25) | ⊕○○○ very low |
| tVNS at left auricle vs 1 Hz rTMS at right PFC (F4)                                                     |                    |               |  |  | -0.57 (-2.23,1.09) | ⊕○○○ very low |
| tVNS at left auricle vs Theta-range rTMS at Iz (vermal part of cerebellum)                              |                    |               |  |  | -0.58 (-2.21,1.05) | ⊕○○○ very low |
| 1 Hz deep rTMS at PT3 (left temporo-parietal cortex) vs 1 Hz rTMS at PT3 (left temporo-parietal cortex) |                    |               |  |  | -0.00 (-1.55,1.55) | ⊕○○○ very low |
| 1 Hz deep rTMS at PT3 (left temporo-parietal cortex) vs 2                                               |                    |               |  |  | -0.09 (-1.52,1.35) | ⊕○○○ very low |

|                                                                                                              |                    |               |  |  |                    |               |
|--------------------------------------------------------------------------------------------------------------|--------------------|---------------|--|--|--------------------|---------------|
| mA Anode tDCS at F3, cathode at F4                                                                           |                    |               |  |  |                    |               |
| 1 Hz deep rTMS at PT3 (left temporo-parietal cortex) vs 2 mA 10Hz tACS at F3Fp1 to T3P3 (TPJ)                |                    |               |  |  | -0.38 (-2.16,1.41) | ⊕○○○ very low |
| 1 Hz deep rTMS at PT3 (left temporo-parietal cortex) vs Sham                                                 | -0.19 (-1.11,0.74) | ⊕○○○ very low |  |  | -0.19 (-1.41,1.04) | ⊕⊕○○ low      |
| 1 Hz deep rTMS at PT3 (left temporo-parietal cortex) vs iTBS at lz (vermal part of cerebellum)               |                    |               |  |  | -0.24 (-1.59,1.11) | ⊕○○○ very low |
| 1 Hz deep rTMS at PT3 (left temporo-parietal cortex) vs 2 mA Cathode tDCS at F3Fp1, anode at T3P3 (left TPJ) |                    |               |  |  | -0.54 (-2.35,1.26) | ⊕○○○ very low |
| 1 Hz deep rTMS at PT3 (left temporo-parietal cortex) vs 1 Hz rTMS at right PFC (F4)                          |                    |               |  |  | -0.53 (-2.15,1.10) | ⊕○○○ very low |
| 1 Hz deep rTMS at PT3 (left temporo-parietal cortex) vs Theta-range rTMS at lz (vermal part of cerebellum)   |                    |               |  |  | -0.53 (-2.13,1.06) | ⊕○○○ very low |



|                                                                                                         |                    |          |               |               |                    |               |
|---------------------------------------------------------------------------------------------------------|--------------------|----------|---------------|---------------|--------------------|---------------|
| 1 Hz rTMS at PT3 (left temporo-parietal cortex) vs 2 mA Anode tDCS at F3, cathode at F4                 |                    |          |               |               | -0.09 (-1.29,1.12) | ⊕○○○ very low |
| 1 Hz rTMS at PT3 (left temporo-parietal cortex) vs 2 mA 10Hz tACS at F3Fp1 to T3P3 (TPJ)                |                    |          |               |               | -0.38 (-1.98,1.23) | ⊕○○○ very low |
| 1 Hz rTMS at PT3 (left temporo-parietal cortex) vs Sham                                                 | -0.18 (-0.94,0.57) | ⊕⊕○○ low | 0.12 (318.26) | ⊕○○○ very low | -0.18 (-1.14,0.77) | ⊕⊕⊕⊕ high     |
| 1 Hz rTMS at PT3 (left temporo-parietal cortex) vs iTBS at Iz (vermal part of cerebellum)               |                    |          |               |               | -0.24 (-1.35,0.87) | ⊕○○○ very low |
| 1 Hz rTMS at PT3 (left temporo-parietal cortex) vs 2 mA Cathode tDCS at F3Fp1, anode at T3P3 (left TPJ) |                    |          |               |               | -0.54 (-2.17,1.09) | ⊕○○○ very low |
| 1 Hz rTMS at PT3 (left temporo-parietal cortex) vs 1 Hz rTMS at right PFC (F4)                          |                    |          |               |               | -0.53 (-1.96,0.91) | ⊕○○○ very low |
| 1 Hz rTMS at PT3 (left temporo-parietal cortex) vs Theta-range rTMS at Iz                               |                    |          |               |               | -0.53 (-1.92,0.86) | ⊕○○○ very low |

|                                                                                              |                    |               |  |  |                    |               |
|----------------------------------------------------------------------------------------------|--------------------|---------------|--|--|--------------------|---------------|
| (vermal part of cerebellum)                                                                  |                    |               |  |  |                    |               |
| 2 mA Anode tDCS at F3, cathode at F4 vs 2 mA 10Hz tACS at F3Fp1 to T3P3 (TPJ)                |                    |               |  |  | -0.29 (-1.78,1.20) | ⊕○○○ very low |
| 2 mA Anode tDCS at F3, cathode at F4 vs Sham                                                 | -0.09 (-0.54,0.37) | ⊕⊕○○ low      |  |  | -0.10 (-0.84,0.64) | ⊕⊕○○ low      |
| 2 mA Anode tDCS at F3, cathode at F4 vs iTBS at Iz (vermal part of cerebellum)               |                    |               |  |  | -0.15 (-1.09,0.78) | ⊕⊕○○ low      |
| 2 mA Anode tDCS at F3, cathode at F4 vs 2 mA Cathode tDCS at F3Fp1, anode at T3P3 (left TPJ) |                    |               |  |  | -0.45 (-1.97,1.06) | ⊕○○○ very low |
| 2 mA Anode tDCS at F3, cathode at F4 vs 1 Hz rTMS at right PFC (F4)                          |                    |               |  |  | -0.44 (-1.74,0.86) | ⊕○○○ very low |
| 2 mA Anode tDCS at F3, cathode at F4 vs Theta-range rTMS at Iz (vermal part of cerebellum)   |                    |               |  |  | -0.45 (-1.70,0.81) | ⊕○○○ very low |
| 2 mA 10Hz tACS at F3Fp1 to T3P3 (TPJ) vs Sham                                                | 0.19 (-0.82,1.21)  | ⊕○○○ very low |  |  | 0.19 (-1.10,1.49)  | ⊕⊕○○ low      |
| 2 mA 10Hz tACS at F3Fp1 to T3P3 (TPJ)                                                        |                    |               |  |  | 0.14 (-1.28,1.55)  | ⊕○○○ very low |

|                                                                                                |                    |               |  |  |                    |               |
|------------------------------------------------------------------------------------------------|--------------------|---------------|--|--|--------------------|---------------|
| vs iTBS at Iz (vermal part of cerebellum)                                                      |                    |               |  |  |                    |               |
| 2 mA 10Hz tACS at F3Fp1 to T3P3 (TPJ) vs 2 mA Cathode tDCS at F3Fp1, anode at T3P3 (left TPJ)  | -0.16 (-1.18,0.85) | ⊕○○○ very low |  |  | -0.16 (-1.46,1.13) | ⊕⊕○○ low      |
| 2 mA 10Hz tACS at F3Fp1 to T3P3 (TPJ) vs 1 Hz rTMS at right PFC (F4)                           |                    |               |  |  | -0.15 (-1.83,1.53) | ⊕○○○ very low |
| 2 mA 10Hz tACS at F3Fp1 to T3P3 (TPJ) vs Theta-range rTMS at Iz (vermal part of cerebellum)    |                    |               |  |  | -0.16 (-1.80,1.49) | ⊕○○○ very low |
| Sham vs iTBS at Iz (vermal part of cerebellum)                                                 | -0.05 (-0.54,0.44) | ⊕⊕○○ low      |  |  | -0.05 (-0.63,0.52) | ⊕⊕⊕○ medium   |
| Sham vs 2 mA Cathode tDCS at F3Fp1, anode at T3P3 (left TPJ)                                   | -0.36 (-1.41,0.70) | ⊕○○○ very low |  |  | -0.36 (-1.68,0.97) | ⊕⊕○○ low      |
| Sham vs 1 Hz rTMS at right PFC (F4)                                                            | -0.34 (-1.05,0.37) | ⊕⊕○○ low      |  |  | -0.34 (-1.41,0.73) | ⊕⊕○○ low      |
| Sham vs Theta-range rTMS at Iz (vermal part of cerebellum)                                     | -0.35 (-0.97,0.28) | ⊕⊕○○ low      |  |  | -0.35 (-1.37,0.67) | ⊕⊕○○ low      |
| iTBS at Iz (vermal part of cerebellum) vs 2 mA Cathode tDCS at F3Fp1, anode at T3P3 (left TPJ) |                    |               |  |  | -0.30 (-1.74,1.14) | ⊕○○○ very low |

|                                                                                                            |  |  |  |  |                    |               |
|------------------------------------------------------------------------------------------------------------|--|--|--|--|--------------------|---------------|
| iTBS at Iz (vermal part of cerebellum) vs 1 Hz rTMS at right PFC (F4)                                      |  |  |  |  | -0.29 (-1.50,0.93) | ⊕○○○ very low |
| iTBS at Iz (vermal part of cerebellum) vs Theta-range rTMS at Iz (vermal part of cerebellum)               |  |  |  |  | -0.29 (-1.46,0.87) | ⊕○○○ very low |
| 2 mA Cathode tDCS at F3Fp1, anode at T3P3 (left TPJ) vs 1 Hz rTMS at right PFC (F4)                        |  |  |  |  | 0.01 (-1.69,1.72)  | ⊕○○○ very low |
| 2 mA Cathode tDCS at F3Fp1, anode at T3P3 (left TPJ) vs Theta-range rTMS at Iz (vermal part of cerebellum) |  |  |  |  | 0.01 (-1.66,1.68)  | ⊕○○○ very low |
| 1 Hz rTMS at right PFC (F4) vs Theta-range rTMS at Iz (vermal part of cerebellum)                          |  |  |  |  | -0.01 (-1.48,1.47) | ⊕○○○ very low |

We followed Cochrane Handbook for GRADE ratings in BMJ<sup>43</sup> and one important network meta-analysis in Lancet<sup>44</sup> for quality assessment

**eTable 9B: Quality of evidence for primary outcome: drop-out rate**

| Comparisons                                                                                     | Direct evidence                       |                                     | Indirect evidence              |                                       | Network meta-analysis                 |                             |
|-------------------------------------------------------------------------------------------------|---------------------------------------|-------------------------------------|--------------------------------|---------------------------------------|---------------------------------------|-----------------------------|
|                                                                                                 | Standardized mean difference (95% CI) | The final rating of direct evidence | Co-efficiency (Standard error) | The final rating of indirect evidence | Standardized mean difference (95% CI) | Overall quality of evidence |
| hf (10Hz) rTMS at left PFC (F3) and right PFC (F4) vs iTBS at left DLPFC (F3)                   |                                       |                                     |                                |                                       | 0.68 (0.06,8.30)                      | ⊕○○○ very low               |
| hf (10Hz) rTMS at left PFC (F3) and right PFC (F4) vs hf (10Hz) rTMS at left DLPFC (F3)         |                                       |                                     |                                |                                       | 0.49 (0.06,4.16)                      | ⊕○○○ very low               |
| hf (10Hz) rTMS at left PFC (F3) and right PFC (F4) vs extreme hf (20Hz) rTMS at left DLPFC (F3) |                                       |                                     |                                |                                       | 0.36 (0.04,3.08)                      | ⊕○○○ very low               |
| hf (10Hz) rTMS at left PFC (F3) and right PFC (F4) vs 1 Hz rTMS at right PFC (F4)               |                                       |                                     |                                |                                       | 0.36 (0.03,4.63)                      | ⊕○○○ very low               |
| hf (10Hz) rTMS at left PFC (F3) and right PFC (F4) vs 2 mA 10Hz tACS at F3Fp1 to T3P3 (TPJ)     |                                       |                                     |                                |                                       | 0.38 (0.01,14.15)                     | ⊕○○○ very low               |

|                                                                                                                               |                  |               |  |  |                   |               |
|-------------------------------------------------------------------------------------------------------------------------------|------------------|---------------|--|--|-------------------|---------------|
| hf (10Hz) rTMS at left PFC (F3) and right PFC (F4) vs High definition 2 mA Anode tDCS at F3, cathode at AF3, F7, FC5, and FC1 |                  |               |  |  | 0.33 (0.01,12.50) | ⊕○○○ very low |
| hf (10Hz) rTMS at left PFC (F3) and right PFC (F4) vs 1 Hz deep rTMS at PT3 (left temporo-parietal cortex)                    |                  |               |  |  | 0.33 (0.02,5.45)  | ⊕○○○ very low |
| hf (10Hz) rTMS at left PFC (F3) and right PFC (F4) vs 2 mA Anode tDCS at F3, cathode at Fp2                                   |                  |               |  |  | 0.33 (0.02,5.33)  | ⊕○○○ very low |
| hf (10Hz) rTMS at left PFC (F3) and right PFC (F4) vs 1 Hz rTMS at PT3 (left temporo-parietal cortex)                         |                  |               |  |  | 0.33 (0.01,12.26) | ⊕○○○ very low |
| hf (10Hz) rTMS at left PFC (F3) and right PFC (F4) vs 2 mA Cathode tDCS at F3Fp1, anode at T3P3 (left TPJ)                    |                  |               |  |  | 0.33 (0.01,12.50) | ⊕○○○ very low |
| hf (10Hz) rTMS at left PFC (F3) and right PFC (F4) vs Sham                                                                    | 0.33 (0.04,2.69) | ⊕○○○ very low |  |  | 0.33 (0.04,2.69)  | ⊕⊕⊕○ medium   |

|                                                                                                                                  |  |  |  |  |                   |               |
|----------------------------------------------------------------------------------------------------------------------------------|--|--|--|--|-------------------|---------------|
| hf (10Hz) rTMS at left PFC (F3) and right PFC (F4) vs tVNS at left auricle                                                       |  |  |  |  | 0.33 (0.02,6.87)  | ⊕○○○ very low |
| hf (10Hz) rTMS at left PFC (F3) and right PFC (F4) vs Theta-range rTMS at Iz (vermal part of cerebellum)                         |  |  |  |  | 0.25 (0.02,3.51)  | ⊕○○○ very low |
| hf (10Hz) rTMS at left PFC (F3) and right PFC (F4) vs 6 Hz priming rTMS at PT3 (left temporo-parietal cortex) + 1 Hz rTMS at PT3 |  |  |  |  | 0.22 (0.00,13.04) | ⊕○○○ very low |
| hf (10Hz) rTMS at left PFC (F3) and right PFC (F4) vs iTBS at Iz (vermal part of cerebellum)                                     |  |  |  |  | 0.26 (0.03,2.49)  | ⊕⊕○○ low      |
| hf (10Hz) rTMS at left PFC (F3) and right PFC (F4) vs 2 mA Anode tDCS at F3, cathode at F4                                       |  |  |  |  | 0.20 (0.02,2.17)  | ⊕⊕○○ low      |
| hf (10Hz) rTMS at left PFC (F3) and right PFC (F4) vs 2 mA Anode tDCS at F3Fp1, cathode at T3P3 (left TPJ)                       |  |  |  |  | 0.11 (0.00,5.46)  | ⊕○○○ very low |

|                                                                                                                               |                   |               |              |             |                   |               |
|-------------------------------------------------------------------------------------------------------------------------------|-------------------|---------------|--------------|-------------|-------------------|---------------|
| hf (10Hz) rTMS at left PFC (F3) and right PFC (F4) vs High definition 2 mA Anode tRNS at AF3, cathode at AF4, F2, F6, and FC4 |                   |               |              |             | 0.11 (0.00,5.07)  | ⊕○○○ very low |
| hf (10Hz) rTMS at left PFC (F3) and right PFC (F4) vs 2 mA Anode tDCS at F3, cathode at TP3 (left TPJ)                        |                   |               |              |             | 0.06 (0.00,1.26)  | ⊕⊕⊕○ medium   |
| iTBS at left DLPFC (F3) vs hf (10Hz) rTMS at left DLPFC (F3)                                                                  | 1.04 (0.10,10.45) | ⊕○○○ very low | -0.58 (0.94) | ⊕⊕⊕○ medium | 0.71 (0.17,2.99)  | ⊕⊕⊕⊕ high     |
| iTBS at left DLPFC (F3) vs extreme hf (20Hz) rTMS at left DLPFC (F3)                                                          | 0.44 (0.06,3.16)  | ⊕○○○ very low | -0.60 (0.91) | ⊕⊕⊕○ medium | 0.53 (0.13,2.19)  | ⊕⊕⊕⊕ high     |
| iTBS at left DLPFC (F3) vs 1 Hz rTMS at right PFC (F4)                                                                        |                   |               |              |             | 0.53 (0.07,3.93)  | ⊕○○○ very low |
| iTBS at left DLPFC (F3) vs 2 mA 10Hz tACS at F3Fp1 to T3P3 (TPJ)                                                              |                   |               |              |             | 0.56 (0.02,14.44) | ⊕○○○ very low |
| iTBS at left DLPFC (F3) vs High definition 2 mA Anode tDCS at F3,                                                             |                   |               |              |             | 0.49 (0.02,12.77) | ⊕○○○ very low |



|                                                                                 |                  |          |             |          |                   |               |
|---------------------------------------------------------------------------------|------------------|----------|-------------|----------|-------------------|---------------|
| cathode at AF3, F7, FC5, and FC1                                                |                  |          |             |          |                   |               |
| iTBS at left DLPFC (F3) vs 1 Hz deep rTMS at PT3 (left temporo-parietal cortex) |                  |          |             |          | 0.49 (0.05,4.91)  | ⊕○○○ very low |
| iTBS at left DLPFC (F3) vs 2 mA Anode tDCS at F3, cathode at Fp2                |                  |          |             |          | 0.49 (0.05,4.78)  | ⊕○○○ very low |
| iTBS at left DLPFC (F3) vs 1 Hz rTMS at PT3 (left temporo-parietal cortex)      |                  |          |             |          | 0.49 (0.02,12.50) | ⊕○○○ very low |
| iTBS at left DLPFC (F3) vs 2 mA Cathode tDCS at F3Fp1, anode at T3P3 (left TPJ) |                  |          |             |          | 0.49 (0.02,12.77) | ⊕○○○ very low |
| iTBS at left DLPFC (F3) vs Sham                                                 | 0.42 (0.10,1.73) | ⊕⊕○○ low | 0.26 (1.35) | ⊕⊕○○ low | 0.49 (0.12,1.92)  | ⊕⊕⊕⊕ high     |
| iTBS at left DLPFC (F3) vs tVNS at left auricle                                 |                  |          |             |          | 0.49 (0.04,6.47)  | ⊕○○○ very low |
| iTBS at left DLPFC (F3) vs Theta-range rTMS at lz (vermal part of cerebellum)   |                  |          |             |          | 0.37 (0.04,3.05)  | ⊕○○○ very low |
| iTBS at left DLPFC (F3) vs 6 Hz priming rTMS at PT3 (left temporo-parietal      |                  |          |             |          | 0.33 (0.01,13.91) | ⊕○○○ very low |

|                                                                                                    |                  |          |              |             |                  |               |
|----------------------------------------------------------------------------------------------------|------------------|----------|--------------|-------------|------------------|---------------|
| cortex) + 1 Hz rTMS at PT3                                                                         |                  |          |              |             |                  |               |
| iTBS at left DLPFC (F3) vs iTBS at Iz (vermal part of cerebellum)                                  |                  |          |              |             | 0.38 (0.08,1.93) | ⊕⊕⊕○ medium   |
| iTBS at left DLPFC (F3) vs 2 mA Anode tDCS at F3, cathode at F4                                    |                  |          |              |             | 0.29 (0.05,1.75) | ⊕⊕⊕○ medium   |
| iTBS at left DLPFC (F3) vs 2 mA Anode tDCS at F3Fp1, cathode at T3P3 (left TPJ)                    |                  |          |              |             | 0.16 (0.00,5.73) | ⊕○○○ very low |
| iTBS at left DLPFC (F3) vs High definition 2 mA Anode tRNS at AF3, cathode at AF4, F2, F6, and FC4 |                  |          |              |             | 0.15 (0.00,5.31) | ⊕○○○ very low |
| iTBS at left DLPFC (F3) vs 2 mA Anode tDCS at F3, cathode at TP3 (left TPJ)                        |                  |          |              |             | 0.09 (0.01,1.18) | ⊕⊕⊕○ medium   |
| hf (10Hz) rTMS at left DLPFC (F3) vs extreme hf (20Hz) rTMS at left DLPFC (F3)                     | 0.46 (0.19,1.12) | ⊕⊕○○ low | -0.17 (0.44) | ⊕⊕⊕○ medium | 0.75 (0.40,1.39) | ⊕⊕⊕⊕ high     |
| hf (10Hz) rTMS at left DLPFC (F3) vs 1 Hz rTMS at right PFC (F4)                                   |                  |          |              |             | 0.74 (0.16,3.51) | ⊕○○○ very low |

|                                                                                                              |                  |          |              |             |                   |               |
|--------------------------------------------------------------------------------------------------------------|------------------|----------|--------------|-------------|-------------------|---------------|
| hf (10Hz) rTMS at left DLPFC (F3) vs 2 mA 10Hz tACS at F3Fp1 to T3P3 (TPJ)                                   |                  |          |              |             | 0.78 (0.04,15.65) | ⊕○○○ very low |
| hf (10Hz) rTMS at left DLPFC (F3) vs High definition 2 mA Anode tDCS at F3, cathode at AF3, F7, FC5, and FC1 |                  |          |              |             | 0.69 (0.03,13.85) | ⊕○○○ very low |
| hf (10Hz) rTMS at left DLPFC (F3) vs 1 Hz deep rTMS at PT3 (left temporo-parietal cortex)                    |                  |          |              |             | 0.69 (0.10,4.71)  | ⊕○○○ very low |
| hf (10Hz) rTMS at left DLPFC (F3) vs 2 mA Anode tDCS at F3, cathode at Fp2                                   |                  |          |              |             | 0.69 (0.10,4.55)  | ⊕○○○ very low |
| hf (10Hz) rTMS at left DLPFC (F3) vs 1 Hz rTMS at PT3 (left temporo-parietal cortex)                         |                  |          |              |             | 0.69 (0.03,13.54) | ⊕○○○ very low |
| hf (10Hz) rTMS at left DLPFC (F3) vs 2 mA Cathode tDCS at F3Fp1, anode at T3P3 (left TPJ)                    |                  |          |              |             | 0.69 (0.03,13.85) | ⊕○○○ very low |
| hf (10Hz) rTMS at left DLPFC (F3) vs Sham                                                                    | 0.78 (0.46,1.32) | ⊕⊕○○ low | -1.69 (0.93) | ⊕⊕⊕○ medium | 0.69 (0.41,1.14)  | ⊕⊕⊕⊕ high     |

|                                                                                                                 |  |  |  |  |                   |               |
|-----------------------------------------------------------------------------------------------------------------|--|--|--|--|-------------------|---------------|
| hf (10Hz) rTMS at left DLPFC (F3) vs tvNS at left auricle                                                       |  |  |  |  | 0.69 (0.07,6.50)  | ⊕○○○ very low |
| hf (10Hz) rTMS at left DLPFC (F3) vs Theta-range rTMS at Iz (vermal part of cerebellum)                         |  |  |  |  | 0.51 (0.09,2.81)  | ⊕⊕○○ low      |
| hf (10Hz) rTMS at left DLPFC (F3) vs 6 Hz priming rTMS at PT3 (left temporo-parietal cortex) + 1 Hz rTMS at PT3 |  |  |  |  | 0.46 (0.01,15.65) | ⊕○○○ very low |
| hf (10Hz) rTMS at left DLPFC (F3) vs iTBS at Iz (vermal part of cerebellum)                                     |  |  |  |  | 0.53 (0.20,1.46)  | ⊕⊕⊕○ medium   |
| hf (10Hz) rTMS at left DLPFC (F3) vs 2 mA Anode tDCS at F3, cathode at F4                                       |  |  |  |  | 0.41 (0.12,1.45)  | ⊕⊕⊕⊕ high     |
| hf (10Hz) rTMS at left DLPFC (F3) vs 2 mA Anode tDCS at F3Fp1, cathode at T3P3 (left TPJ)                       |  |  |  |  | 0.23 (0.01,6.37)  | ⊕○○○ very low |
| hf (10Hz) rTMS at left DLPFC (F3) vs High definition 2 mA Anode tRNS at AF3, cathode at AF4, F2, F6, and FC4    |  |  |  |  | 0.22 (0.01,5.89)  | ⊕○○○ very low |

|                                                                                                                      |  |  |  |  |                   |               |
|----------------------------------------------------------------------------------------------------------------------|--|--|--|--|-------------------|---------------|
| hf (10Hz) rTMS at left DLPFC (F3) vs 2 mA Anode tDCS at F3, cathode at TP3 (left TPJ)                                |  |  |  |  | 0.13 (0.01,1.19)  | ⊕⊕⊕⊕ high     |
| extreme hf (20Hz) rTMS at left DLPFC (F3) vs 1 Hz rTMS at right PFC (F4)                                             |  |  |  |  | 0.99 (0.21,4.64)  | ⊕○○○ very low |
| extreme hf (20Hz) rTMS at left DLPFC (F3) vs 2 mA 10Hz tACS at F3Fp1 to T3P3 (TPJ)                                   |  |  |  |  | 1.05 (0.05,20.82) | ⊕○○○ very low |
| extreme hf (20Hz) rTMS at left DLPFC (F3) vs High definition 2 mA Anode tDCS at F3, cathode at AF3, F7, FC5, and FC1 |  |  |  |  | 0.92 (0.05,18.43) | ⊕○○○ very low |
| extreme hf (20Hz) rTMS at left DLPFC (F3) vs 1 Hz deep rTMS at PT3 (left temporo-parietal cortex)                    |  |  |  |  | 0.92 (0.13,6.24)  | ⊕○○○ very low |
| extreme hf (20Hz) rTMS at left DLPFC (F3) vs 2 mA Anode tDCS at F3, cathode at Fp2                                   |  |  |  |  | 0.92 (0.14,6.04)  | ⊕○○○ very low |

|                                                                                                                         |                  |          |             |          |                   |               |
|-------------------------------------------------------------------------------------------------------------------------|------------------|----------|-------------|----------|-------------------|---------------|
| extreme hf (20Hz) rTMS at left DLPFC (F3) vs 1 Hz rTMS at PT3 (left temporo-parietal cortex)                            |                  |          |             |          | 0.92 (0.05,18.01) | ⊕○○○ very low |
| extreme hf (20Hz) rTMS at left DLPFC (F3) vs 2 mA Cathode tDCS at F3Fp1, anode at T3P3 (left TPJ)                       |                  |          |             |          | 0.92 (0.05,18.43) | ⊕○○○ very low |
| extreme hf (20Hz) rTMS at left DLPFC (F3) vs Sham                                                                       | 0.87 (0.48,1.58) | ⊕⊕○○ low | 0.77 (1.00) | ⊕⊕○○ low | 0.92 (0.57,1.47)  | ⊕⊕⊕⊕ high     |
| extreme hf (20Hz) rTMS at left DLPFC (F3) vs tVNS at left auricle                                                       |                  |          |             |          | 0.92 (0.10,8.63)  | ⊕○○○ very low |
| extreme hf (20Hz) rTMS at left DLPFC (F3) vs Theta-range rTMS at Iz (vermal part of cerebellum)                         |                  |          |             |          | 0.69 (0.13,3.72)  | ⊕○○○ very low |
| extreme hf (20Hz) rTMS at left DLPFC (F3) vs 6 Hz priming rTMS at PT3 (left temporo-parietal cortex) + 1 Hz rTMS at PT3 |                  |          |             |          | 0.61 (0.02,20.83) | ⊕○○○ very low |
| extreme hf (20Hz) rTMS at left DLPFC (F3) vs iTBS at Iz                                                                 |                  |          |             |          | 0.72 (0.27,1.92)  | ⊕⊕⊕○ medium   |

|                                                                                                                      |  |  |  |  |                   |               |
|----------------------------------------------------------------------------------------------------------------------|--|--|--|--|-------------------|---------------|
| (vermal part of cerebellum)                                                                                          |  |  |  |  |                   |               |
| extreme hf (20Hz) rTMS at left DLPFC (F3) vs 2 mA Anode tDCS at F3, cathode at F4                                    |  |  |  |  | 0.55 (0.16,1.91)  | ⊕⊕⊕○ medium   |
| extreme hf (20Hz) rTMS at left DLPFC (F3) vs 2 mA Anode tDCS at F3Fp1, cathode at T3P3 (left TPJ)                    |  |  |  |  | 0.31 (0.01,8.47)  | ⊕○○○ very low |
| extreme hf (20Hz) rTMS at left DLPFC (F3) vs High definition 2 mA Anode tRNS at AF3, cathode at AF4, F2, F6, and FC4 |  |  |  |  | 0.29 (0.01,7.84)  | ⊕○○○ very low |
| extreme hf (20Hz) rTMS at left DLPFC (F3) vs 2 mA Anode tDCS at F3, cathode at TP3 (left TPJ)                        |  |  |  |  | 0.17 (0.02,1.57)  | ⊕⊕⊕○ medium   |
| 1 Hz rTMS at right PFC (F4) vs 2 mA 10Hz tACS at F3Fp1 to T3P3 (TPJ)                                                 |  |  |  |  | 1.05 (0.04,28.49) | ⊕○○○ very low |
| 1 Hz rTMS at right PFC (F4) vs High definition 2 mA Anode tDCS at F3,                                                |  |  |  |  | 0.92 (0.03,25.19) | ⊕○○○ very low |

|                                                                                     |                  |               |  |  |                   |               |
|-------------------------------------------------------------------------------------|------------------|---------------|--|--|-------------------|---------------|
| cathode at AF3, F7, FC5, and FC1                                                    |                  |               |  |  |                   |               |
| 1 Hz rTMS at right PFC (F4) vs 1 Hz deep rTMS at PT3 (left temporo-parietal cortex) |                  |               |  |  | 0.92 (0.09,9.86)  | ⊕○○○ very low |
| 1 Hz rTMS at right PFC (F4) vs 2 mA Anode tDCS at F3, cathode at Fp2                |                  |               |  |  | 0.92 (0.09,9.59)  | ⊕○○○ very low |
| 1 Hz rTMS at right PFC (F4) vs 1 Hz rTMS at PT3 (left temporo-parietal cortex)      |                  |               |  |  | 0.92 (0.03,24.67) | ⊕○○○ very low |
| 1 Hz rTMS at right PFC (F4) vs 2 mA Cathode tDCS at F3Fp1, anode at T3P3 (left TPJ) |                  |               |  |  | 0.92 (0.03,25.19) | ⊕○○○ very low |
| 1 Hz rTMS at right PFC (F4) vs Sham                                                 | 0.92 (0.21,4.00) | ⊕○○○ very low |  |  | 0.92 (0.21,4.00)  | ⊕⊕⊕○ medium   |
| 1 Hz rTMS at right PFC (F4) vs tVNS at left auricle                                 |                  |               |  |  | 0.92 (0.07,12.90) | ⊕○○○ very low |
| 1 Hz rTMS at right PFC (F4) vs Theta-range rTMS at Iz (vermal part of cerebellum)   |                  |               |  |  | 0.69 (0.08,6.16)  | ⊕○○○ very low |
| 1 Hz rTMS at right PFC (F4) vs 6 Hz priming rTMS at PT3                             |                  |               |  |  | 0.62 (0.01,27.29) | ⊕○○○ very low |



|                                                                                                                  |  |  |  |  |                   |               |
|------------------------------------------------------------------------------------------------------------------|--|--|--|--|-------------------|---------------|
| (left temporo-parietal cortex) + 1 Hz rTMS at PT3                                                                |  |  |  |  |                   |               |
| 1 Hz rTMS at right PFC (F4) vs iTBS at Iz (vermal part of cerebellum)                                            |  |  |  |  | 0.72 (0.13,3.96)  | ⊕○○○ very low |
| 1 Hz rTMS at right PFC (F4) vs 2 mA Anode tDCS at F3, cathode at F4                                              |  |  |  |  | 0.55 (0.09,3.58)  | ⊕○○○ very low |
| 1 Hz rTMS at right PFC (F4) vs 2 mA Anode tDCS at F3Fp1, cathode at T3P3 (left TPJ)                              |  |  |  |  | 0.31 (0.01,11.27) | ⊕○○○ very low |
| 1 Hz rTMS at right PFC (F4) vs High definition 2 mA Anode tRNS at AF3, cathode at AF4, F2, F6, and FC4           |  |  |  |  | 0.29 (0.01,10.45) | ⊕○○○ very low |
| 1 Hz rTMS at right PFC (F4) vs 2 mA Anode tDCS at F3, cathode at TP3 (left TPJ)                                  |  |  |  |  | 0.17 (0.01,2.36)  | ⊕⊕○○ low      |
| 2 mA 10Hz tACS at F3Fp1 to T3P3 (TPJ) vs High definition 2 mA Anode tDCS at F3, cathode at AF3, F7, FC5, and FC1 |  |  |  |  | 0.88 (0.01,57.33) | ⊕○○○ very low |

|                                                                                               |                   |               |  |  |                   |               |
|-----------------------------------------------------------------------------------------------|-------------------|---------------|--|--|-------------------|---------------|
| 2 mA 10Hz tACS at F3Fp1 to T3P3 (TPJ) vs 1 Hz deep rTMS at PT3 (left temporo-parietal cortex) |                   |               |  |  | 0.88 (0.03,28.64) | ⊕○○○ very low |
| 2 mA 10Hz tACS at F3Fp1 to T3P3 (TPJ) vs 2 mA Anode tDCS at F3, cathode at Fp2                |                   |               |  |  | 0.88 (0.03,28.12) | ⊕○○○ very low |
| 2 mA 10Hz tACS at F3Fp1 to T3P3 (TPJ) vs 1 Hz rTMS at PT3 (left temporo-parietal cortex)      |                   |               |  |  | 0.88 (0.01,56.40) | ⊕○○○ very low |
| 2 mA 10Hz tACS at F3Fp1 to T3P3 (TPJ) vs 2 mA Cathode tDCS at F3Fp1, anode at T3P3 (left TPJ) | 0.87 (0.05,16.67) | ⊕○○○ very low |  |  | 0.87 (0.05,16.74) | ⊕⊕⊕○ medium   |
| 2 mA 10Hz tACS at F3Fp1 to T3P3 (TPJ) vs Sham                                                 | 0.88 (0.05,16.74) | ⊕○○○ very low |  |  | 0.88 (0.05,16.74) | ⊕⊕⊕○ medium   |
| 2 mA 10Hz tACS at F3Fp1 to T3P3 (TPJ) vs tVNS at left auricle                                 |                   |               |  |  | 0.88 (0.02,34.56) | ⊕○○○ very low |
| 2 mA 10Hz tACS at F3Fp1 to T3P3 (TPJ) vs Theta-range rTMS at Iz (vermal part of cerebellum)   |                   |               |  |  | 0.66 (0.02,19.03) | ⊕○○○ very low |
| 2 mA 10Hz tACS at F3Fp1 to T3P3 (TPJ) vs 6 Hz priming rTMS                                    |                   |               |  |  | 0.58 (0.01,56.66) | ⊕○○○ very low |

|                                                                                                                  |  |  |  |  |                   |               |
|------------------------------------------------------------------------------------------------------------------|--|--|--|--|-------------------|---------------|
| at PT3 (left temporo-parietal cortex) + 1 Hz rTMS at PT3                                                         |  |  |  |  |                   |               |
| 2 mA 10Hz tACS at F3Fp1 to T3P3 (TPJ) vs iTBS at Iz (vermal part of cerebellum)                                  |  |  |  |  | 0.68 (0.03,14.79) | ⊕○○○ very low |
| 2 mA 10Hz tACS at F3Fp1 to T3P3 (TPJ) vs 2 mA Anode tDCS at F3, cathode at F4                                    |  |  |  |  | 0.52 (0.02,12.48) | ⊕○○○ very low |
| 2 mA 10Hz tACS at F3Fp1 to T3P3 (TPJ) vs 2 mA Anode tDCS at F3Fp1, cathode at T3P3 (left TPJ)                    |  |  |  |  | 0.29 (0.00,24.20) | ⊕○○○ very low |
| 2 mA 10Hz tACS at F3Fp1 to T3P3 (TPJ) vs High definition 2 mA Anode tRNS at AF3, cathode at AF4, F2, F6, and FC4 |  |  |  |  | 0.28 (0.00,22.53) | ⊕○○○ very low |
| 2 mA 10Hz tACS at F3Fp1 to T3P3 (TPJ) vs 2 mA Anode tDCS at F3, cathode at TP3 (left TPJ)                        |  |  |  |  | 0.16 (0.00,6.32)  | ⊕○○○ very low |
| High definition 2 mA Anode tDCS at F3, cathode at AF3, F7, FC5, and FC1 vs 1 Hz deep rTMS at PT3                 |  |  |  |  | 1.00 (0.03,33.06) | ⊕○○○ very low |

|                                                                                                                                 |                   |               |  |  |                   |               |
|---------------------------------------------------------------------------------------------------------------------------------|-------------------|---------------|--|--|-------------------|---------------|
| (left temporo-parietal cortex)                                                                                                  |                   |               |  |  |                   |               |
| High definition 2 mA Anode tDCS at F3, cathode at AF3, F7, FC5, and FC1 vs 2 mA Anode tDCS at F3, cathode at Fp2                |                   |               |  |  | 1.00 (0.03,32.46) | ⊕○○○ very low |
| High definition 2 mA Anode tDCS at F3, cathode at AF3, F7, FC5, and FC1 vs 1 Hz rTMS at PT3 (left temporo-parietal cortex)      |                   |               |  |  | 1.00 (0.02,64.99) | ⊕○○○ very low |
| High definition 2 mA Anode tDCS at F3, cathode at AF3, F7, FC5, and FC1 vs 2 mA Cathode tDCS at F3Fp1, anode at T3P3 (left TPJ) |                   |               |  |  | 1.00 (0.02,66.06) | ⊕○○○ very low |
| High definition 2 mA Anode tDCS at F3, cathode at AF3, F7, FC5, and FC1 vs Sham                                                 | 1.00 (0.05,19.36) | ⊕○○○ very low |  |  | 1.00 (0.05,19.36) | ⊕⊕⊕○ medium   |
| High definition 2 mA Anode tDCS at F3, cathode at AF3, F7, FC5, and FC1 vs tVNS at left auricle                                 |                   |               |  |  | 1.00 (0.03,39.86) | ⊕○○○ very low |
| High definition 2 mA Anode tDCS at F3,                                                                                          |                   |               |  |  | 0.75 (0.03,21.97) | ⊕○○○ very low |

|                                                                                                                                                       |  |  |  |  |                   |               |
|-------------------------------------------------------------------------------------------------------------------------------------------------------|--|--|--|--|-------------------|---------------|
| cathode at AF3, F7, FC5, and FC1 vs Theta-range rTMS at Iz (vermal part of cerebellum)                                                                |  |  |  |  |                   |               |
| High definition 2 mA Anode tDCS at F3, cathode at AF3, F7, FC5, and FC1 vs 6 Hz priming rTMS at PT3 (left temporo-parietal cortex) + 1 Hz rTMS at PT3 |  |  |  |  | 0.67 (0.01,65.24) | ⊕○○○ very low |
| High definition 2 mA Anode tDCS at F3, cathode at AF3, F7, FC5, and FC1 vs iTBS at Iz (vermal part of cerebellum)                                     |  |  |  |  | 0.78 (0.04,17.09) | ⊕○○○ very low |
| High definition 2 mA Anode tDCS at F3, cathode at AF3, F7, FC5, and FC1 vs 2 mA Anode tDCS at F3, cathode at F4                                       |  |  |  |  | 0.60 (0.02,14.42) | ⊕○○○ very low |
| High definition 2 mA Anode tDCS at F3, cathode at AF3, F7, FC5, and FC1 vs 2 mA Anode tDCS at F3Fp1, cathode at T3P3 (left TPJ)                       |  |  |  |  | 0.33 (0.00,27.88) | ⊕○○○ very low |

|                                                                                                                                                    |  |  |  |  |                   |               |
|----------------------------------------------------------------------------------------------------------------------------------------------------|--|--|--|--|-------------------|---------------|
| High definition 2 mA Anode tDCS at F3, cathode at AF3, F7, FC5, and FC1 vs High definition 2 mA Anode tRNS at AF3, cathode at AF4, F2, F6, and FC4 |  |  |  |  | 0.32 (0.00,25.95) | ⊕○○○ very low |
| High definition 2 mA Anode tDCS at F3, cathode at AF3, F7, FC5, and FC1 vs 2 mA Anode tDCS at F3, cathode at TP3 (left TPJ)                        |  |  |  |  | 0.18 (0.00,7.29)  | ⊕○○○ very low |
| 1 Hz deep rTMS at PT3 (left temporo-parietal cortex) vs 2 mA Anode tDCS at F3, cathode at Fp2                                                      |  |  |  |  | 1.00 (0.07,13.53) | ⊕○○○ very low |
| 1 Hz deep rTMS at PT3 (left temporo-parietal cortex) vs 1 Hz rTMS at PT3 (left temporo-parietal cortex)                                            |  |  |  |  | 1.00 (0.03,32.41) | ⊕○○○ very low |
| 1 Hz deep rTMS at PT3 (left temporo-parietal cortex) vs 2 mA Cathode tDCS at F3Fp1, anode at T3P3 (left TPJ)                                       |  |  |  |  | 1.00 (0.03,33.06) | ⊕○○○ very low |

|                                                                                                                                    |                  |               |  |  |                   |               |
|------------------------------------------------------------------------------------------------------------------------------------|------------------|---------------|--|--|-------------------|---------------|
| 1 Hz deep rTMS at PT3 (left temporo-parietal cortex) vs Sham                                                                       | 1.00 (0.16,6.42) | ⊕○○○ very low |  |  | 1.00 (0.16,6.42)  | ⊕⊕⊕○ medium   |
| 1 Hz deep rTMS at PT3 (left temporo-parietal cortex) vs tVNS at left auricle                                                       |                  |               |  |  | 1.00 (0.06,17.71) | ⊕○○○ very low |
| 1 Hz deep rTMS at PT3 (left temporo-parietal cortex) vs Theta-range rTMS at Iz (vermal part of cerebellum)                         |                  |               |  |  | 0.75 (0.06,8.83)  | ⊕○○○ very low |
| 1 Hz deep rTMS at PT3 (left temporo-parietal cortex) vs 6 Hz priming rTMS at PT3 (left temporo-parietal cortex) + 1 Hz rTMS at PT3 |                  |               |  |  | 0.67 (0.01,34.99) | ⊕○○○ very low |
| 1 Hz deep rTMS at PT3 (left temporo-parietal cortex) vs iTBS at Iz (vermal part of cerebellum)                                     |                  |               |  |  | 0.78 (0.10,6.07)  | ⊕○○○ very low |
| 1 Hz deep rTMS at PT3 (left temporo-parietal cortex) vs 2 mA Anode tDCS at F3, cathode at F4                                       |                  |               |  |  | 0.60 (0.07,5.35)  | ⊕○○○ very low |
| 1 Hz deep rTMS at PT3 (left temporo-                                                                                               |                  |               |  |  | 0.33 (0.01,14.57) | ⊕○○○ very low |

|                                                                                                                                 |                  |               |  |  |                   |               |
|---------------------------------------------------------------------------------------------------------------------------------|------------------|---------------|--|--|-------------------|---------------|
| parietal cortex) vs 2 mA Anode tDCS at F3Fp1, cathode at T3P3 (left TPJ)                                                        |                  |               |  |  |                   |               |
| 1 Hz deep rTMS at PT3 (left temporo-parietal cortex) vs High definition 2 mA Anode tRNS at AF3, cathode at AF4, F2, F6, and FC4 |                  |               |  |  | 0.32 (0.01,13.53) | ⊕○○○ very low |
| 1 Hz deep rTMS at PT3 (left temporo-parietal cortex) vs 2 mA Anode tDCS at F3, cathode at TP3 (left TPJ)                        |                  |               |  |  | 0.18 (0.01,3.24)  | ⊕○○○ very low |
| 2 mA Anode tDCS at F3, cathode at Fp2 vs 1 Hz rTMS at PT3 (left temporo-parietal cortex)                                        |                  |               |  |  | 1.00 (0.03,31.82) | ⊕○○○ very low |
| 2 mA Anode tDCS at F3, cathode at Fp2 vs 2 mA Cathode tDCS at F3Fp1, anode at T3P3 (left TPJ)                                   |                  |               |  |  | 1.00 (0.03,32.46) | ⊕○○○ very low |
| 2 mA Anode tDCS at F3, cathode at Fp2 vs Sham                                                                                   | 1.00 (0.16,6.20) | ⊕○○○ very low |  |  | 1.00 (0.16,6.20)  | ⊕⊕⊕○ medium   |
| 2 mA Anode tDCS at F3, cathode at Fp2 vs tVNS at left auricle                                                                   |                  |               |  |  | 1.00 (0.06,17.31) | ⊕○○○ very low |



|                                                                                                                     |  |  |  |  |                   |               |
|---------------------------------------------------------------------------------------------------------------------|--|--|--|--|-------------------|---------------|
| 2 mA Anode tDCS at F3, cathode at Fp2 vs Theta-range rTMS at Iz (vermal part of cerebellum)                         |  |  |  |  | 0.75 (0.07,8.61)  | ⊕○○○ very low |
| 2 mA Anode tDCS at F3, cathode at Fp2 vs 6 Hz priming rTMS at PT3 (left temporo-parietal cortex) + 1 Hz rTMS at PT3 |  |  |  |  | 0.67 (0.01,34.43) | ⊕○○○ very low |
| 2 mA Anode tDCS at F3, cathode at Fp2 vs iTBS at Iz (vermal part of cerebellum)                                     |  |  |  |  | 0.78 (0.10,5.88)  | ⊕○○○ very low |
| 2 mA Anode tDCS at F3, cathode at Fp2 vs 2 mA Anode tDCS at F3, cathode at F4                                       |  |  |  |  | 0.60 (0.07,5.19)  | ⊕○○○ very low |
| 2 mA Anode tDCS at F3, cathode at Fp2 vs 2 mA Anode tDCS at F3Fp1, cathode at T3P3 (left TPJ)                       |  |  |  |  | 0.33 (0.01,14.33) | ⊕○○○ very low |
| 2 mA Anode tDCS at F3, cathode at Fp2 vs High definition 2 mA Anode tRNS at AF3, cathode at AF4, F2, F6, and FC4    |  |  |  |  | 0.32 (0.01,13.30) | ⊕○○○ very low |
| 2 mA Anode tDCS at F3, cathode at Fp2 vs 2 mA Anode tDCS at                                                         |  |  |  |  | 0.18 (0.01,3.16)  | ⊕○○○ very low |

|                                                                                                                               |                   |               |                 |               |                   |               |
|-------------------------------------------------------------------------------------------------------------------------------|-------------------|---------------|-----------------|---------------|-------------------|---------------|
| F3, cathode at TP3 (left TPJ)                                                                                                 |                   |               |                 |               |                   |               |
| 1 Hz rTMS at PT3 (left temporo-parietal cortex) vs 2 mA Cathode tDCS at F3Fp1, anode at T3P3 (left TPJ)                       |                   |               |                 |               | 1.00 (0.02,64.99) | ⊕○○○ very low |
| 1 Hz rTMS at PT3 (left temporo-parietal cortex) vs Sham                                                                       | 1.00 (0.05,18.92) | ⊕○○○ very low | -0.22 (1001.60) | ⊕○○○ very low | 1.00 (0.05,18.91) | ⊕⊕⊕⊕ high     |
| 1 Hz rTMS at PT3 (left temporo-parietal cortex) vs tVNS at left auricle                                                       |                   |               |                 |               | 1.00 (0.03,39.12) | ⊕○○○ very low |
| 1 Hz rTMS at PT3 (left temporo-parietal cortex) vs Theta-range rTMS at Iz (vermal part of cerebellum)                         |                   |               |                 |               | 0.75 (0.03,21.52) | ⊕○○○ very low |
| 1 Hz rTMS at PT3 (left temporo-parietal cortex) vs 6 Hz priming rTMS at PT3 (left temporo-parietal cortex) + 1 Hz rTMS at PT3 | 0.67 (0.10, 4.42) | ⊕○○○ very low | -0.01 (1909.69) | ⊕○○○ very low | 0.67 (0.10,4.43)  | ⊕⊕⊕⊕ high     |
| 1 Hz rTMS at PT3 (left temporo-parietal cortex) vs iTBS at Iz (vermal part of cerebellum)                                     |                   |               |                 |               | 0.78 (0.04,16.72) | ⊕○○○ very low |

|                                                                                                                            |                   |               |  |  |                   |               |
|----------------------------------------------------------------------------------------------------------------------------|-------------------|---------------|--|--|-------------------|---------------|
| 1 Hz rTMS at PT3 (left temporo-parietal cortex) vs 2 mA Anode tDCS at F3, cathode at F4                                    |                   |               |  |  | 0.60 (0.03,14.11) | ⊕○○○ very low |
| 1 Hz rTMS at PT3 (left temporo-parietal cortex) vs 2 mA Anode tDCS at F3Fp1, cathode at T3P3 (left TPJ)                    |                   |               |  |  | 0.33 (0.00,27.45) | ⊕○○○ very low |
| 1 Hz rTMS at PT3 (left temporo-parietal cortex) vs High definition 2 mA Anode tRNS at AF3, cathode at AF4, F2, F6, and FC4 |                   |               |  |  | 0.32 (0.00,25.55) | ⊕○○○ very low |
| 1 Hz rTMS at PT3 (left temporo-parietal cortex) vs 2 mA Anode tDCS at F3, cathode at TP3 (left TPJ)                        |                   |               |  |  | 0.18 (0.00,7.16)  | ⊕○○○ very low |
| 2 mA Cathode tDCS at F3Fp1, anode at T3P3 (left TPJ) vs Sham                                                               | 1.00 (0.05,19.36) | ⊕○○○ very low |  |  | 1.00 (0.05,19.36) | ⊕⊕⊕○ medium   |
| 2 mA Cathode tDCS at F3Fp1, anode at T3P3 (left TPJ) vs tVNS at left auricle                                               |                   |               |  |  | 1.00 (0.03,39.86) | ⊕○○○ very low |

|                                                                                                                                    |  |  |  |  |                   |               |
|------------------------------------------------------------------------------------------------------------------------------------|--|--|--|--|-------------------|---------------|
| 2 mA Cathode tDCS at F3Fp1, anode at T3P3 (left TPJ) vs Theta-range rTMS at Iz (vermal part of cerebellum)                         |  |  |  |  | 0.75 (0.03,21.97) | ⊕○○○ very low |
| 2 mA Cathode tDCS at F3Fp1, anode at T3P3 (left TPJ) vs 6 Hz priming rTMS at PT3 (left temporo-parietal cortex) + 1 Hz rTMS at PT3 |  |  |  |  | 0.67 (0.01,65.24) | ⊕○○○ very low |
| 2 mA Cathode tDCS at F3Fp1, anode at T3P3 (left TPJ) vs iTBS at Iz (vermal part of cerebellum)                                     |  |  |  |  | 0.78 (0.04,17.09) | ⊕○○○ very low |
| 2 mA Cathode tDCS at F3Fp1, anode at T3P3 (left TPJ) vs 2 mA Anode tDCS at F3, cathode at F4                                       |  |  |  |  | 0.60 (0.02,14.42) | ⊕○○○ very low |
| 2 mA Cathode tDCS at F3Fp1, anode at T3P3 (left TPJ) vs 2 mA Anode tDCS at F3Fp1, cathode at T3P3 (left TPJ)                       |  |  |  |  | 0.33 (0.00,27.88) | ⊕○○○ very low |
| 2 mA Cathode tDCS at F3Fp1, anode at T3P3 (left TPJ) vs High definition 2 mA                                                       |  |  |  |  | 0.32 (0.00,25.95) | ⊕○○○ very low |

|                                                                                                          |                  |               |  |  |                   |               |
|----------------------------------------------------------------------------------------------------------|------------------|---------------|--|--|-------------------|---------------|
| Anode tRNS at AF3, cathode at AF4, F2, F6, and FC4                                                       |                  |               |  |  |                   |               |
| 2 mA Cathode tDCS at F3Fp1, anode at T3P3 (left TPJ) vs 2 mA Anode tDCS at F3, cathode at TP3 (left TPJ) |                  |               |  |  | 0.18 (0.00,7.29)  | ⊕○○○ very low |
| Sham vs tVNS at left auricle                                                                             | 1.00 (0.11,8.95) | ⊕○○○ very low |  |  | 1.00 (0.11,8.95)  | ⊕⊕⊕○ medium   |
| Sham vs Theta-range rTMS at lz (vermal part of cerebellum)                                               | 0.75 (0.15,3.79) | ⊕○○○ very low |  |  | 0.75 (0.15,3.79)  | ⊕⊕⊕○ medium   |
| Sham vs 6 Hz priming rTMS at PT3 (left temporo-parietal cortex) + 1 Hz rTMS at PT3                       |                  |               |  |  | 0.67 (0.02,22.01) | ⊕○○○ very low |
| Sham vs iTBS at lz (vermal part of cerebellum)                                                           | 0.78 (0.33,1.86) | ⊕⊕○○ low      |  |  | 0.78 (0.33,1.86)  | ⊕⊕⊕⊕ high     |
| Sham vs 2 mA Anode tDCS at F3, cathode at F4                                                             | 0.60 (0.19,1.90) | ⊕⊕○○ low      |  |  | 0.60 (0.19,1.90)  | ⊕⊕⊕⊕ high     |
| Sham vs 2 mA Anode tDCS at F3Fp1, cathode at T3P3 (left TPJ)                                             | 0.33 (0.01,8.93) | ⊕○○○ very low |  |  | 0.33 (0.01,8.93)  | ⊕○○○ very low |
| Sham vs High definition 2 mA Anode tRNS at AF3,                                                          | 0.32 (0.01,8.26) | ⊕○○○ very low |  |  | 0.32 (0.01,8.27)  | ⊕○○○ very low |

|                                                                                                    |                  |          |  |  |                   |               |
|----------------------------------------------------------------------------------------------------|------------------|----------|--|--|-------------------|---------------|
| cathode at AF4, F2, F6, and FC4                                                                    |                  |          |  |  |                   |               |
| Sham vs 2 mA Anode tDCS at F3, cathode at TP3 (left TPJ)                                           | 0.18 (0.02,1.63) | ⊕⊕○○ low |  |  | 0.18 (0.02,1.63)  | ⊕⊕⊕⊕ high     |
| tVNS at left auricle vs Theta-range rTMS at Iz (vermal part of cerebellum)                         |                  |          |  |  | 0.75 (0.05,11.44) | ⊕○○○ very low |
| tVNS at left auricle vs 6 Hz priming rTMS at PT3 (left temporo-parietal cortex) + 1 Hz rTMS at PT3 |                  |          |  |  | 0.67 (0.01,41.32) | ⊕○○○ very low |
| tVNS at left auricle vs iTBS at Iz (vermal part of cerebellum)                                     |                  |          |  |  | 0.78 (0.07,8.23)  | ⊕○○○ very low |
| tVNS at left auricle vs 2 mA Anode tDCS at F3, cathode at F4                                       |                  |          |  |  | 0.60 (0.05,7.14)  | ⊕○○○ very low |
| tVNS at left auricle vs 2 mA Anode tDCS at F3Fp1, cathode at T3P3 (left TPJ)                       |                  |          |  |  | 0.33 (0.01,17.34) | ⊕○○○ very low |
| tVNS at left auricle vs High definition 2 mA Anode tRNS at AF3, cathode at AF4, F2, F6, and FC4    |                  |          |  |  | 0.32 (0.01,16.11) | ⊕○○○ very low |
| tVNS at left auricle vs 2 mA Anode tDCS at F3, cathode at TP3 (left TPJ)                           |                  |          |  |  | 0.18 (0.01,4.05)  | ⊕○○○ very low |

|                                                                                                                                  |  |  |  |  |                   |               |
|----------------------------------------------------------------------------------------------------------------------------------|--|--|--|--|-------------------|---------------|
| Theta-range rTMS at Iz (vermal part of cerebellum) vs 6 Hz priming rTMS at PT3 (left temporo-parietal cortex) + 1 Hz rTMS at PT3 |  |  |  |  | 0.89 (0.02,41.94) | ⊕○○○ very low |
| Theta-range rTMS at Iz (vermal part of cerebellum) vs iTBS at Iz (vermal part of cerebellum)                                     |  |  |  |  | 1.04 (0.17,6.53)  | ⊕○○○ very low |
| Theta-range rTMS at Iz (vermal part of cerebellum) vs 2 mA Anode tDCS at F3, cathode at F4                                       |  |  |  |  | 0.80 (0.11,5.84)  | ⊕○○○ very low |
| Theta-range rTMS at Iz (vermal part of cerebellum) vs 2 mA Anode tDCS at F3Fp1, cathode at T3P3 (left TPJ)                       |  |  |  |  | 0.44 (0.01,17.37) | ⊕○○○ very low |
| Theta-range rTMS at Iz (vermal part of cerebellum) vs High definition 2 mA Anode tRNS at AF3, cathode at AF4, F2, F6, and FC4    |  |  |  |  | 0.42 (0.01,16.12) | ⊕○○○ very low |
| Theta-range rTMS at Iz (vermal part of cerebellum) vs 2 mA                                                                       |  |  |  |  | 0.24 (0.02,3.72)  | ⊕○○○ very low |

|                                                                                                                                                       |  |  |  |  |                   |               |
|-------------------------------------------------------------------------------------------------------------------------------------------------------|--|--|--|--|-------------------|---------------|
| Anode tDCS at F3, cathode at TP3 (left TPJ)                                                                                                           |  |  |  |  |                   |               |
| 6 Hz priming rTMS at PT3 (left temporo-parietal cortex) + 1 Hz rTMS at PT3 vs iTBS at Iz (vermal part of cerebellum)                                  |  |  |  |  | 1.17 (0.03,42.93) | ⊕○○○ very low |
| 6 Hz priming rTMS at PT3 (left temporo-parietal cortex) + 1 Hz rTMS at PT3 vs 2 mA Anode tDCS at F3, cathode at F4                                    |  |  |  |  | 0.90 (0.02,35.76) | ⊕○○○ very low |
| 6 Hz priming rTMS at PT3 (left temporo-parietal cortex) + 1 Hz rTMS at PT3 vs 2 mA Anode tDCS at F3Fp1, cathode at T3P3 (left TPJ)                    |  |  |  |  | 0.50 (0.00,60.77) | ⊕○○○ very low |
| 6 Hz priming rTMS at PT3 (left temporo-parietal cortex) + 1 Hz rTMS at PT3 vs High definition 2 mA Anode tRNS at AF3, cathode at AF4, F2, F6, and FC4 |  |  |  |  | 0.47 (0.00,56.64) | ⊕○○○ very low |
| 6 Hz priming rTMS at PT3 (left temporo-parietal cortex) + 1                                                                                           |  |  |  |  | 0.28 (0.00,17.02) | ⊕○○○ very low |



|                                                                                                                   |  |  |  |  |                   |               |
|-------------------------------------------------------------------------------------------------------------------|--|--|--|--|-------------------|---------------|
| Hz rTMS at PT3 vs 2 mA Anode tDCS at F3, cathode at TP3 (left TPJ)                                                |  |  |  |  |                   |               |
| iTBS at Iz (vermal part of cerebellum) vs 2 mA Anode tDCS at F3, cathode at F4                                    |  |  |  |  | 0.77 (0.18,3.26)  | ⊕○○○ very low |
| iTBS at Iz (vermal part of cerebellum) vs 2 mA Anode tDCS at F3Fp1, cathode at T3P3 (left TPJ)                    |  |  |  |  | 0.43 (0.01,12.82) | ⊕○○○ very low |
| iTBS at Iz (vermal part of cerebellum) vs High definition 2 mA Anode tRNS at AF3, cathode at AF4, F2, F6, and FC4 |  |  |  |  | 0.40 (0.01,11.88) | ⊕○○○ very low |
| iTBS at Iz (vermal part of cerebellum) vs 2 mA Anode tDCS at F3, cathode at TP3 (left TPJ)                        |  |  |  |  | 0.24 (0.02,2.47)  | ⊕⊕○○ low      |
| 2 mA Anode tDCS at F3, cathode at F4 vs 2 mA Anode tDCS at F3Fp1, cathode at T3P3 (left TPJ)                      |  |  |  |  | 0.56 (0.02,18.12) | ⊕○○○ very low |
| 2 mA Anode tDCS at F3, cathode at F4 vs High definition 2 mA Anode tRNS at AF3,                                   |  |  |  |  | 0.53 (0.02,16.79) | ⊕○○○ very low |

|                                                                                                                                 |  |  |  |  |                   |               |
|---------------------------------------------------------------------------------------------------------------------------------|--|--|--|--|-------------------|---------------|
| cathode at AF4, F2, F6, and FC4                                                                                                 |  |  |  |  |                   |               |
| 2 mA Anode tDCS at F3, cathode at F4 vs 2 mA Anode tDCS at F3, cathode at TP3 (left TPJ)                                        |  |  |  |  | 0.31 (0.03,3.62)  | ⊕○○○ very low |
| 2 mA Anode tDCS at F3Fp1, cathode at T3P3 (left TPJ) vs High definition 2 mA Anode tRNS at AF3, cathode at AF4, F2, F6, and FC4 |  |  |  |  | 0.95 (0.01,97.47) | ⊕○○○ very low |
| 2 mA Anode tDCS at F3Fp1, cathode at T3P3 (left TPJ) vs 2 mA Anode tDCS at F3, cathode at TP3 (left TPJ)                        |  |  |  |  | 0.55 (0.01,28.56) | ⊕○○○ very low |
| High definition 2 mA Anode tRNS at AF3, cathode at AF4, F2, F6, and FC4 vs 2 mA Anode tDCS at F3, cathode at TP3 (left TPJ)     |  |  |  |  | 0.58 (0.01,29.65) | ⊕○○○ very low |

We followed Cochrane Handbook for GRADE ratings in BMJ<sup>43</sup> and one important network meta-analysis in Lancet<sup>44</sup> for quality assessment

Abbreviation: 95%CI: 95% confidence interval; a-tDCS-F3 + c-tDCS-F4: 2 mA Anode tDCS at F3, cathode at F4; a-tDCS-F3 + c-tDCS-Fp2: 2 mA Anode tDCS at F3, cathode at Fp2; a-tDCS-F3 + c-tDCS-TP3: 2 mA Anode tDCS at F3, cathode at TP3 (left TPJ); a-tDCS-F3Fp1 + c-tDCS-F4Fp2: 2 mA Anode tDCS at F3Fp1, cathode at F4Fp2; a-tDCS-F3Fp1 + c-tDCS-TP3: 2 mA Anode tDCS at F3Fp1, cathode at T3P3 (left TPJ); a-tDCS-TP3 + c-tDCS-F3Fp1: 2 mA Cathode tDCS at F3Fp1, anode at T3P3 (left TPJ); DLPFC: dorsolateral prefrontal cortex; ehf-dTMS-F3: 20 Hz deep rTMS at left DLPFC (F3); ehf-rTMS-F3: extreme hf (20Hz) rTMS at left DLPFC (F3); ehf-rTMS-F3F4: extreme hf (20Hz) rTMS at left DLPFC (F3) and right DLPFC (F4); hd-a-tDCS-F3 + c-tDCS-AF3F7FC5FC1: High definition 2 mA Anode tDCS at F3, cathode at AF3, F7, FC5, and FC1; hd-tRNS-AF3AF4F2F6FC4: High definition 2 mA Anode tRNS at AF3, cathode at AF4, F2, F6, and FC4; hf-rTMS-F3: hf (10Hz) rTMS at left DLPFC (F3); hf-rTMS-F3F4: hf (10Hz) rTMS at left PFC (F3) and right PFC (F4); iTBS: intermittent theta-burst stimulation; iTBS-F3: iTBS at left DLPFC (F3); iTBS-lz : iTBS at lz (vermal part of cerebellum); lf-dTMS-PT3: 1 Hz deep rTMS at PT3 (left temporo-parietal cortex); lf-rTMS-F4: 1 Hz rTMS at right PFC (F4); lf-rTMS-PT3: 1 Hz rTMS at PT3 (left temporo-parietal cortex); MRI: magnetic resonance imaging; NIBS: noninvasive brain stimulation; NMA: network meta-analysis; OR: odds ratio; PRISMA: Preferred Reporting Items for Systematic Reviews and Meta-Analyses; prTMS-PT3 + lf-rTMS-PT3: 6 Hz priming rTMS at PT3 (left temporo-parietal cortex) + 1 Hz rTMS at PT3; RCT: randomized controlled trial; rTMS: repetitive transcranial magnetic stimulation; SMD: standardized mean difference; SUCRA: surface under the cumulative ranking curve; tACS-F3Fp1-TP3: 2 mA 10Hz tACS at F3Fp1 to T3P3 (TPJ); TBS: theta-burst stimulation; tDCS: transcranial direct current stimulation; the-rTMS-lz : Theta-range rTMS at lz (vermal part of cerebellum); tRNS: transcranial random noise stimulation; tVNS: transcutaneous vagal nerve stimulation; tVNS: tVNS at left auricle; vmPFC: ventromedial prefrontal cortex; VTA: ventral tegmental area





|                             |                             |                             |                             |                    |                    |                    |                    |                    |                    |                    |                    |                    |                    |                    |                    |                    |                    |                    |                    |                   |                             |                                                    |
|-----------------------------|-----------------------------|-----------------------------|-----------------------------|--------------------|--------------------|--------------------|--------------------|--------------------|--------------------|--------------------|--------------------|--------------------|--------------------|--------------------|--------------------|--------------------|--------------------|--------------------|--------------------|-------------------|-----------------------------|----------------------------------------------------|
| <b>*-2.53 (-4.12,-0.94)</b> | <b>*-1.66 (-2.87,-0.45)</b> | <b>*-1.63 (-3.08,-0.18)</b> | -1.63 (-3.29,0.03)          | -1.19 (-2.48,0.10) | -0.92 (-2.27,0.43) | -0.79 (-1.92,0.33) | -0.77 (-1.87,0.33) | -0.84 (-2.55,0.88) | -0.77 (-2.53,0.98) | -0.73 (-1.97,0.50) | -0.72 (-2.26,0.82) | -0.72 (-2.28,0.83) | -0.57 (-2.23,1.09) | -0.53 (-2.15,1.10) | -0.53 (-1.96,0.91) | -0.44 (-1.74,0.86) | -0.15 (-1.83,1.53) | -0.34 (-1.41,0.73) | -0.29 (-1.50,0.93) | 0.01 (-1.69,1.72) | 1 Hz rTMS at right PFC (F4) |                                                    |
| <b>*-2.54 (-4.09,-0.98)</b> | <b>*-1.66 (-2.82,-0.50)</b> | <b>*-1.64 (-3.05,-0.23)</b> | <b>*-1.63 (-3.26,-0.01)</b> | -1.19 (-2.44,0.05) | -0.93 (-2.24,0.38) | -0.80 (-1.87,0.27) | -0.78 (-1.82,0.27) | -0.84 (-2.52,0.84) | -0.78 (-2.50,0.95) | -0.74 (-1.93,0.45) | -0.73 (-2.23,0.78) | -0.73 (-2.25,0.79) | -0.58 (-2.21,1.05) | -0.53 (-2.13,1.06) | -0.53 (-1.92,0.86) | -0.45 (-1.70,0.81) | -0.16 (-1.80,1.49) | -0.35 (-1.37,0.67) | -0.29 (-1.46,0.87) | 0.01 (-1.66,1.68) | -0.01 (-1.48,1.47)          | Theta-range rTMS at Iz (vermal part of cerebellum) |

Pairwise (upper-right portion) and network (lower-left portion) meta-analysis results are presented as estimate effect sizes for the outcome of improvement of negative symptoms in patients with schizophrenia/schizoaffective disorder. Interventions are reported in order of mean ranking of improvement of negative symptoms, and outcomes are expressed as standardized mean difference (SMD) (95% confidence intervals). For the pairwise meta-analyses, SMD of less than 0 indicate that the treatment specified in the row got more improvement than that specified in the column. For the network meta-analysis (NMA), SMD of less than 0 indicate that the treatment specified in the column got more improvement than that specified in the row. Bold results marked with \* indicate statistical significance.

**eTable 10B: League table of the tolerability in aspect of drop-out rate**

|                                                    |                         |                                   |                                           |                             |                                       |                                                                         |                                                      |                                       |                                                 |                                                      |                     |                            |                            |  |  |  |  |  |  |                             |                             |  |
|----------------------------------------------------|-------------------------|-----------------------------------|-------------------------------------------|-----------------------------|---------------------------------------|-------------------------------------------------------------------------|------------------------------------------------------|---------------------------------------|-------------------------------------------------|------------------------------------------------------|---------------------|----------------------------|----------------------------|--|--|--|--|--|--|-----------------------------|-----------------------------|--|
| hf (10Hz) rTMS at left PFC (F3) and right PFC (F4) |                         |                                   |                                           |                             |                                       |                                                                         |                                                      |                                       |                                                 |                                                      |                     |                            |                            |  |  |  |  |  |  | 0.33<br>(0.04,2.69)<br>n=1  |                             |  |
| 0.68<br>(0.06,8.30)                                | iTBS at left DLPFC (F3) | 1.04<br>(0.10,10.45)<br>n=2       | 0.44<br>(0.06,3.16)<br>n=2                |                             |                                       |                                                                         |                                                      |                                       |                                                 |                                                      |                     |                            |                            |  |  |  |  |  |  | 0.42<br>(0.10,1.73)<br>n=3  |                             |  |
| 0.49<br>(0.06,4.16)                                | 0.71<br>(0.17,2.99)     | hf (10Hz) rTMS at left DLPFC (F3) | 0.46<br>(0.19,1.12)<br>n=3                |                             |                                       |                                                                         |                                                      |                                       |                                                 |                                                      |                     |                            |                            |  |  |  |  |  |  | 0.78<br>(0.46,1.32)<br>n=8  |                             |  |
| 0.36<br>(0.04,3.08)                                | 0.53<br>(0.13,2.19)     | 0.75<br>(0.40,1.39)               | extreme hf (20Hz) rTMS at left DLPFC (F3) |                             |                                       |                                                                         |                                                      |                                       |                                                 |                                                      |                     |                            |                            |  |  |  |  |  |  | 0.87<br>(0.48,1.58)<br>n=8  |                             |  |
| 0.36<br>(0.03,4.63)                                | 0.53<br>(0.07,3.93)     | 0.74<br>(0.16,3.51)               | 0.99<br>(0.21,4.64)                       | 1 Hz rTMS at right PFC (F4) |                                       |                                                                         |                                                      |                                       |                                                 |                                                      |                     |                            |                            |  |  |  |  |  |  | 0.92<br>(0.21,4.00)<br>n=1  |                             |  |
| 0.38<br>(0.01,14.15)                               | 0.56<br>(0.02,14.44)    | 0.78<br>(0.04,15.65)              | 1.05<br>(0.05,20.82)                      | 1.05<br>(0.04,28.49)        | 2 mA 10Hz tACS at F3Fp1 to T3P3 (TPJ) |                                                                         |                                                      |                                       |                                                 |                                                      |                     |                            |                            |  |  |  |  |  |  | 0.87<br>(0.05,16.67)<br>n=1 |                             |  |
| 0.33<br>(0.01,12.50)                               | 0.49<br>(0.02,12.77)    | 0.69<br>(0.03,13.85)              | 0.92<br>(0.05,18.43)                      | 0.92<br>(0.03,25.19)        | 0.88<br>(0.01,57.33)                  | High definition 2 mA Anode tDCS at F3, cathode at AF3, F7, FC5, and FC1 |                                                      |                                       |                                                 |                                                      |                     |                            |                            |  |  |  |  |  |  | 1.00<br>(0.05,19.36)<br>n=1 |                             |  |
| 0.33<br>(0.02,5.45)                                | 0.49<br>(0.05,4.91)     | 0.69<br>(0.10,4.71)               | 0.92<br>(0.13,6.24)                       | 0.92<br>(0.09,9.86)         | 0.88<br>(0.03,28.64)                  | 1.00<br>(0.03,33.06)                                                    | 1 Hz deep rTMS at PT3 (left temporo-parietal cortex) |                                       |                                                 |                                                      |                     |                            |                            |  |  |  |  |  |  |                             | 1.00<br>(0.16,6.42)<br>n=1  |  |
| 0.33<br>(0.02,5.33)                                | 0.49<br>(0.05,4.78)     | 0.69<br>(0.10,4.55)               | 0.92<br>(0.14,6.04)                       | 0.92<br>(0.09,9.59)         | 0.88<br>(0.03,28.12)                  | 1.00<br>(0.03,32.46)                                                    | 1.00<br>(0.07,13.53)                                 | 2 mA Anode tDCS at F3, cathode at Fp2 |                                                 |                                                      |                     |                            |                            |  |  |  |  |  |  |                             | 1.00<br>(0.16,6.20)<br>n=1  |  |
| 0.33<br>(0.01,12.26)                               | 0.49<br>(0.02,12.50)    | 0.69<br>(0.03,13.54)              | 0.92<br>(0.05,18.01)                      | 0.92<br>(0.03,24.67)        | 0.88<br>(0.01,56.40)                  | 1.00<br>(0.02,64.99)                                                    | 1.00<br>(0.03,32.41)                                 | 1.00<br>(0.03,31.82)                  | 1 Hz rTMS at PT3 (left temporo-parietal cortex) |                                                      |                     |                            |                            |  |  |  |  |  |  |                             | 1.00<br>(0.05,18.92)<br>n=1 |  |
| 0.33<br>(0.01,12.50)                               | 0.49<br>(0.02,12.77)    | 0.69<br>(0.03,13.85)              | 0.92<br>(0.05,18.43)                      | 0.92<br>(0.03,25.19)        | 0.87<br>(0.05,16.74)                  | 1.00<br>(0.02,66.06)                                                    | 1.00<br>(0.03,33.06)                                 | 1.00<br>(0.03,32.46)                  | 1.00<br>(0.02,64.99)                            | 2 mA Cathode tDCS at F3Fp1, anode at T3P3 (left TPJ) |                     |                            |                            |  |  |  |  |  |  |                             | 1.00<br>(0.05,19.36)<br>n=1 |  |
| 0.33<br>(0.04,2.69)                                | 0.49<br>(0.12,1.92)     | 0.69<br>(0.41,1.14)               | 0.92<br>(0.57,1.47)                       | 0.92<br>(0.21,4.00)         | 0.88<br>(0.05,16.74)                  | 1.00<br>(0.05,19.36)                                                    | 1.00<br>(0.16,6.42)                                  | 1.00<br>(0.16,6.20)                   | 1.00<br>(0.05,18.91)                            | 1.00<br>(0.05,19.36)                                 | Sham                | 1.00<br>(0.11,8.95)<br>n=1 | 0.75<br>(0.15,3.79)<br>n=1 |  |  |  |  |  |  |                             | 0.78<br>(0.33,1.86)<br>n=3  |  |
| 0.33<br>(0.02,6.87)                                | 0.49<br>(0.04,6.47)     | 0.69<br>(0.07,6.50)               | 0.92<br>(0.10,8.63)                       | 0.92<br>(0.07,12.90)        | 0.88<br>(0.02,34.56)                  | 1.00<br>(0.03,39.86)                                                    | 1.00<br>(0.06,17.71)                                 | 1.00<br>(0.06,17.31)                  | 1.00<br>(0.03,39.12)                            | 1.00<br>(0.03,39.86)                                 | 1.00<br>(0.11,8.95) | tVNS at left auricle       |                            |  |  |  |  |  |  |                             |                             |  |
| 0.25<br>(0.02,3.51)                                | 0.37<br>(0.04,3.05)     | 0.51<br>(0.09,2.81)               | 0.69<br>(0.13,3.72)                       | 0.69<br>(0.08,6.16)         | 0.66<br>(0.02,19.03)                  | 0.75<br>(0.03,21.97)                                                    | 0.75<br>(0.06,8.83)                                  | 0.75<br>(0.07,8.61)                   | 0.75<br>(0.03,21.52)                            | 0.75<br>(0.03,21.97)                                 | 0.75<br>(0.15,3.79) | 0.75<br>(0.05,11.44)       | Theta-range rTMS at Iz     |  |  |  |  |  |  |                             |                             |  |







## eReferences

1. Page MJ, McKenzie JE, Bossuyt PM, et al. The PRISMA 2020 statement: an updated guideline for reporting systematic reviews. *Bmj*. 2021;372:n71. 10.1136/bmj.n71
2. Yu L, Fang X, Chen Y, Wang Y, Wang D, Zhang C. Efficacy of transcranial direct current stimulation in ameliorating negative symptoms and cognitive impairments in schizophrenia: A systematic review and meta-analysis. *Schizophr Res*. 2020;224:2-10. 10.1016/j.schres.2020.10.006
3. Cheng PWC, Louie LLC, Wong YL, et al. The effects of transcranial direct current stimulation (tDCS) on clinical symptoms in schizophrenia: A systematic review and meta-analysis. *Asian J Psychiatr*. 2020;53:102392. 10.1016/j.ajp.2020.102392
4. Kim J, Iwata Y, Plitman E, et al. A meta-analysis of transcranial direct current stimulation for schizophrenia: "Is more better?". *Journal of psychiatric research*. 2019;110:117-126. 10.1016/j.jpsychires.2018.12.009
5. Aleman A, Enriquez-Geppert S, Knegtering H, Dlabac-de Lange JJ. Moderate effects of noninvasive brain stimulation of the frontal cortex for improving negative symptoms in schizophrenia: Meta-analysis of controlled trials. *Neurosci Biobehav Rev*. 2018;89:111-118. 10.1016/j.neubiorev.2018.02.009
6. Kennedy NI, Lee WH, Frangou S. Efficacy of non-invasive brain stimulation on the symptom dimensions of schizophrenia: A meta-analysis of randomized controlled trials. *European psychiatry : the journal of the Association of European Psychiatrists*. 2018;49:69-77. 10.1016/j.eurpsy.2017.12.025
7. Osoegawa C, Gomes JS, Grigolon RB, et al. Non-invasive brain stimulation for negative symptoms in schizophrenia: An updated systematic review and meta-analysis. *Schizophr Res*. 2018;197:34-44. 10.1016/j.schres.2018.01.010
8. He H, Lu J, Yang L, et al. Repetitive transcranial magnetic stimulation for treating the symptoms of schizophrenia: A PRISMA compliant meta-analysis. *Clin Neurophysiol*. 2017;128(5):716-724. 10.1016/j.clinph.2017.02.007
9. Zhang Y, Liang W, Yang S, Dai P, Shen L, Wang C. Repetitive transcranial magnetic stimulation for hallucination in schizophrenia

spectrum disorders: A meta-analysis. *Neural Regen Res.* 2013;8(28):2666-2676. 10.3969/j.issn.1673-5374.2013.28.009

10. Dlabac-de Lange JJ, Knegtering R, Aleman A. Repetitive transcranial magnetic stimulation for negative symptoms of schizophrenia: review and meta-analysis. *The Journal of clinical psychiatry.* 2010;71(4):411-418. 10.4088/JCP.08r04808yel
11. Slotema CW, Blom JD, Hoek HW, Sommer IE. Should we expand the toolbox of psychiatric treatment methods to include Repetitive Transcranial Magnetic Stimulation (rTMS)? A meta-analysis of the efficacy of rTMS in psychiatric disorders. *The Journal of clinical psychiatry.* 2010;71(7):873-884. 10.4088/JCP.08m04872gre
12. Haller N, Hasan A, Padberg F, et al. [Transcranial electrical brain stimulation methods for treatment of negative symptoms in schizophrenia]. *Nervenarzt.* 2021. 10.1007/s00115-021-01065-5
13. Andrade C. Transcranial Direct Current Stimulation for Negative Symptoms of Schizophrenia: Why the Reader Must Choose a Clinically Relevant Outcome. *The Journal of clinical psychiatry.* 2020;81(1). 10.4088/JCP.20f13256
14. Escelsior A, Belvederi Murri M, Calcagno P, et al. Effectiveness of Cerebellar Circuitry Modulation in Schizophrenia: A Systematic Review. *J Nerv Ment Dis.* 2019;207(11):977-986. 10.1097/NMD.0000000000001064
15. Pontillo M, Costanzo F, Menghini D, et al. Use of Transcranial Direct Stimulation in the Treatment of Negative Symptoms of Schizophrenia. *Clin EEG Neurosci.* 2018;49(1):18-26. 10.1177/1550059417746531
16. Dougall N, Maayan N, Soares-Weiser K, McDermott LM, McIntosh A. Transcranial Magnetic Stimulation for Schizophrenia. *Schizophr Bull.* 2015;41(6):1220-1222. 10.1093/schbul/sbv121
17. Brunoni AR, Shiozawa P, Truong D, et al. Understanding tDCS effects in schizophrenia: a systematic review of clinical data and an integrated computation modeling analysis. *Expert Rev Med Devices.* 2014;11(4):383-394. 10.1586/17434440.2014.911082
18. Andrade C. Transcranial direct current stimulation for refractory auditory hallucinations in schizophrenia. *The Journal of clinical psychiatry.* 2013;74(11):e1054-1058. 10.4088/JCP.13f08826
19. Prikryl R, Kucerova HP. Can repetitive transcranial magnetic stimulation be considered effective treatment option for negative symptoms of schizophrenia? *The journal of ECT.* 2013;29(1):67-74. 10.1097/YCT.0b013e318270295f
20. Wobrock T, Hasan A, Falkai P. Innovative treatment approaches in schizophrenia enhancing neuroplasticity: aerobic exercise,

erythropoietin and repetitive transcranial magnetic stimulation. *Current pharmaceutical biotechnology*. 2012;13(8):1595-1605.  
10.2174/138920112800784763

21. Sun CH, Jiang WL, Cai DB, et al. Adjunctive multi-session transcranial direct current stimulation for neurocognitive dysfunction in schizophrenia: A meta-analysis. *Asian J Psychiatr*. 2021;66:102887. 10.1016/j.ajp.2021.102887
22. Hsieh MT, Tseng PT, Wu YC, et al. Effects of different pharmacologic smoking cessation treatments on body weight changes and success rates in patients with nicotine dependence: A network meta-analysis. *Obes Rev*. 2019. 10.1111/obr.12835
23. Wu YC, Tseng PT, Tu YK, et al. Association of Delirium Response and Safety of Pharmacological Interventions for the Management and Prevention of Delirium: A Network Meta-analysis. *JAMA Psychiatry*. 2019. 10.1001/jamapsychiatry.2018.4365
24. Tseng PT, Yang CP, Su KP, et al. The association between melatonin and episodic migraine: a pilot network meta-analysis of randomized controlled trials to compare the prophylactic effects with exogenous melatonin supplementation and pharmacotherapy. *Journal of pineal research*. 2020:e12663. 10.1111/jpi.12663
25. Yang CP, Tseng PT, Pei-Chen Chang J, Su H, Satyanarayanan SK, Su KP. Melatonergic agents in the prevention of delirium: A network meta-analysis of randomized controlled trials. *Sleep Med Rev*. 2020;50:101235. 10.1016/j.smrv.2019.101235
26. Chen JJ, Zeng BS, Wu CN, et al. Association of Central Noninvasive Brain Stimulation Interventions With Efficacy and Safety in Tinnitus Management: A Meta-analysis. *JAMA Otolaryngol Head Neck Surg*. 2020;146(9):801-809. 10.1001/jamaoto.2020.1497
27. Tseng PT, Jeng JS, Zeng BS, et al. Efficacy of non-invasive brain stimulation interventions in reducing smoking frequency in patients with nicotine dependence: a systematic review and network meta-analysis of randomized controlled trials. *Addiction*. 2021. 10.1111/add.15624
28. Hung CM, Zeng BY, Zeng BS, et al. The Efficacy of Transcranial Direct Current Stimulation in Enhancing Surgical Skill Acquisition: A Preliminary Meta-Analysis of Randomized Controlled Trials. *Brain Sci*. 2021;11(6). 10.3390/brainsci11060707
29. Zeng BY, Zeng BS, Chen YW, et al. Efficacy and acceptability of noninvasive brain stimulation interventions for weight reduction in obesity: a pilot network meta-analysis. *Int J Obes (Lond)*. 2021;45(8):1705-1716. 10.1038/s41366-021-00833-2
30. Chu CS, Li CT, Brunoni AR, et al. Cognitive effects and acceptability of non-invasive brain stimulation on Alzheimer's disease and mild

cognitive impairment: a component network meta-analysis. *Journal of neurology, neurosurgery, and psychiatry*. 2021;92(2):195-203. 10.1136/jnnp-2020-323870

31. Cheng YC, Zeng BY, Hung CM, et al. Effectiveness and acceptability of noninvasive brain and nerve stimulation techniques for migraine prophylaxis: a network meta-analysis of randomized controlled trials. *The journal of headache and pain*. 2022;23(1):28. 10.1186/s10194-022-01401-3
32. Zeng BY, Zeng BS, Chen YW, et al. Efficacy and acceptability of noninvasive brain stimulation interventions for weight reduction in obesity: a pilot network meta-analysis. *Int J Obes (Lond)*. 2021. 10.1038/s41366-021-00833-2
33. Li Z, Yin M, Lyu XL, Zhang LL, Du XD, Hung GC. Delayed effect of repetitive transcranial magnetic stimulation (rTMS) on negative symptoms of schizophrenia: Findings from a randomized controlled trial. *Psychiatry research*. 2016;240:333-335. 10.1016/j.psychres.2016.04.046
34. Higgins J, Green S. *Cochrane Handbook for Systematic Reviews of Interventions Version 5.0.2*. The Cochrane Collaboration; 2009.
35. White IR. Network meta-analysis. *Stata J*. 2015;15:951-985.
36. Cheng J, Pullenayegum E, Marshall JK, Iorio A, Thabane L. Impact of including or excluding both-armed zero-event studies on using standard meta-analysis methods for rare event outcome: a simulation study. *BMJ Open*. 2016;6(8):e010983. 10.1136/bmjopen-2015-010983
37. Brockhaus AC, Bender R, Skipka G. The Peto odds ratio viewed as a new effect measure. *Stat Med*. 2014;33(28):4861-4874. 10.1002/sim.6301
38. Tu YK. Use of generalized linear mixed models for network meta-analysis. *Medical decision making : an international journal of the Society for Medical Decision Making*. 2014;34(7):911-918. 10.1177/0272989x14545789
39. Lu G, Ades AE. Combination of direct and indirect evidence in mixed treatment comparisons. *Stat Med*. 2004;23(20):3105-3124. 10.1002/sim.1875
40. Kontopantelis E, Springate DA, Reeves D. A re-analysis of the Cochrane Library data: the dangers of unobserved heterogeneity in meta-analyses. *PloS one*. 2013;8(7):e69930. 10.1371/journal.pone.0069930

41. Salanti G, Ades AE, Ioannidis JP. Graphical methods and numerical summaries for presenting results from multiple-treatment meta-analysis: an overview and tutorial. *J Clin Epidemiol*. 2011;64(2):163-171. 10.1016/j.jclinepi.2010.03.016
42. Higgins JP, Del Giovane C, Chaimani A, Caldwell DM, Salanti G. Evaluating the Quality of Evidence from a Network Meta-Analysis. *Value Health*. 2014;17(7):A324. 10.1016/j.jval.2014.08.572
43. Puhan MA, Schunemann HJ, Murad MH, et al. A GRADE Working Group approach for rating the quality of treatment effect estimates from network meta-analysis. *Bmj*. 2014;349:g5630. 10.1136/bmj.g5630
44. Cipriani A, Furukawa TA, Salanti G, et al. Comparative efficacy and acceptability of 21 antidepressant drugs for the acute treatment of adults with major depressive disorder: a systematic review and network meta-analysis. *Lancet*. 2018;391(10128):1357-1366. 10.1016/S0140-6736(17)32802-7
45. Fitzgerald PB, McQueen S, Daskalakis ZJ, Hoy KE. A negative pilot study of daily bimodal transcranial direct current stimulation in schizophrenia. *Brain stimulation*. 2014;7(6):813-816. 10.1016/j.brs.2014.08.002
46. Kamp D, Engelke C, Wobrock T, et al. Left prefrontal high-frequency rTMS may improve movement disorder in schizophrenia patients with predominant negative symptoms - A secondary analysis of a sham-controlled, randomized multicenter trial. *Schizophr Res*. 2019;204:445-447. 10.1016/j.schres.2018.09.017
47. Hansbauer M, Wobrock T, Kunze B, et al. Efficacy of high-frequency repetitive transcranial magnetic stimulation on PANSS factors in schizophrenia with predominant negative symptoms - Results from an exploratory re-analysis. *Psychiatry research*. 2018;263:22-29. 10.1016/j.psychres.2018.02.030
48. Guse B, Falkai P, Gruber O, et al. The effect of long-term high frequency repetitive transcranial magnetic stimulation on working memory in schizophrenia and healthy controls--a randomized placebo-controlled, double-blind fMRI study. *Behavioural brain research*. 2013;237:300-307. 10.1016/j.bbr.2012.09.034
49. Wagner E, Wobrock T, Kunze B, et al. Efficacy of high-frequency repetitive transcranial magnetic stimulation in schizophrenia patients with treatment-resistant negative symptoms treated with clozapine. *Schizophr Res*. 2019;208:370-376. 10.1016/j.schres.2019.01.021
50. Gan H, Zhu J, Zhuo K, et al. High frequency repetitive transcranial magnetic stimulation of dorsomedial prefrontal cortex for negative

symptoms in patients with schizophrenia: A double-blind, randomized controlled trial. *Psychiatry research*. 2021;299:113876.  
10.1016/j.psychres.2021.113876

51. Schneider AL, Schneider TL, Stark H. Repetitive transcranial magnetic stimulation (rTMS) as an augmentation treatment for the negative symptoms of schizophrenia: a 4-week randomized placebo controlled study. *Brain stimulation*. 2008;1(2):106-111.  
10.1016/j.brs.2008.01.001
52. Bulubas L, Goerigk S, Gomes JS, et al. Cognitive outcomes after tDCS in schizophrenia patients with prominent negative symptoms: Results from the placebo-controlled STARTS trial. *Schizophr Res*. 2021;235:44-51. 10.1016/j.schres.2021.07.008
53. Gordon PC, Valiengo L, de Paula VJR, et al. Changes in motor cortical excitability in schizophrenia following transcranial direct current stimulation. *Progress in neuro-psychopharmacology & biological psychiatry*. 2019;90:43-48. 10.1016/j.pnpbp.2018.11.004
54. Liemburg EJ, Dlabac-De Lange JJ, Bais L, Knegtering H, Aleman A. Effects of bilateral prefrontal rTMS on brain activation during social-emotional evaluation in schizophrenia: A double-blind, randomized, exploratory study. *Schizophr Res*. 2018;202:210-211.  
10.1016/j.schres.2018.06.051
55. Shiozawa P, Gomes JS, Ducos DV, et al. Effect of transcranial direct current stimulation (tDCS) over the prefrontal cortex combined with cognitive training for treating schizophrenia: a sham-controlled randomized clinical trial. *Trends Psychiatry Psychother*. 2016;38(3):175-177. 10.1590/2237-6089-2015-0043
56. Dlabac-de Lange JJ, Liemburg EJ, Bais L, et al. Effect of Bilateral Prefrontal rTMS on Left Prefrontal NAA and Glx Levels in Schizophrenia Patients with Predominant Negative Symptoms: An Exploratory Study. *Brain stimulation*. 2017;10(1):59-64.  
10.1016/j.brs.2016.08.002
57. Hasan A, Guse B, Cordes J, et al. Cognitive Effects of High-Frequency rTMS in Schizophrenia Patients With Predominant Negative Symptoms: Results From a Multicenter Randomized Sham-Controlled Trial. *Schizophr Bull*. 2016;42(3):608-618. 10.1093/schbul/sbv142
58. Dlabac-de Lange JJ, Liemburg EJ, Bais L, Renken RJ, Knegtering H, Aleman A. Effect of rTMS on brain activation in schizophrenia with negative symptoms: A proof-of-principle study. *Schizophr Res*. 2015;168(1-2):475-482. 10.1016/j.schres.2015.06.018
59. Slotema CW, Blom JD, de Weijer AD, et al. Can low-frequency repetitive transcranial magnetic stimulation really relieve medication-

resistant auditory verbal hallucinations? Negative results from a large randomized controlled trial. *Biological psychiatry*. 2011;69(5):450-456. 10.1016/j.biopsych.2010.09.051

60. Vercammen A, Knegtering H, Bruggeman R, et al. Effects of bilateral repetitive transcranial magnetic stimulation on treatment resistant auditory-verbal hallucinations in schizophrenia: a randomized controlled trial. *Schizophr Res*. 2009;114(1-3):172-179. 10.1016/j.schres.2009.07.013
61. Lee SH, Kim W, Chung YC, et al. A double blind study showing that two weeks of daily repetitive TMS over the left or right temporoparietal cortex reduces symptoms in patients with schizophrenia who are having treatment-refractory auditory hallucinations. *Neurosci Lett*. 2005;376(3):177-181. 10.1016/j.neulet.2004.11.048
62. Voineskos AN, Blumberger DM, Schifani C, et al. Effects of Repetitive Transcranial Magnetic Stimulation on Working Memory Performance and Brain Structure in People With Schizophrenia Spectrum Disorders: A Double-Blind, Randomized, Sham-Controlled Trial. *Biol Psychiatry Cogn Neurosci Neuroimaging*. 2021;6(4):449-458. 10.1016/j.bpsc.2020.11.011
63. Koops S, Blom JD, Bouachmir O, Slot MI, Neggers B, Sommer IE. Treating auditory hallucinations with transcranial direct current stimulation in a double-blind, randomized trial. *Schizophr Res*. 2018;201:329-336. 10.1016/j.schres.2018.06.010
64. Dollfus S, Jaafari N, Guillin O, et al. High-Frequency Neuronavigated rTMS in Auditory Verbal Hallucinations: A Pilot Double-Blind Controlled Study in Patients With Schizophrenia. *Schizophr Bull*. 2018;44(3):505-514. 10.1093/schbul/sbx127
65. Impey D, Baddeley A, Nelson R, Labelle A, Knott V. Effects of transcranial direct current stimulation on the auditory mismatch negativity response and working memory performance in schizophrenia: a pilot study. *Journal of neural transmission*. 2017;124(11):1489-1501. 10.1007/s00702-017-1783-y
66. Koops S, van Dellen E, Schutte MJ, Nieuwdorp W, Neggers SF, Sommer IE. Theta Burst Transcranial Magnetic Stimulation for Auditory Verbal Hallucinations: Negative Findings From a Double-Blind-Randomized Trial. *Schizophr Bull*. 2016;42(1):250-257. 10.1093/schbul/sbv100
67. Prikryl R, Ustohal L, Kucerova HP, et al. Repetitive transcranial magnetic stimulation reduces cigarette consumption in schizophrenia patients. *Progress in neuro-psychopharmacology & biological psychiatry*. 2014;49:30-35. 10.1016/j.pnpbp.2013.10.019



68. Chen X, Ji GJ, Zhu C, et al. Neural Correlates of Auditory Verbal Hallucinations in Schizophrenia and the Therapeutic Response to Theta-Burst Transcranial Magnetic Stimulation. *Schizophr Bull.* 2019;45(2):474-483. 10.1093/schbul/sby054
69. Pobric G, Hulleman J, Lavidor M, et al. Seeing the World as it is: Mimicking Veridical Motion Perception in Schizophrenia Using Non-invasive Brain Stimulation in Healthy Participants. *Brain Topogr.* 2018;31(5):827-837. 10.1007/s10548-018-0639-6
70. Dunn W, Rasseovsky Y, Wynn J, et al. The effect of bilateral transcranial direct current stimulation on early auditory processing in schizophrenia: a preliminary study. *Journal of neural transmission.* 2017;124(9):1145-1149. 10.1007/s00702-017-1752-5
71. Palm U, Hasan A, Keeser D, Falkai P, Padberg F. Transcranial random noise stimulation for the treatment of negative symptoms in schizophrenia. *Schizophr Res.* 2013;146(1-3):372-373. 10.1016/j.schres.2013.03.003
72. Demirtas-Tatlidede A, Freitas C, Cromer JR, et al. Safety and proof of principle study of cerebellar vermal theta burst stimulation in refractory schizophrenia. *Schizophr Res.* 2010;124(1-3):91-100. 10.1016/j.schres.2010.08.015
73. Goyal N, Nizamie SH, Desarkar P. Efficacy of adjuvant high frequency repetitive transcranial magnetic stimulation on negative and positive symptoms of schizophrenia: preliminary results of a double-blind sham-controlled study. *The Journal of neuropsychiatry and clinical neurosciences.* 2007;19(4):464-467. 10.1176/jnp.2007.19.4.464
74. Sachdev P, Loo C, Mitchell P, Malhi G. Transcranial magnetic stimulation for the deficit syndrome of schizophrenia: a pilot investigation. *Psychiatry Clin Neurosci.* 2005;59(3):354-357. 10.1111/j.1440-1819.2005.01382.x
75. Boden R, Bengtsson J, Thornblom E, Struckmann W, Persson J. Dorsomedial prefrontal theta burst stimulation to treat anhedonia, avolition, and blunted affect in schizophrenia or depression - a randomized controlled trial. *Journal of affective disorders.* 2021;290:308-315. 10.1016/j.jad.2021.04.053
76. Cordes J, Thunker J, Agelink MW, et al. Effects of 10 Hz repetitive transcranial magnetic stimulation (rTMS) on clinical global impression in chronic schizophrenia. *Psychiatry research.* 2010;177(1-2):32-36. 10.1016/j.psychres.2009.01.014
77. Haller N, Hasan A, Padberg F, et al. [Transcranial electrical brain stimulation methods for treatment of negative symptoms in schizophrenia]. *Nervenarzt.* 2022;93(1):41-50. 10.1007/s00115-021-01065-5
78. Valiengo L, Gordon PC, de Carvalho JB, et al. Schizophrenia Treatment with electric Transcranial Stimulation (STARTS): design,

rationale and objectives of a randomized, double-blinded, sham-controlled trial. *Trends Psychiatry Psychother.* 2019;41(2):104-111. 10.1590/2237-6089-2018-0047

79. Basavaraju R, Ithal D, Thanki MV, et al. Intermittent theta burst stimulation of cerebellar vermis enhances fronto-cerebellar resting state functional connectivity in schizophrenia with predominant negative symptoms: A randomized controlled trial. *Schizophr Res.* 2021;238:108-120. 10.1016/j.schres.2021.10.005
80. Bation R, Magnin C, Poulet E, Mondino M, Brunelin J. Intermittent theta burst stimulation for negative symptoms of schizophrenia-A double-blind, sham-controlled pilot study. *NPJ Schizophr.* 2021;7(1):10. 10.1038/s41537-021-00138-3
81. Chang CC, Lin YY, Tzeng NS, Kao YC, Chang HA. Adjunct high-frequency transcranial random noise stimulation over the lateral prefrontal cortex improves negative symptoms of schizophrenia: A randomized, double-blind, sham-controlled pilot study. *Journal of psychiatric research.* 2021;132:151-160. 10.1016/j.jpsychires.2020.10.008
82. Chauhan P, Garg S, Tikka SK, Khattri S. Efficacy of Intensive Cerebellar Intermittent Theta Burst Stimulation (iCiTBS) in Treatment-Resistant Schizophrenia: a Randomized Placebo-Controlled Study. *Cerebellum.* 2021;20(1):116-123. 10.1007/s12311-020-01193-9
83. Dharani R, Goyal N, Mukherjee A, Umesh S. Adjuvant High-Definition Transcranial Direct Current Stimulation for Negative Symptoms in Schizophrenia: A Pilot Study. *The journal of ECT.* 2021;37(3):195-201. 10.1097/YCT.0000000000000756
84. Pan Z, Xiong D, Xiao H, et al. The Effects of Repetitive Transcranial Magnetic Stimulation in Patients with Chronic Schizophrenia: Insights from EEG Microstates. *Psychiatry research.* 2021;299:113866. 10.1016/j.psychres.2021.113866
85. Zhu L, Zhang W, Zhu Y, et al. Cerebellar theta burst stimulation for the treatment of negative symptoms of schizophrenia: A multicenter, double-blind, randomized controlled trial. *Psychiatry research.* 2021;305:114204. 10.1016/j.psychres.2021.114204
86. Chang CC, Kao YC, Chao CY, Tzeng NS, Chang HA. Examining bi-anodal transcranial direct current stimulation (tDCS) over bilateral dorsolateral prefrontal cortex coupled with bilateral extracephalic references as a treatment for negative symptoms in non-acute schizophrenia patients: A randomized, double-blind, sham-controlled trial. *Progress in neuro-psychopharmacology & biological psychiatry.* 2020;96:109715. 10.1016/j.pnpbp.2019.109715
87. Guan HY, Zhao JM, Wang KQ, et al. High-frequency neuronavigated rTMS effect on clinical symptoms and cognitive dysfunction: a

pilot double-blind, randomized controlled study in Veterans with schizophrenia. *Transl Psychiatry*. 2020;10(1):79. 10.1038/s41398-020-0745-6

88. Kumar N, Vishnubhatla S, Wadhawan AN, Minhas S, Gupta P. A randomized, double blind, sham-controlled trial of repetitive transcranial magnetic stimulation (rTMS) in the treatment of negative symptoms in schizophrenia. *Brain stimulation*. 2020;13(3):840-849. 10.1016/j.brs.2020.02.016
89. Li X, Yuan X, Kang Y, et al. A synergistic effect between family intervention and rTMS improves cognitive and negative symptoms in schizophrenia: A randomized controlled trial. *Journal of psychiatric research*. 2020;126:81-91. 10.1016/j.jpsychires.2020.04.009
90. Singh S, Kumar N, Verma R, Nehra A. The safety and efficacy of adjunctive 20-Hz repetitive transcranial magnetic stimulation for treatment of negative symptoms in patients with schizophrenia: A double-blinded, randomized, sham-controlled study. *Indian journal of psychiatry*. 2020;62(1):21-29. 10.4103/psychiatry.IndianJPsychiatry\_361\_19
91. Valiengo L, Goerigk S, Gordon PC, et al. Efficacy and Safety of Transcranial Direct Current Stimulation for Treating Negative Symptoms in Schizophrenia: A Randomized Clinical Trial. *JAMA psychiatry*. 2020;77(2):121-129. 10.1001/jamapsychiatry.2019.3199
92. Xiu MH, Guan HY, Zhao JM, et al. Cognitive Enhancing Effect of High-Frequency Neuronavigated rTMS in Chronic Schizophrenia Patients With Predominant Negative Symptoms: A Double-Blind Controlled 32-Week Follow-up Study. *Schizophr Bull*. 2020. 10.1093/schbul/sbaa035
93. Chang CC, Kao YC, Chao CY, Chang HA. Enhancement of cognitive insight and higher-order neurocognitive function by fronto-temporal transcranial direct current stimulation (tDCS) in patients with schizophrenia. *Schizophr Res*. 2019;208:430-438. 10.1016/j.schres.2018.12.052
94. Zhuo K, Tang Y, Song Z, et al. Repetitive transcranial magnetic stimulation as an adjunctive treatment for negative symptoms and cognitive impairment in patients with schizophrenia: a randomized, double-blind, sham-controlled trial. *Neuropsychiatric disease and treatment*. 2019;15:1141-1150. 10.2147/NDT.S196086
95. Gomes JS, Trevizol AP, Ducos DV, et al. Effects of transcranial direct current stimulation on working memory and negative symptoms in schizophrenia: a phase II randomized sham-controlled trial. *Schizophrenia research Cognition*. 2018;12:20-28. 10.1016/j.scog.2018.02.003

96. Jeon DW, Jung DU, Kim SJ, et al. Adjunct transcranial direct current stimulation improves cognitive function in patients with schizophrenia: A double-blind 12-week study. *Schizophr Res*. 2018;197:378-385. 10.1016/j.schres.2017.12.009
97. Mellin JM, Alagapan S, Lustenberger C, et al. Randomized trial of transcranial alternating current stimulation for treatment of auditory hallucinations in schizophrenia. *European psychiatry : the journal of the Association of European Psychiatrists*. 2018;51:25-33. 10.1016/j.eurpsy.2018.01.004
98. Hasan A, Wobrock T, Guse B, et al. Structural brain changes are associated with response of negative symptoms to prefrontal repetitive transcranial magnetic stimulation in patients with schizophrenia. *Molecular psychiatry*. 2017;22(6):857-864. 10.1038/mp.2016.161
99. Frohlich F, Burrello TN, Mellin JM, et al. Exploratory study of once-daily transcranial direct current stimulation (tDCS) as a treatment for auditory hallucinations in schizophrenia. *European psychiatry : the journal of the Association of European Psychiatrists*. 2016;33:54-60. 10.1016/j.eurpsy.2015.11.005
100. Garg S, Sinha VK, Tikka SK, Mishra P, Goyal N. The efficacy of cerebellar vermal deep high frequency (theta range) repetitive transcranial magnetic stimulation (rTMS) in schizophrenia: A randomized rater blind-sham controlled study. *Psychiatry research*. 2016;243:413-420. 10.1016/j.psychres.2016.07.023
101. Mondino M, Jardri R, Suaud-Chagny MF, Saoud M, Poulet E, Brunelin J. Effects of Fronto-Temporal Transcranial Direct Current Stimulation on Auditory Verbal Hallucinations and Resting-State Functional Connectivity of the Left Temporo-Parietal Junction in Patients With Schizophrenia. *Schizophr Bull*. 2016;42(2):318-326. 10.1093/schbul/sbv114
102. Palm U, Keeser D, Hasan A, et al. Prefrontal Transcranial Direct Current Stimulation for Treatment of Schizophrenia With Predominant Negative Symptoms: A Double-Blind, Sham-Controlled Proof-of-Concept Study. *Schizophr Bull*. 2016;42(5):1253-1261. 10.1093/schbul/sbw041
103. Dlabac-de Lange JJ, Bais L, van Es FD, et al. Efficacy of bilateral repetitive transcranial magnetic stimulation for negative symptoms of schizophrenia: results of a multicenter double-blind randomized controlled trial. *Psychological medicine*. 2015;45(6):1263-1275. 10.1017/S0033291714002360
104. Gan J, Duan H, Chen Z, et al. [Effectiveness and safety of high dose transcranial magnetic stimulation in schizophrenia with refractory

negative symptoms: a randomized controlled study]. *Zhonghua yi xue za zhi*. 2015;95(47):3808-3812.

105. Hasan A, Wolff-Menzler C, Pfeiffer S, et al. Transcutaneous noninvasive vagus nerve stimulation (tVNS) in the treatment of schizophrenia: a bicentric randomized controlled pilot study. *European archives of psychiatry and clinical neuroscience*. 2015;265(7):589-600. 10.1007/s00406-015-0618-9
106. Quan WX, Zhu XL, Qiao H, et al. The effects of high-frequency repetitive transcranial magnetic stimulation (rTMS) on negative symptoms of schizophrenia and the follow-up study. *Neurosci Lett*. 2015;584:197-201. 10.1016/j.neulet.2014.10.029
107. Ray P, Sinha VK, Tikka SK. Adjuvant low-frequency rTMS in treating auditory hallucinations in recent-onset schizophrenia: a randomized controlled study investigating the effect of high-frequency priming stimulation. *Annals of general psychiatry*. 2015;14:8. 10.1186/s12991-015-0046-2
108. Wobrock T, Guse B, Cordes J, et al. Left prefrontal high-frequency repetitive transcranial magnetic stimulation for the treatment of schizophrenia with predominant negative symptoms: a sham-controlled, randomized multicenter trial. *Biological psychiatry*. 2015;77(11):979-988. 10.1016/j.biopsych.2014.10.009
109. Rabany L, Deutsch L, Levkovitz Y. Double-blind, randomized sham controlled study of deep-TMS add-on treatment for negative symptoms and cognitive deficits in schizophrenia. *Journal of psychopharmacology*. 2014;28(7):686-690. 10.1177/0269881114533600
110. Zhao S, Kong J, Li S, Tong Z, Yang C, Zhong H. Randomized controlled trial of four protocols of repetitive transcranial magnetic stimulation for treating the negative symptoms of schizophrenia. *Shanghai Arch Psychiatry*. 2014;26(1):15-21. 10.3969/j.issn.1002-0829.2014.01.003
111. Prikryl R, Ustohal L, Prikrylova Kucerova H, et al. A detailed analysis of the effect of repetitive transcranial magnetic stimulation on negative symptoms of schizophrenia: a double-blind trial. *Schizophr Res*. 2013;149(1-3):167-173. 10.1016/j.schres.2013.06.015
112. Barr MS, Farzan F, Tran LC, Fitzgerald PB, Daskalakis ZJ. A randomized controlled trial of sequentially bilateral prefrontal cortex repetitive transcranial magnetic stimulation in the treatment of negative symptoms in schizophrenia. *Brain stimulation*. 2012;5(3):337-346. 10.1016/j.brs.2011.06.003
113. Brunelin J, Mondino M, Gassab L, et al. Examining transcranial direct-current stimulation (tDCS) as a treatment for hallucinations in

- schizophrenia. *The American journal of psychiatry*. 2012;169(7):719-724. 10.1176/appi.ajp.2012.11071091
114. Prikryl R, Mikl M, Prikrylova Kucerova H, et al. Does repetitive transcranial magnetic stimulation have a positive effect on working memory and neuronal activation in treatment of negative symptoms of schizophrenia? *Neuro endocrinology letters*. 2012;33(1):90-97.
115. Rosenberg O, Gersner R, Klein LD, Kotler M, Zangen A, Dannon P. Deep transcranial magnetic stimulation add-on for the treatment of auditory hallucinations: a double-blind study. *Annals of general psychiatry*. 2012;11:13. 10.1186/1744-859X-11-13
116. Zheng LN, Guo Q, Li H, Li CB, Wang JJ. [Effects of repetitive transcranial magnetic stimulation with different paradigms on the cognitive function and psychotic symptoms of schizophrenia patients]. *Beijing Da Xue Xue Bao Yi Xue Ban*. 2012;44(5):732-736.
117. Fitzgerald PB, Herring S, Hoy K, et al. A study of the effectiveness of bilateral transcranial magnetic stimulation in the treatment of the negative symptoms of schizophrenia. *Brain stimulation*. 2008;1(1):27-32. 10.1016/j.brs.2007.08.001
118. Mogg A, Purvis R, Eranti S, et al. Repetitive transcranial magnetic stimulation for negative symptoms of schizophrenia: a randomized controlled pilot study. *Schizophr Res*. 2007;93(1-3):221-228. 10.1016/j.schres.2007.03.016
119. Prikryl R, Kasperek T, Skotakova S, Ustohal L, Kucerova H, Ceskova E. Treatment of negative symptoms of schizophrenia using repetitive transcranial magnetic stimulation in a double-blind, randomized controlled study. *Schizophr Res*. 2007;95(1-3):151-157. 10.1016/j.schres.2007.06.019
120. Rosa MO, Gattaz WF, Rosa MA, et al. Effects of repetitive transcranial magnetic stimulation on auditory hallucinations refractory to clozapine. *The Journal of clinical psychiatry*. 2007;68(10):1528-1532. 10.4088/jcp.v68n1009
121. Novak T, Horacek J, Mohr P, et al. The double-blind sham-controlled study of high-frequency rTMS (20 Hz) for negative symptoms in schizophrenia: negative results. *Neuro endocrinology letters*. 2006;27(1-2):209-213.
122. Saba G, Verdon CM, Kalalou K, et al. Transcranial magnetic stimulation in the treatment of schizophrenic symptoms: a double blind sham controlled study. *Journal of psychiatric research*. 2006;40(2):147-152. 10.1016/j.jpsychires.2005.02.008
123. Hajak G, Marienhagen J, Langguth B, Werner S, Binder H, Eichhammer P. High-frequency repetitive transcranial magnetic stimulation in schizophrenia: a combined treatment and neuroimaging study. *Psychological medicine*. 2004;34(7):1157-1163. 10.1017/s0033291704002338

124. Holi MM, Eronen M, Toivonen K, Toivonen P, Marttunen M, Naukkarinen H. Left prefrontal repetitive transcranial magnetic stimulation in schizophrenia. *Schizophr Bull.* 2004;30(2):429-434. 10.1093/oxfordjournals.schbul.a007089
125. Klein E, Kolsky Y, Puyarovsky M, Koren D, Chistyakov A, Feinsod M. Right prefrontal slow repetitive transcranial magnetic stimulation in schizophrenia: a double-blind sham-controlled pilot study. *Biological psychiatry.* 1999;46(10):1451-1454. 10.1016/s0006-3223(99)00182-1

| Sham        | Study name                   | Statistics for each study |              |              |              | Relative weight |
|-------------|------------------------------|---------------------------|--------------|--------------|--------------|-----------------|
|             |                              | Std diff in means         | Lower limit  | Upper limit  | p value      |                 |
| rTMS        | Barr, M.S. (2012)            | 0.139                     | -0.429       | 0.708        | 0.631        | 2.83            |
| rTMS        | Basavaraju, R. (2021)        | 0.854                     | 0.405        | 1.303        | 0.000        | 3.31            |
| rTMS        | Bation, R. (2021)            | 0.325                     | -0.311       | 0.961        | 0.317        | 2.58            |
| rTMS        | Chauhan, P. (2021)           | 1.507                     | 0.812        | 2.201        | 0.000        | 2.38            |
| rTMS        | Dlabac-de Lange, J.J. (2015) | 0.199                     | -0.296       | 0.694        | 0.431        | 3.12            |
| rTMS        | Fitzgerald, P.B. (2008)      | 0.117                     | -0.579       | 0.812        | 0.742        | 2.38            |
| rTMS        | Gan, J. (2015)               | 0.167                     | -0.167       | 0.500        | 0.327        | 3.78            |
| rTMS        | Garg, S. (2016)              | 0.211                     | -0.233       | 0.654        | 0.352        | 3.33            |
| rTMS        | Guán, H.Y. (2020)            | 0.871                     | 0.356        | 1.385        | 0.001        | 3.04            |
| rTMS        | Hajak, G. (2004)             | -0.453                    | -1.104       | 0.198        | 0.172        | 2.53            |
| rTMS        | Hasan, A. (2017)             | 0.681                     | 0.332        | 1.029        | 0.000        | 3.72            |
| rTMS        | Holi, M.M. (2004)            | 0.817                     | 0.134        | 1.499        | 0.019        | 2.42            |
| rTMS        | Klein, E. (1999)             | -0.280                    | -0.796       | 0.236        | 0.287        | 3.04            |
| rTMS        | Kumar, N. (2020)             | 1.072                     | 0.725        | 1.420        | 0.000        | 3.72            |
| rTMS        | Li, Z. (2016)                | 0.250                     | -0.175       | 0.674        | 0.249        | 3.41            |
| rTMS        | Mogg, A. (2007)              | 0.389                     | -0.288       | 1.067        | 0.260        | 2.44            |
| rTMS        | Novak, T. (2006)             | 0.524                     | -0.215       | 1.263        | 0.164        | 2.24            |
| rTMS        | Pan, Z. (2021)               | 0.127                     | -0.325       | 0.578        | 0.583        | 3.30            |
| rTMS        | Prikryl, R. (2007)           | 0.281                     | -0.321       | 0.884        | 0.360        | 2.70            |
| rTMS        | Prikryl, R. (2012)           | 0.177                     | -0.419       | 0.772        | 0.561        | 2.73            |
| rTMS        | Prikryl, R. (2013)           | 0.318                     | -0.169       | 0.805        | 0.201        | 3.15            |
| rTMS        | Quan, W.X. (2015)            | 0.641                     | 0.297        | 0.986        | 0.000        | 3.74            |
| rTMS        | Rabany, L. (2014)            | 0.134                     | -0.489       | 0.756        | 0.674        | 2.63            |
| rTMS        | Ray, P. (2015)               | 2.387                     | 1.527        | 3.246        | 0.000        | 1.90            |
| rTMS        | Rosa, M.O. (2007)            | 1.274                     | 0.094        | 2.453        | 0.034        | 1.25            |
| rTMS        | Rosenberg, O. (2012)         | -0.103                    | -0.759       | 0.552        | 0.757        | 2.52            |
| rTMS        | Saba, G. (2006)              | 1.066                     | 0.198        | 1.933        | 0.016        | 1.88            |
| rTMS        | Singh, S. (2020)             | 1.028                     | 0.403        | 1.654        | 0.001        | 2.62            |
| rTMS        | Wobrock, T. (2015)           | 0.472                     | 0.214        | 0.730        | 0.000        | 4.07            |
| rTMS        | Xiu, M.H. (2020)             | 1.025                     | 0.643        | 1.408        | 0.000        | 3.58            |
| rTMS        | Zhao, S. (2014)              | 0.071                     | -0.347       | 0.490        | 0.738        | 3.43            |
| rTMS        | Zheng, L.N. (2012)           | 0.038                     | -0.438       | 0.513        | 0.877        | 3.20            |
| rTMS        | Zhu, L. (2021)               | 0.086                     | -0.285       | 0.457        | 0.648        | 3.63            |
| rTMS        | Zhuo, K. (2019)              | 0.739                     | 0.313        | 1.164        | 0.001        | 3.40            |
| <b>rTMS</b> | <b>Overall rTMS</b>          | <b>0.468</b>              | <b>0.313</b> | <b>0.622</b> | <b>0.000</b> | <b>100.00</b>   |
| tDCS        | Brunelin, J. (2012)          | -0.310                    | -0.828       | 0.208        | 0.241        | 8.32            |
| tDCS        | Chang, C.C. (2019)           | 0.097                     | -0.261       | 0.456        | 0.595        | 10.69           |
| tDCS        | Chang, C.C. (2020)           | 0.384                     | 0.013        | 0.754        | 0.043        | 10.50           |
| tDCS        | Chang, C.C. (2021)           | 0.673                     | 0.162        | 1.185        | 0.010        | 8.41            |
| tDCS        | Dharani, R. (2021)           | 0.029                     | -0.712       | 0.770        | 0.939        | 5.76            |
| tDCS        | Frohlich, F. (2016)          | -0.024                    | -0.567       | 0.520        | 0.932        | 7.98            |
| tDCS        | Gomes, J.S. (2018)           | 0.032                     | -0.559       | 0.623        | 0.915        | 7.37            |
| tDCS        | Jeon, D.W. (2018)            | 0.296                     | -0.089       | 0.682        | 0.132        | 10.28           |
| tDCS        | Mellin, J.M. (2018)          | 0.803                     | -0.049       | 1.654        | 0.065        | 4.82            |
| tDCS        | Mondino, M. (2016)           | -0.077                    | -0.644       | 0.489        | 0.789        | 7.68            |
| tDCS        | Palm, U. (2016)              | 0.033                     | -0.587       | 0.653        | 0.916        | 7.03            |
| tDCS        | Valiengo, L.D.C.L. (2020)    | 0.909                     | 0.580        | 1.239        | 0.000        | 11.15           |
| <b>tDCS</b> | <b>Overall tDCS</b>          | <b>0.251</b>              | <b>0.022</b> | <b>0.480</b> | <b>0.032</b> | <b>100.00</b>   |

Interaction test p value = 0.124

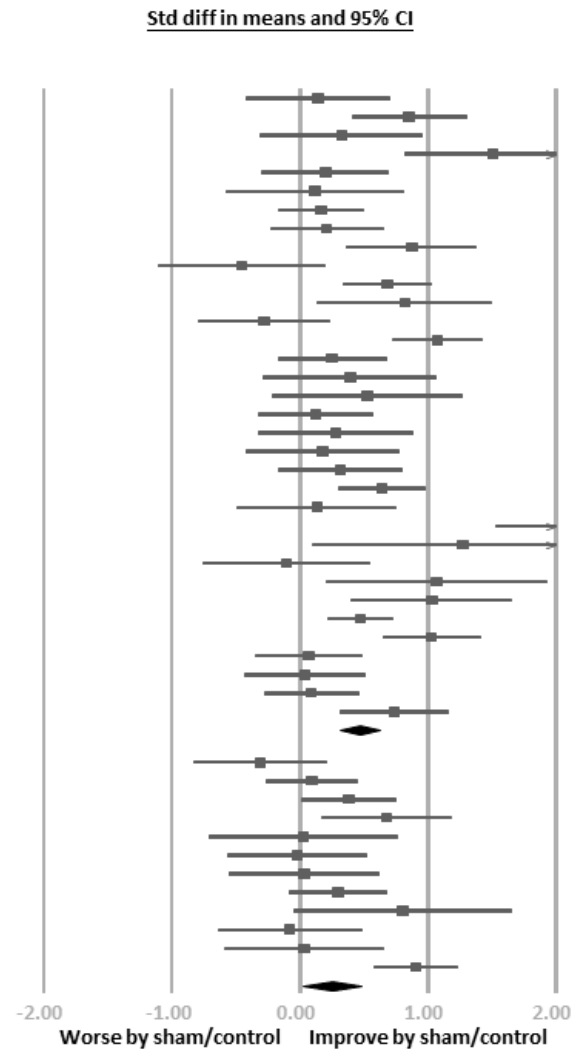

eFigure 1 Test for transitivity assumption: Changes in negative symptoms



## Figure legend of eFigure 1

Abbreviation: 95% CI: 95% confidence interval; rTMS: repetitive transcranial magnetic stimulation; Std diff in means: standardized difference in means; ; tDCS: transcranial direct current stimulation

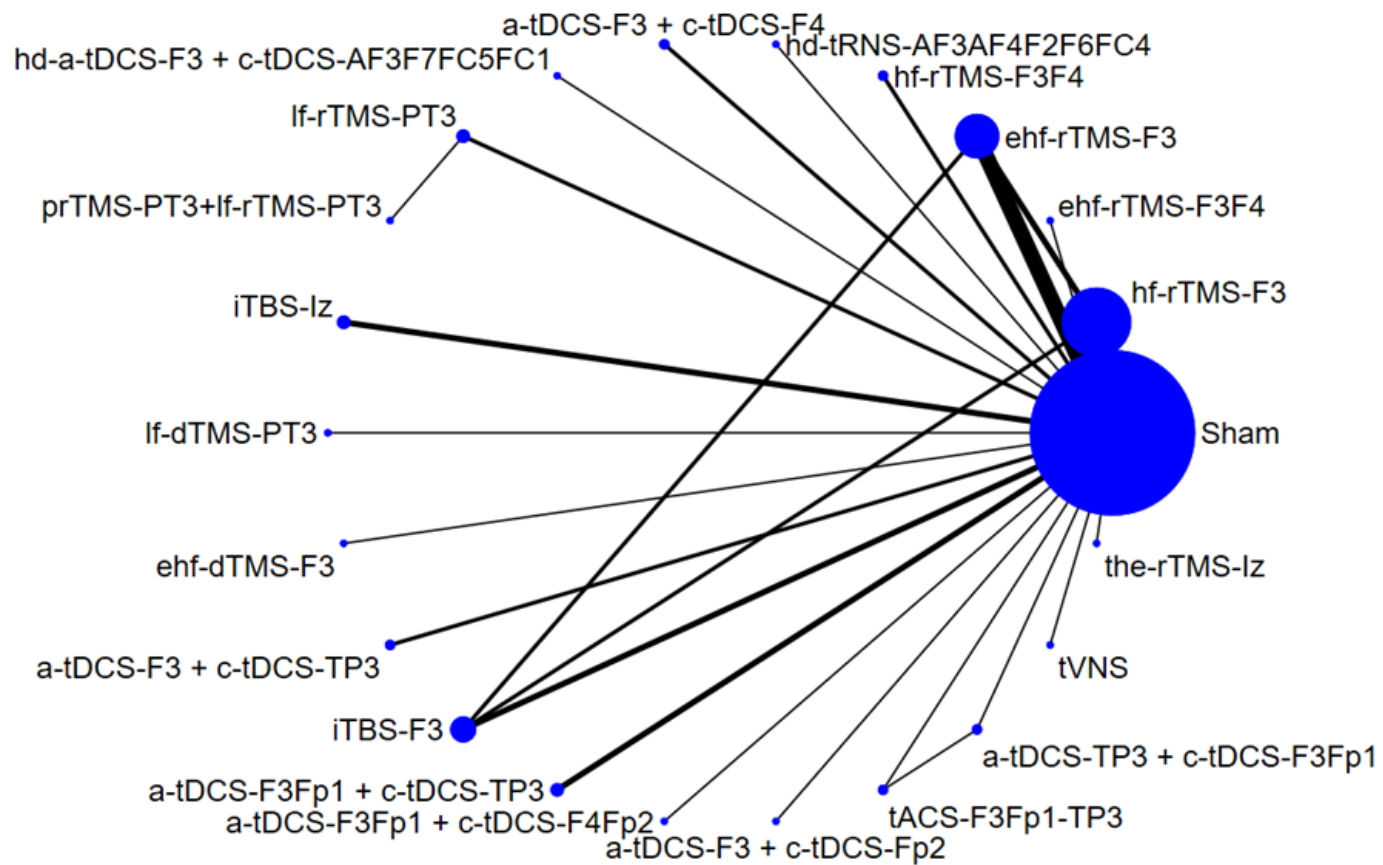

**eFigure 2A network structure of primary outcome: negative symptoms: subgroup of definite Dx criteria** <sup>126</sup>

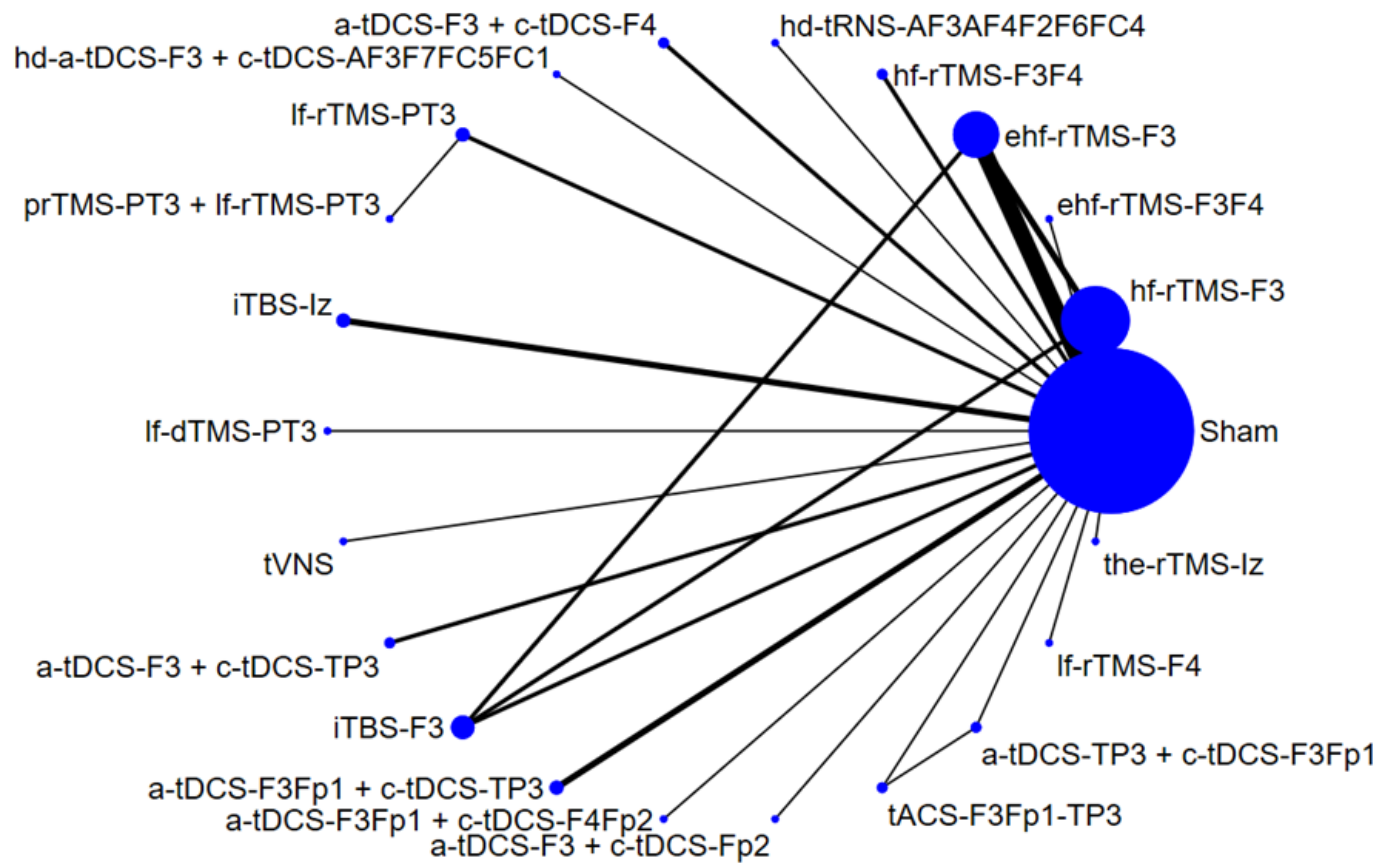

**eFigure 2B network structure of secondary outcome: positive symptoms**

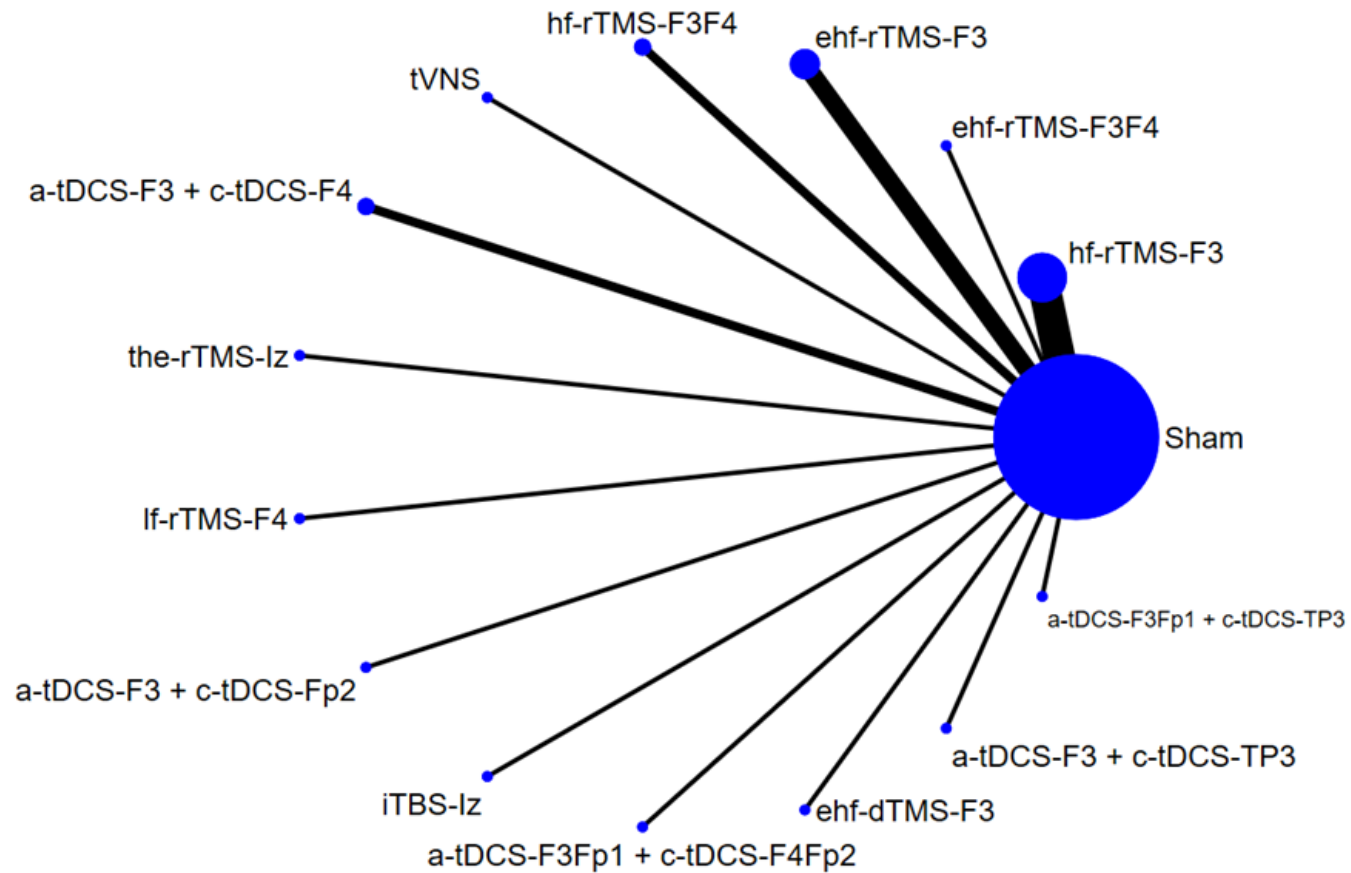

**eFigure 2C network structure of secondary outcome: depressive symptoms**

## Figure legend of eFigure 2A-2C

Lines between nodes represent direct comparisons between trials, and circle size is proportional to the size of the population that received each treatment. Line thickness is proportional to the number of trials connected to the network.

Abbreviation: 95%CI: 95% confidence interval; a-tDCS-F3 + c-tDCS-F4: 2 mA Anode tDCS at F3, cathode at F4; a-tDCS-F3 + c-tDCS-Fp2: 2 mA Anode tDCS at F3, cathode at Fp2; a-tDCS-F3 + c-tDCS-TP3: 2 mA Anode tDCS at F3, cathode at TP3 (left TPJ); a-tDCS-F3Fp1 + c-tDCS-F4Fp2: 2 mA Anode tDCS at F3Fp1, cathode at F4Fp2; a-tDCS-F3Fp1 + c-tDCS-TP3: 2 mA Anode tDCS at F3Fp1, cathode at T3P3 (left TPJ); a-tDCS-TP3 + c-tDCS-F3Fp1: 2 mA Cathode tDCS at F3Fp1, anode at T3P3 (left TPJ); DLPFC: dorsolateral prefrontal cortex; ehf-dTMS-F3: 20 Hz deep rTMS at left DLPFC (F3); ehf-rTMS-F3: extreme hf (20Hz) rTMS at left DLPFC (F3); ehf-rTMS-F3F4: extreme hf (20Hz) rTMS at left DLPFC (F3) and right DLPFC (F4); hd-a-tDCS-F3 + c-tDCS-AF3F7FC5FC1: High definition 2 mA Anode tDCS at F3, cathode at AF3, F7, FC5, and FC1; hd-tRNS-AF3AF4F2F6FC4: High definition 2 mA Anode tRNS at AF3, cathode at AF4, F2, F6, and FC4; hf-rTMS-F3: hf (10Hz) rTMS at left DLPFC (F3); hf-rTMS-F3F4: hf (10Hz) rTMS at left PFC (F3) and right PFC (F4); iTBS: intermittent theta-burst stimulation; iTBS-F3: iTBS at left DLPFC (F3); iTBS-lz : iTBS at lz (vermal part of cerebellum); lf-dTMS-PT3: 1 Hz deep rTMS at PT3 (left temporo-parietal cortex); lf-rTMS-F4: 1 Hz rTMS at right PFC (F4); lf-rTMS-PT3: 1 Hz rTMS at PT3 (left temporo-parietal cortex); MRI: magnetic resonance imaging; NIBS: noninvasive brain stimulation; NMA: network meta-analysis; OR: odds ratio; PRISMA: Preferred Reporting Items for Systematic Reviews and Meta-Analyses; prTMS-PT3 + lf-rTMS-PT3: 6 Hz priming rTMS at PT3 (left temporo-parietal cortex) + 1 Hz rTMS at PT3; RCT: randomized controlled trial; rTMS: repetitive transcranial magnetic stimulation; SMD: standardized mean difference; SUCRA: surface under the cumulative ranking curve; tACS-F3Fp1-TP3: 2 mA 10Hz tACS at F3Fp1 to T3P3 (TPJ); TBS: theta-burst stimulation; tDCS: transcranial direct current stimulation; the-rTMS-lz : Theta-range rTMS at lz (vermal part of cerebellum); tRNS: transcranial random noise stimulation; tVNS: transcutaneous vagal nerve stimulation; tVNS: tVNS at left auricle; vmPFC: ventromedial prefrontal cortex; VTA: ventral tegmental area

# Negative symptoms: subgroup with definite diagnostic criteria

Reference treatment: Sham

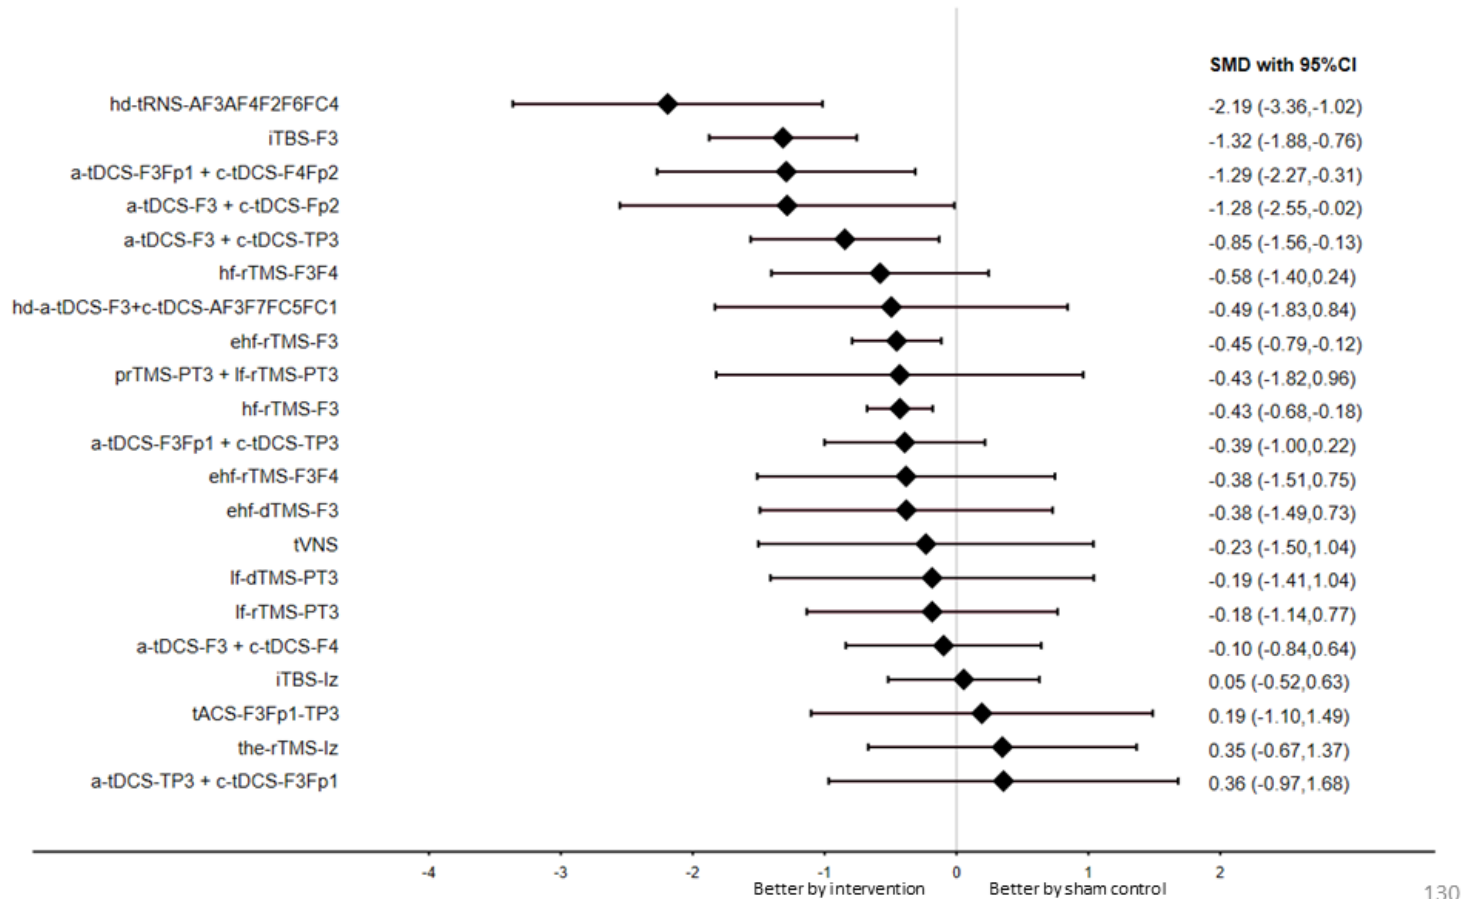

**eFigure 3A forest plot of primary outcome: negative symptoms: subgroup of definite Dx criteria**

# Positive symptoms

Reference treatment: Sham

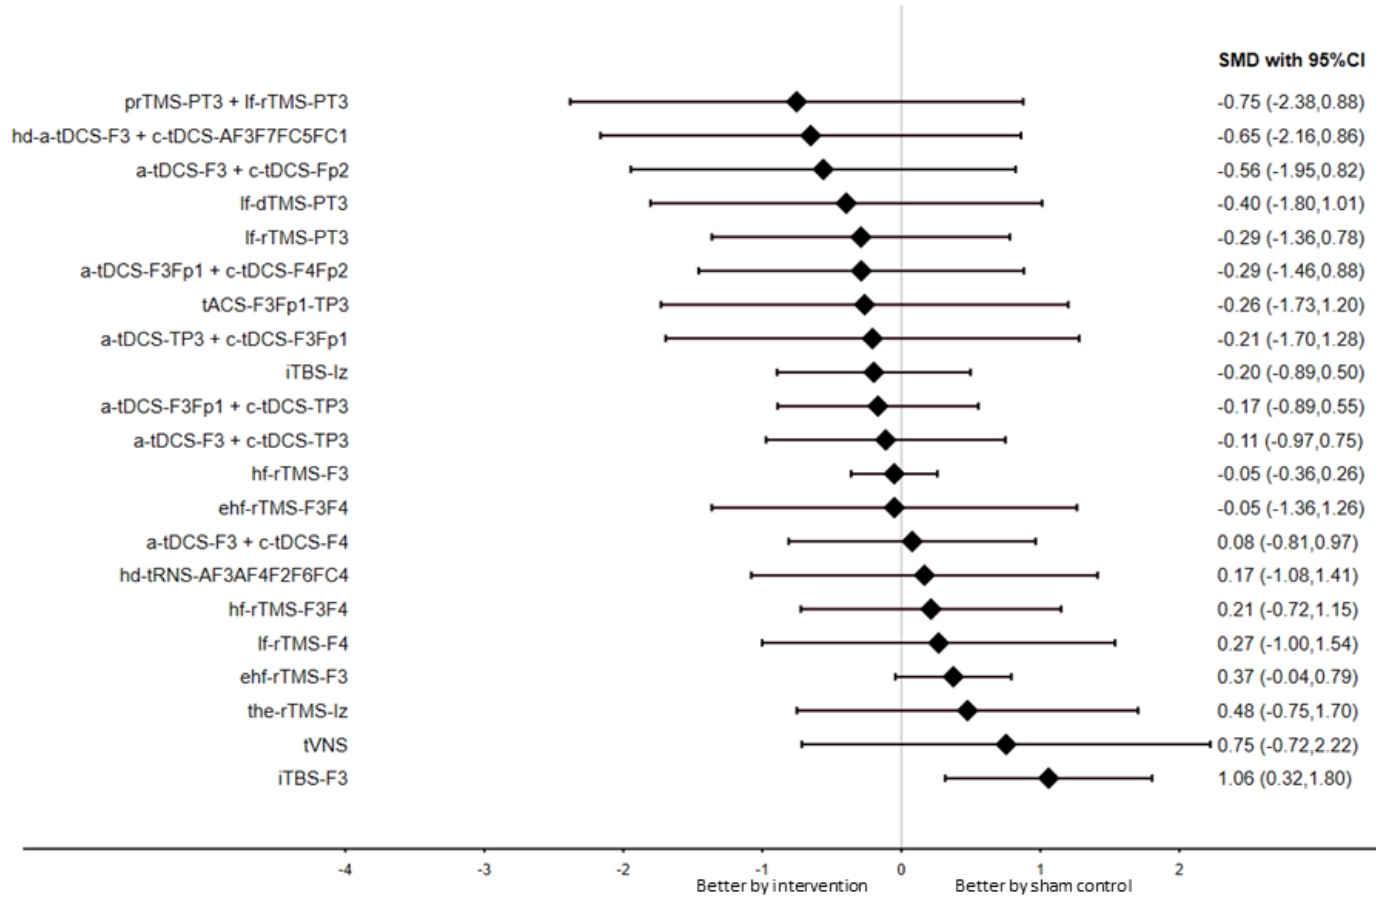

eFigure 3B forest plot of secondary outcome: positive symptoms

## Depressive symptoms

Reference treatment: Sham

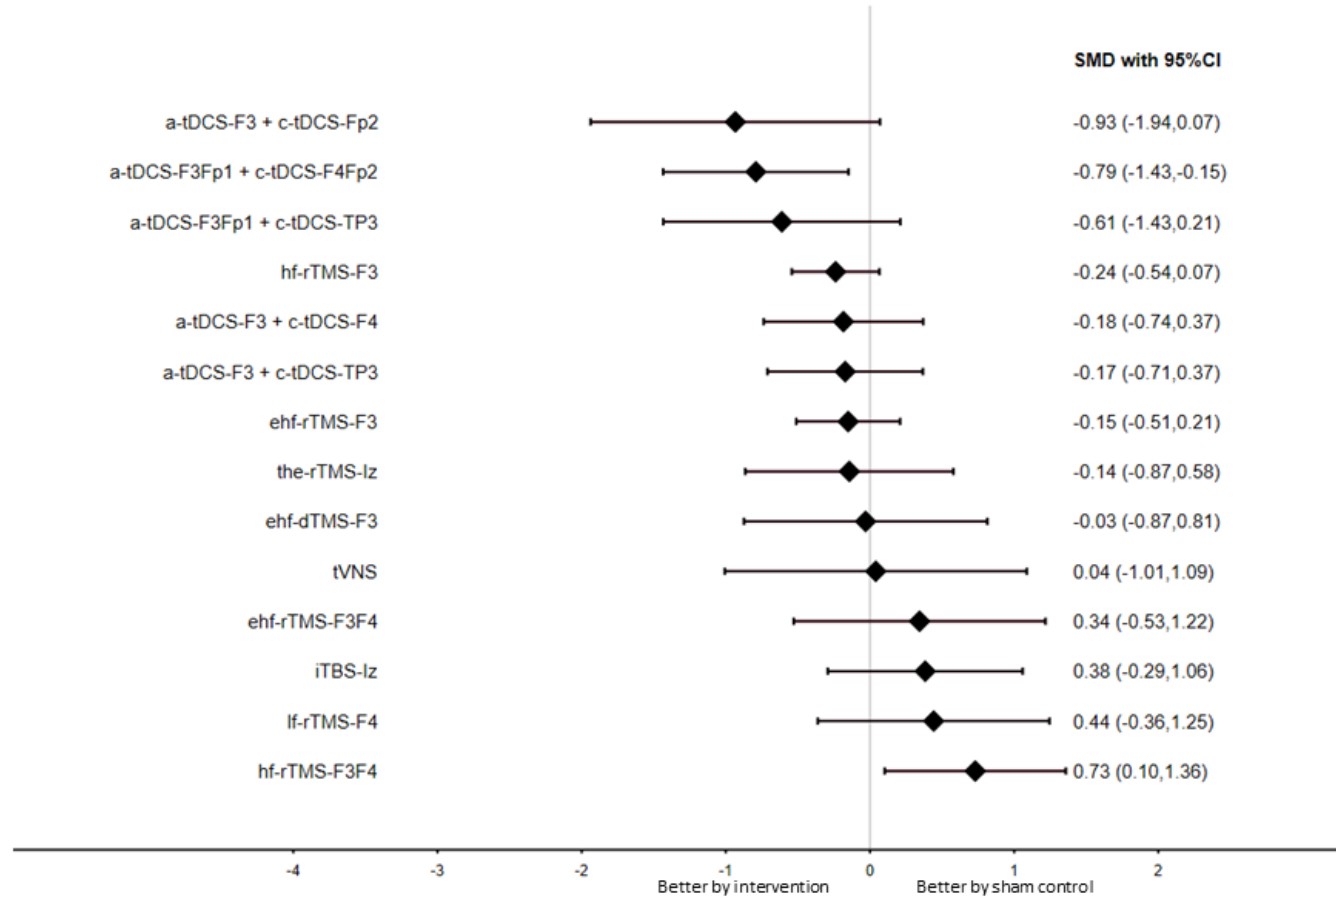

eFigure 3C forest plot of secondary outcome: depressive symptoms



## Figure legend of eFigure 3A-3C

Abbreviation: 95%CI: 95% confidence interval; a-tDCS-F3 + c-tDCS-F4: 2 mA Anode tDCS at F3, cathode at F4; a-tDCS-F3 + c-tDCS-Fp2: 2 mA Anode tDCS at F3, cathode at Fp2; a-tDCS-F3 + c-tDCS-TP3: 2 mA Anode tDCS at F3, cathode at TP3 (left TPJ); a-tDCS-F3Fp1 + c-tDCS-F4Fp2: 2 mA Anode tDCS at F3Fp1, cathode at F4Fp2; a-tDCS-F3Fp1 + c-tDCS-TP3: 2 mA Anode tDCS at F3Fp1, cathode at T3P3 (left TPJ); a-tDCS-TP3 + c-tDCS-F3Fp1: 2 mA Cathode tDCS at F3Fp1, anode at T3P3 (left TPJ); DLPFC: dorsolateral prefrontal cortex; ehf-dTMS-F3: 20 Hz deep rTMS at left DLPFC (F3); ehf-rTMS-F3: extreme hf (20Hz) rTMS at left DLPFC (F3); ehf-rTMS-F3F4: extreme hf (20Hz) rTMS at left DLPFC (F3) and right DLPFC (F4); hd-a-tDCS-F3 + c-tDCS-AF3F7FC5FC1: High definition 2 mA Anode tDCS at F3, cathode at AF3, F7, FC5, and FC1; hd-tRNS-AF3AF4F2F6FC4: High definition 2 mA Anode tRNS at AF3, cathode at AF4, F2, F6, and FC4; hf-rTMS-F3: hf (10Hz) rTMS at left DLPFC (F3); hf-rTMS-F3F4: hf (10Hz) rTMS at left PFC (F3) and right PFC (F4); iTBS: intermittent theta-burst stimulation; iTBS-F3: iTBS at left DLPFC (F3); iTBS-lz : iTBS at lz (vermal part of cerebellum); lf-dTMS-PT3: 1 Hz deep rTMS at PT3 (left temporo-parietal cortex); lf-rTMS-F4: 1 Hz rTMS at right PFC (F4); lf-rTMS-PT3: 1 Hz rTMS at PT3 (left temporo-parietal cortex); MRI: magnetic resonance imaging; NIBS: noninvasive brain stimulation; NMA: network meta-analysis; OR: odds ratio; PRISMA: Preferred Reporting Items for Systematic Reviews and Meta-Analyses; prTMS-PT3 + lf-rTMS-PT3: 6 Hz priming rTMS at PT3 (left temporo-parietal cortex) + 1 Hz rTMS at PT3; RCT: randomized controlled trial; rTMS: repetitive transcranial magnetic stimulation; SMD: standardized mean difference; SUCRA: surface under the cumulative ranking curve; tACS-F3Fp1-TP3: 2 mA 10Hz tACS at F3Fp1 to T3P3 (TPJ); TBS: theta-burst stimulation; tDCS: transcranial direct current stimulation; the-rTMS-lz : Theta-range rTMS at lz (vermal part of cerebellum); tRNS: transcranial random noise stimulation; tVNS: transcutaneous vagal nerve stimulation; tVNS: tVNS at left auricle; vmPFC: ventromedial prefrontal cortex; VTA: ventral tegmental area

133

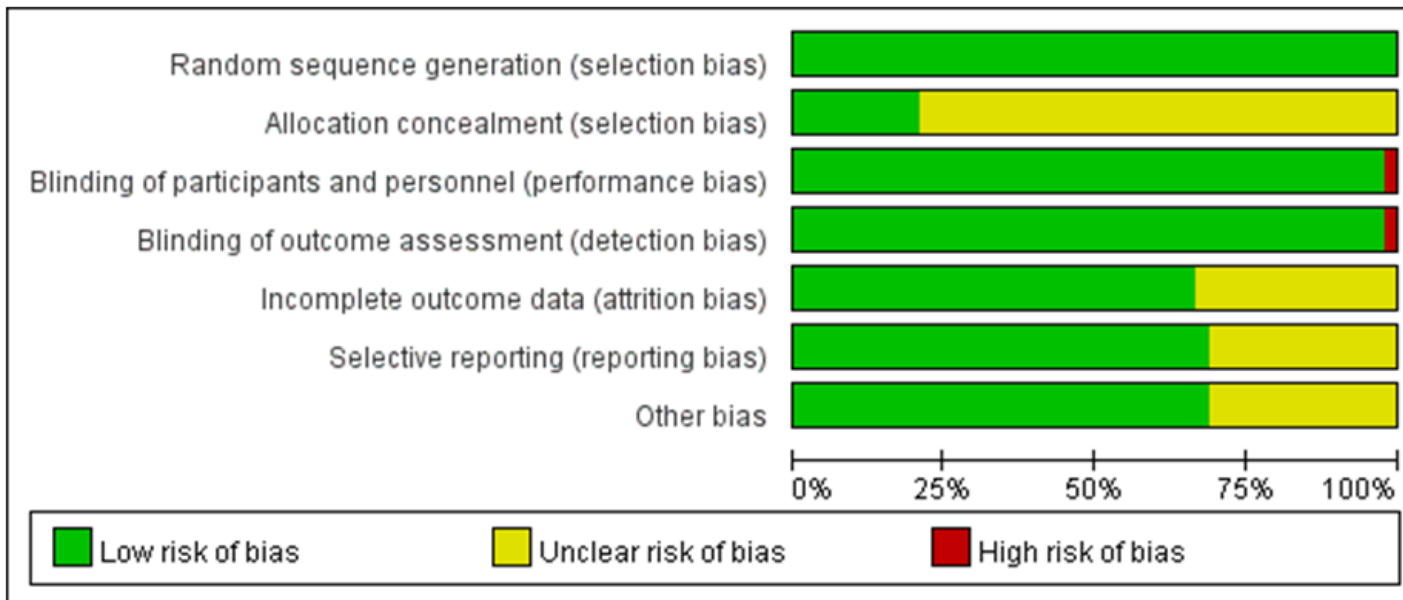

**eFigure 4A overview of risk of bias**



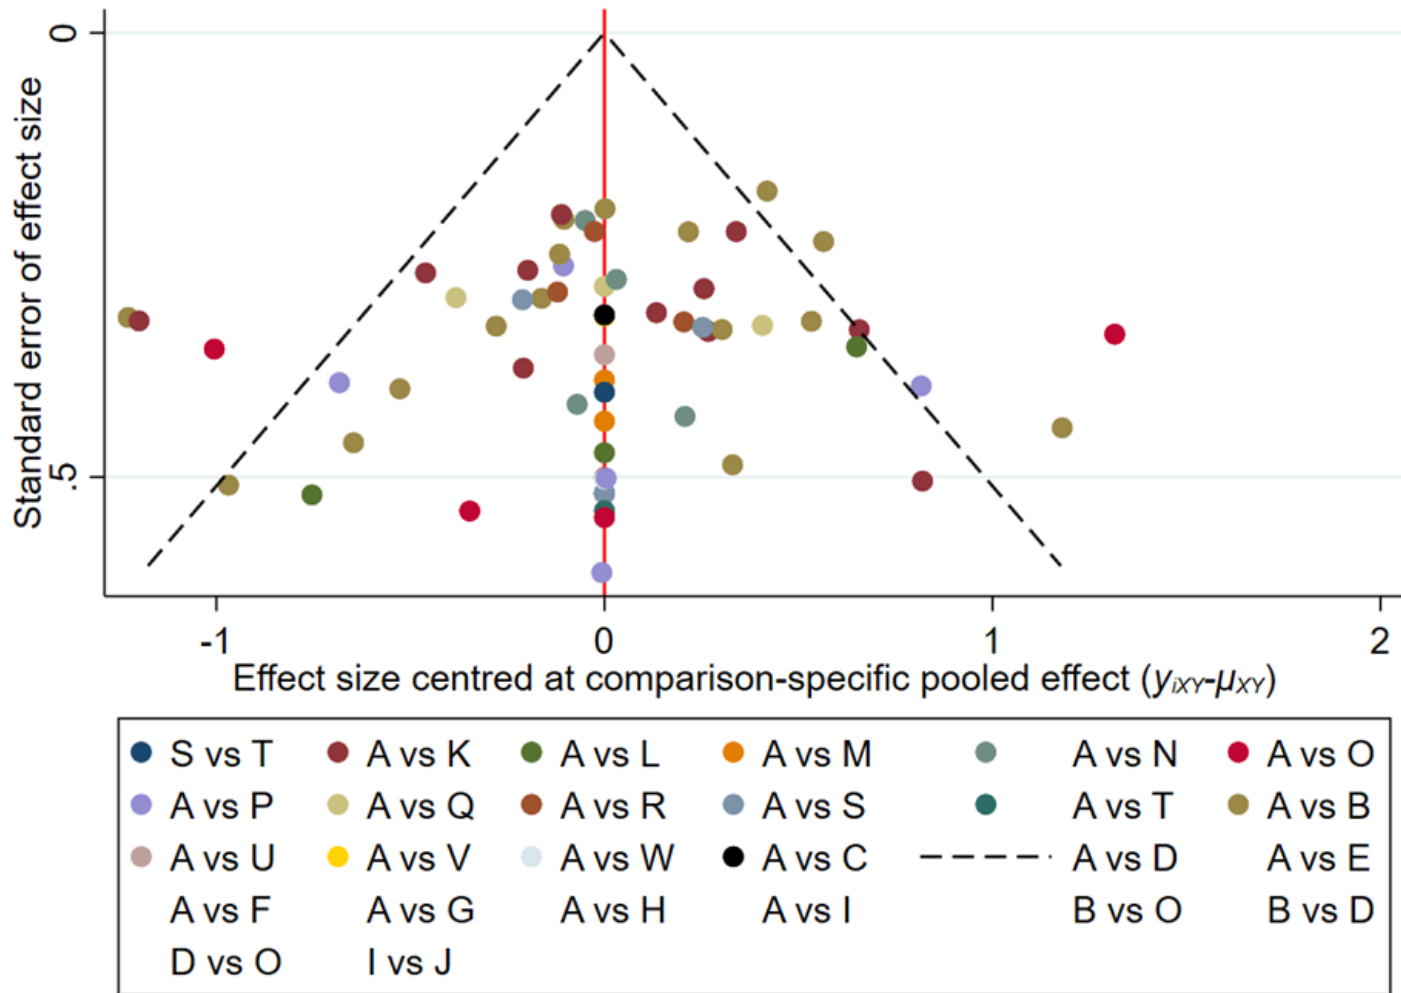

eFigure 5A Funnel plot of primary outcome: negative symptoms

Treatments used in eFigure 5A

- A: Sham
- B: hf (10Hz) rTMS at left DLPFC (F3)
- C: extreme hf (20Hz) rTMS at left DLPFC (F3) and right DLPFC (F4)
- D: extreme hf (20Hz) rTMS at left DLPFC (F3)
- E: hf (10Hz) rTMS at left PFC (F3) and right PFC (F4)
- F: High definition 2 mA Anode tRNS at AF3, cathode at AF4, F2, F6, and FC4
- G: 2 mA Anode tDCS at F3, cathode at F4
- H: High definition 2 mA Anode tDCS at F3, cathode at AF3, F7, FC5, and FC1
- I: 1 Hz rTMS at PT3 (left temporo-parietal cortex)
- J: 6 Hz priming rTMS at PT3 (left temporo-parietal cortex) + 1 Hz rTMS at PT3
- K: iTBS at Iz (vermal part of cerebellum)
- L: 1 Hz deep rTMS at PT3 (left temporo-parietal cortex)
- M: 20 Hz deep rTMS at left DLPFC (F3)
- N: 2 mA Anode tDCS at F3, cathode at TP3 (left TPJ)
- O: iTBS at left DLPFC (F3)
- P: 2 mA Anode tDCS at F3Fp1, cathode at T3P3 (left TPJ)
- Q: 2 mA Anode tDCS at F3Fp1, cathode at F4Fp2
- R: 2 mA Anode tDCS at F3, cathode at Fp2
- S: 2 mA 10Hz tACS at F3Fp1 to T3P3 (TPJ)
- T: 2 mA Cathode tDCS at F3Fp1, anode at T3P3 (left TPJ)
- U: 1 Hz rTMS at right PFC (F4)
- V: Theta-range rTMS at Iz (vermal part of cerebellum)
- W: tvNS at left auricle

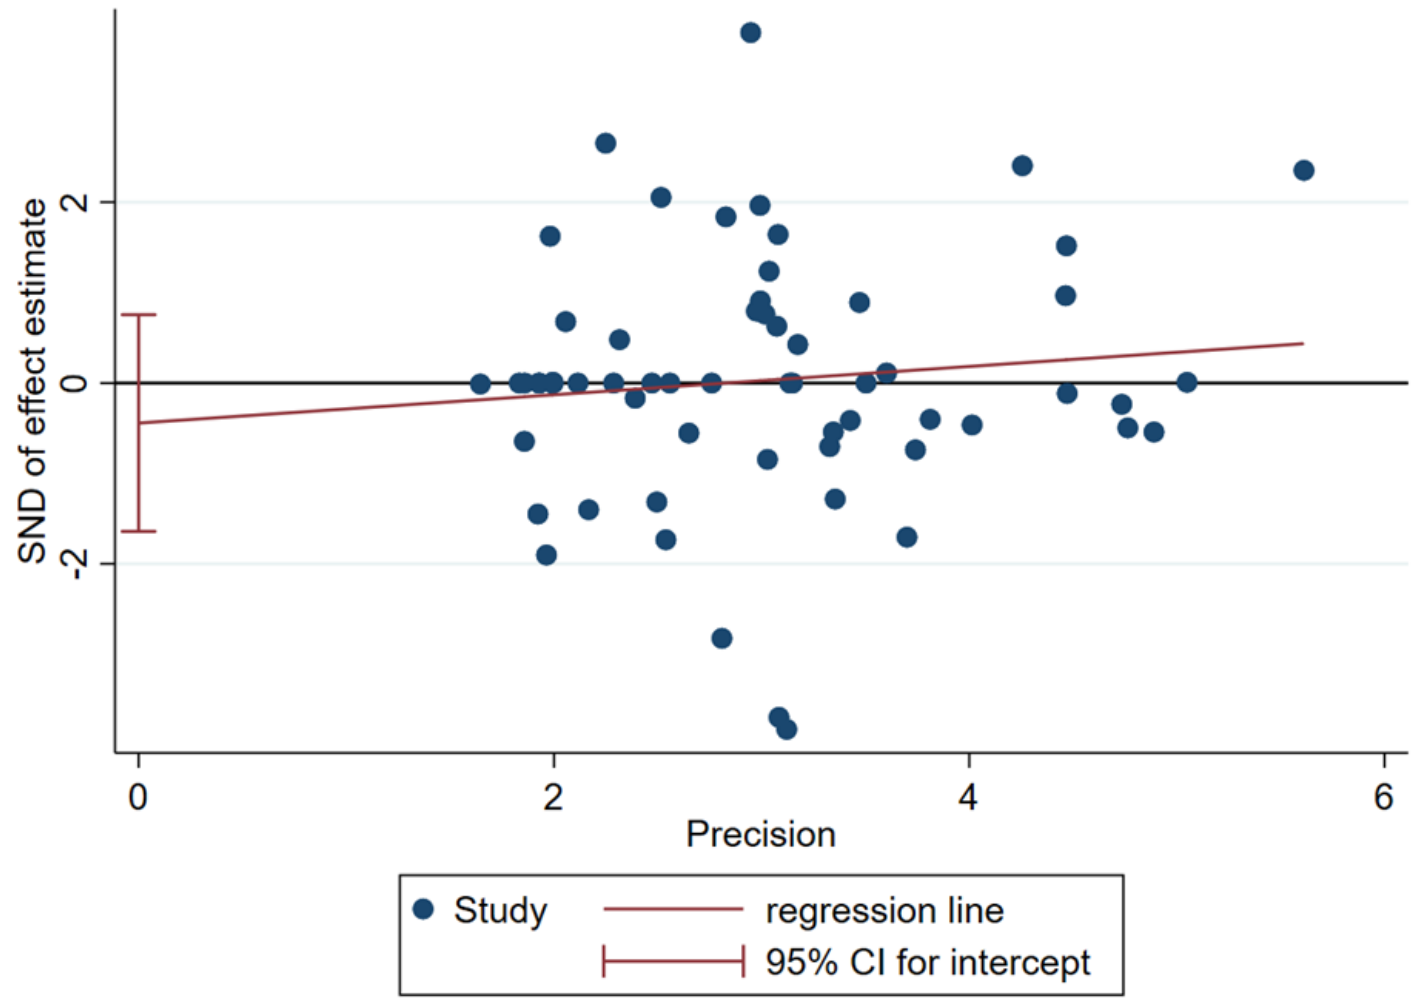

**eFigure 5B Egger's regression of primary outcome: negative symptoms**

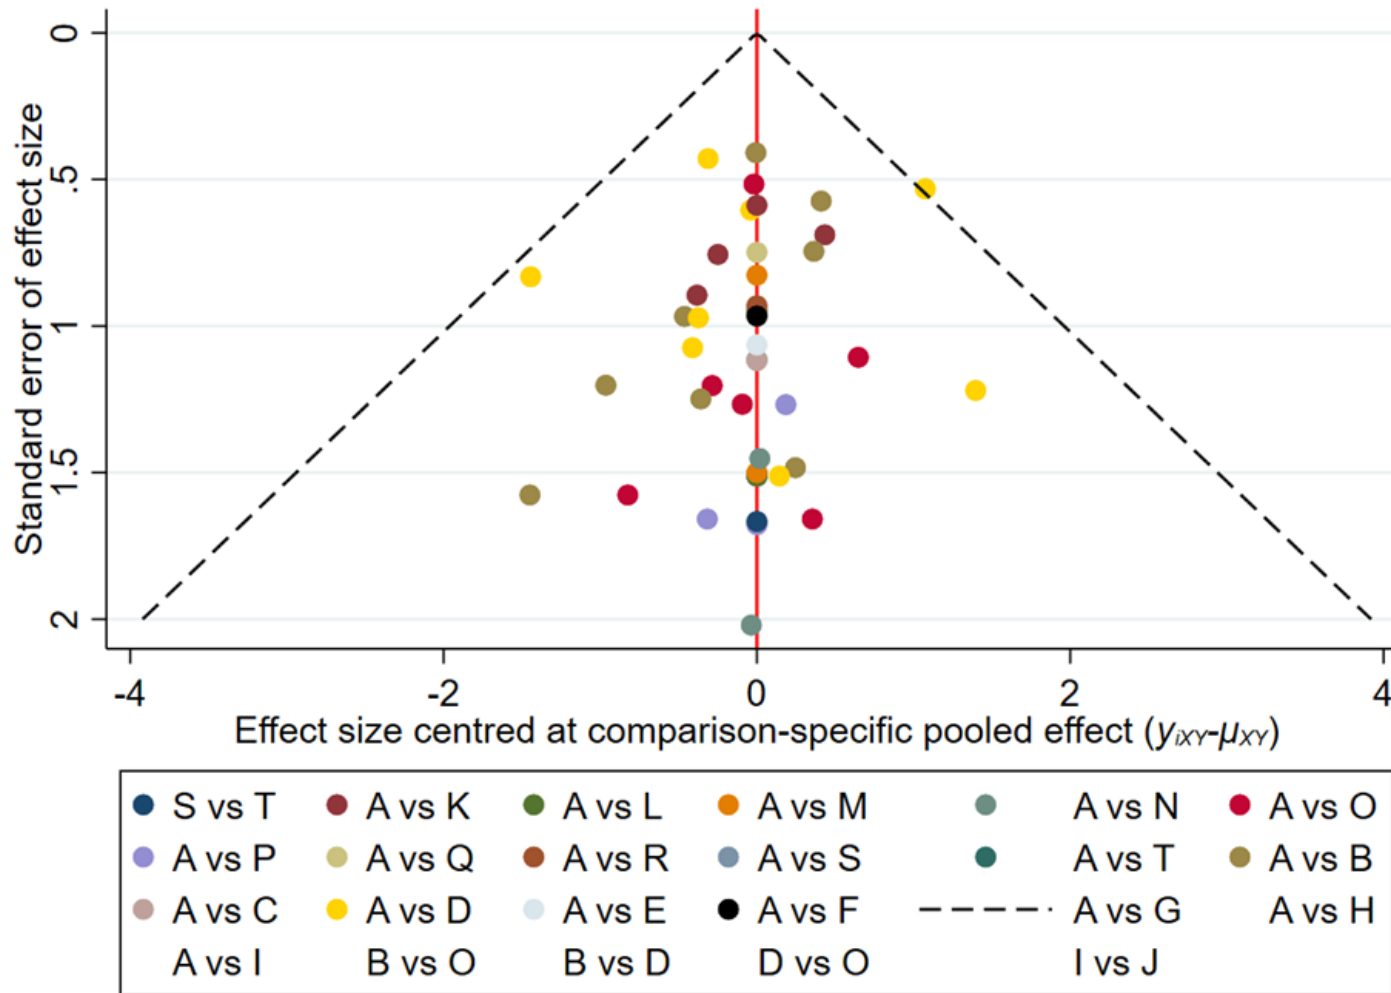

eFigure 5C Funnel plot of acceptability: drop-out rate

Treatments used in eFigure 5C

- A: Sham
- B: hf (10Hz) rTMS at left DLPFC (F3)
- C: tVNS at left auricle
- D: extreme hf (20Hz) rTMS at left DLPFC (F3)
- E: hf (10Hz) rTMS at left PFC (F3) and right PFC (F4)
- F: High definition 2 mA Anode tRNS at AF3, cathode at AF4, F2, F6, and FC4
- G: 2 mA Anode tDCS at F3, cathode at F4
- H: High definition 2 mA Anode tDCS at F3, cathode at AF3, F7, FC5, and FC1
- I: 1 Hz rTMS at PT3 (left temporo-parietal cortex)
- J: 6 Hz priming rTMS at PT3 (left temporo-parietal cortex) + 1 Hz rTMS at PT3
- K: iTBS at Iz (vermal part of cerebellum)
- L: 1 Hz deep rTMS at PT3 (left temporo-parietal cortex)
- M: Theta-range rTMS at Iz (vermal part of cerebellum)
- N: 2 mA Anode tDCS at F3, cathode at TP3 (left TPJ)
- O: iTBS at left DLPFC (F3)
- P: 2 mA Anode tDCS at F3Fp1, cathode at T3P3 (left TPJ)
- Q: 1 Hz rTMS at right PFC (F4)
- R: 2 mA Anode tDCS at F3, cathode at Fp2
- S: 2 mA 10Hz tACS at F3Fp1 to T3P3 (TPJ)
- T: 2 mA Cathode tDCS at F3Fp1, anode at T3P3 (left TPJ)



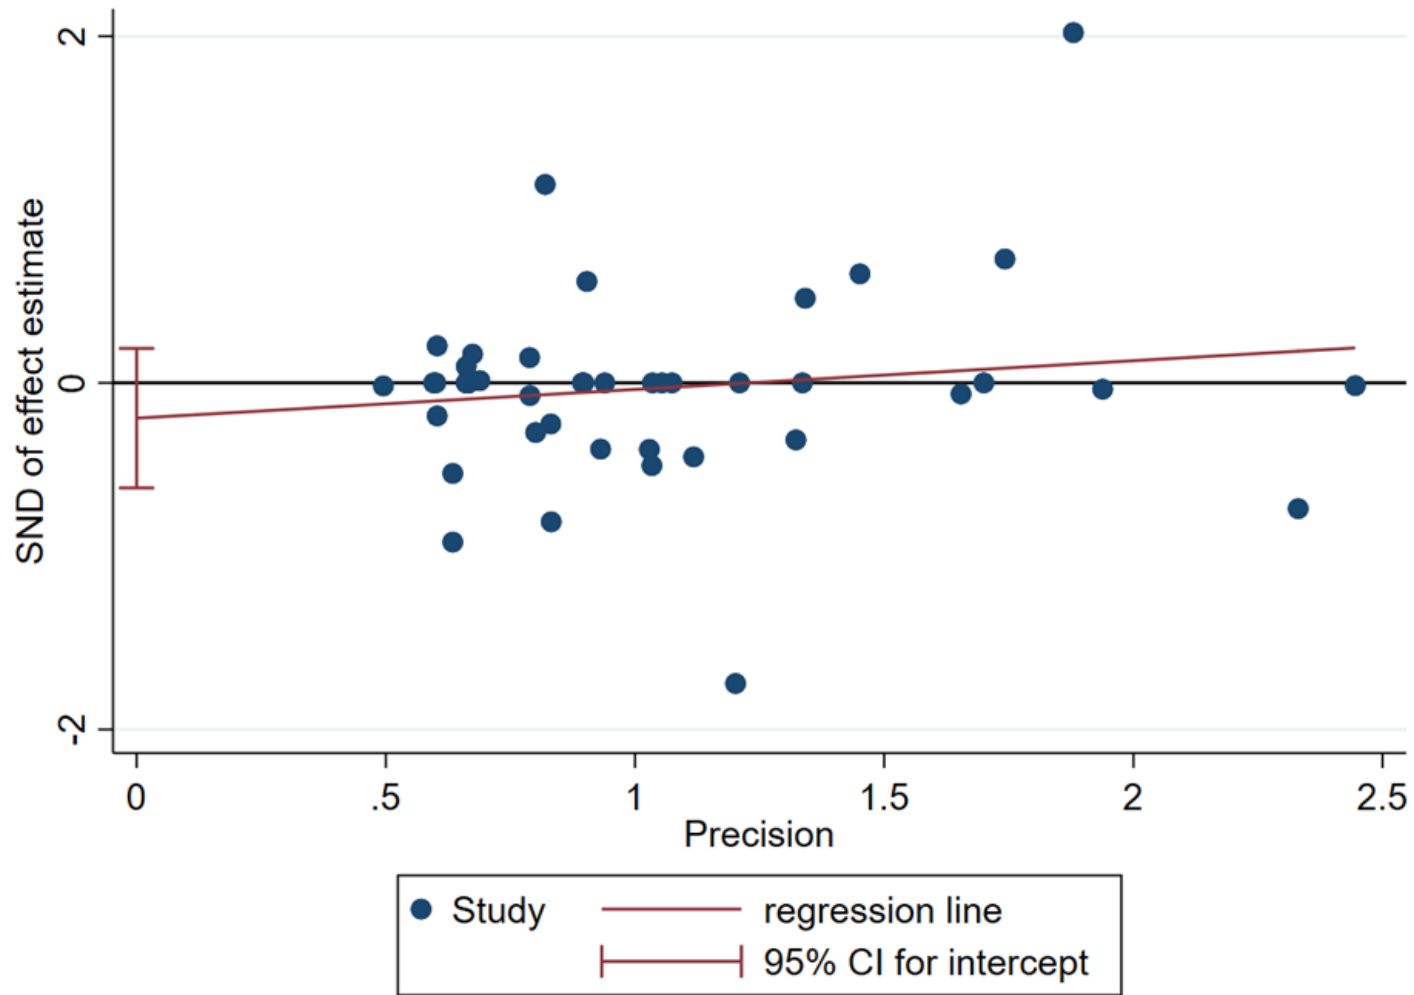

eFigure 5D Egger's regression of acceptability: drop-out rate

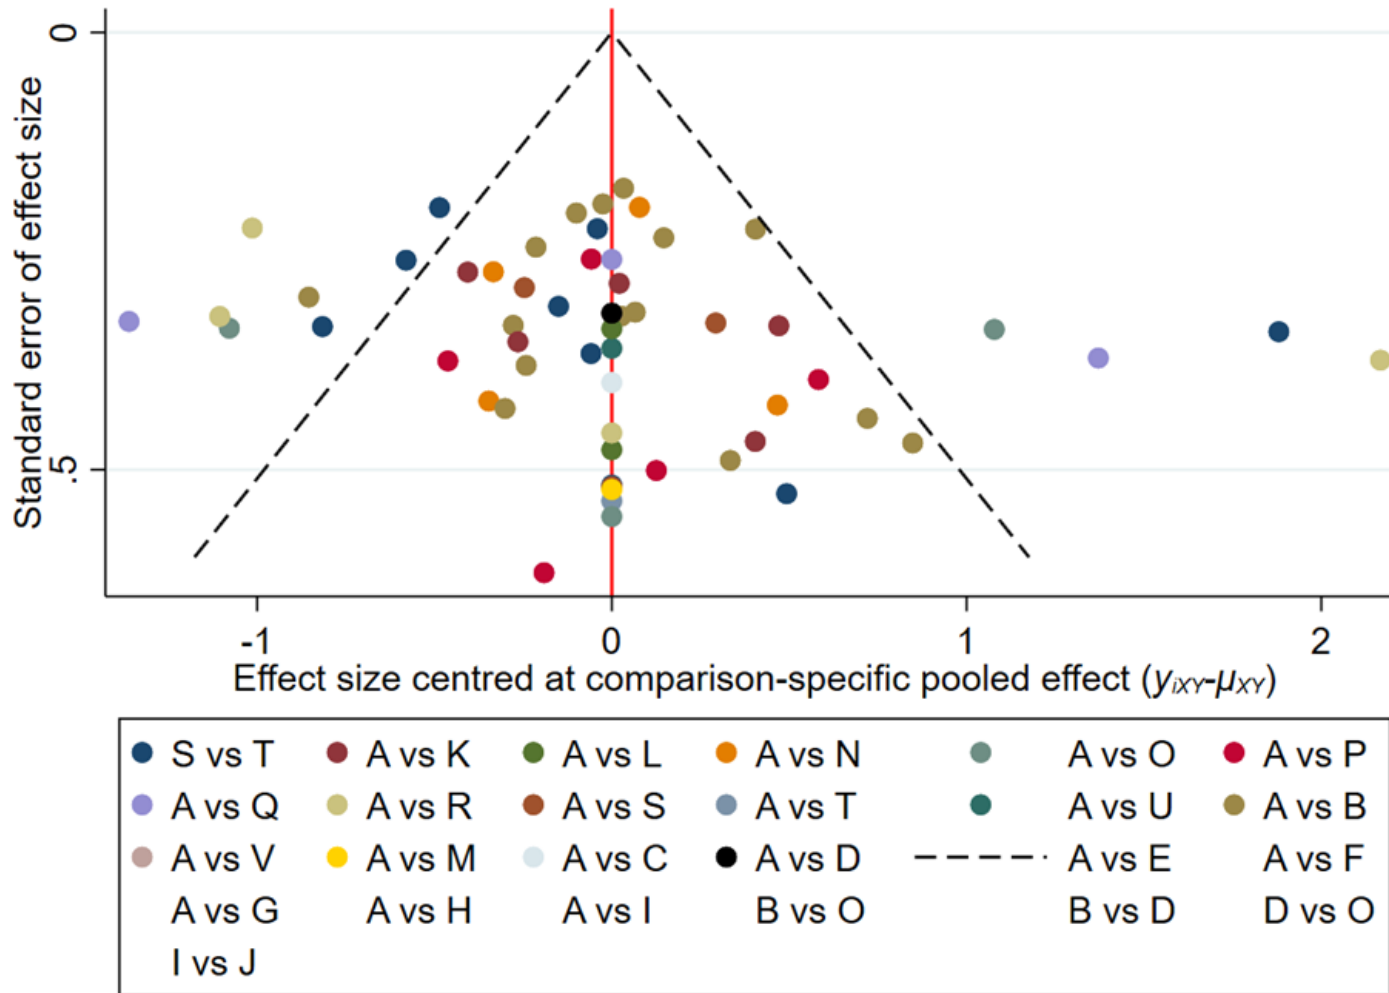

eFigure 5E Funnel plot of secondary outcome: positive symptoms

Treatments used in eFigure 5E

- A: Sham
- B: hf (10Hz) rTMS at left DLPFC (F3)
- C: extreme hf (20Hz) rTMS at left DLPFC (F3) and right DLPFC (F4)
- D: extreme hf (20Hz) rTMS at left DLPFC (F3)
- E: hf (10Hz) rTMS at left PFC (F3) and right PFC (F4)
- F: High definition 2 mA Anode tRNS at AF3, cathode at AF4, F2, F6, and FC4
- G: 2 mA Anode tDCS at F3, cathode at F4
- H: High definition 2 mA Anode tDCS at F3, cathode at AF3, F7, FC5, and FC1
- I: 1 Hz rTMS at PT3 (left temporo-parietal cortex)
- J: 6 Hz priming rTMS at PT3 (left temporo-parietal cortex) + 1 Hz rTMS at PT3
- K: iTBS at Iz (vermal part of cerebellum)
- L: 1 Hz deep rTMS at PT3 (left temporo-parietal cortex)
- M: tVNS at left auricle
- N: 2 mA Anode tDCS at F3, cathode at TP3 (left TPJ)
- O: iTBS at left DLPFC (F3)
- P: 2 mA Anode tDCS at F3Fp1, cathode at T3P3 (left TPJ)
- Q: 2 mA Anode tDCS at F3Fp1, cathode at F4Fp2
- R: 2 mA Anode tDCS at F3, cathode at Fp2
- S: 2 mA 10Hz tACS at F3Fp1 to T3P3 (TPJ)
- T: 2 mA Cathode tDCS at F3Fp1, anode at T3P3 (left TPJ)
- U: 1 Hz rTMS at right PFC (F4)
- V: Theta-range rTMS at Iz (vermal part of cerebellum)

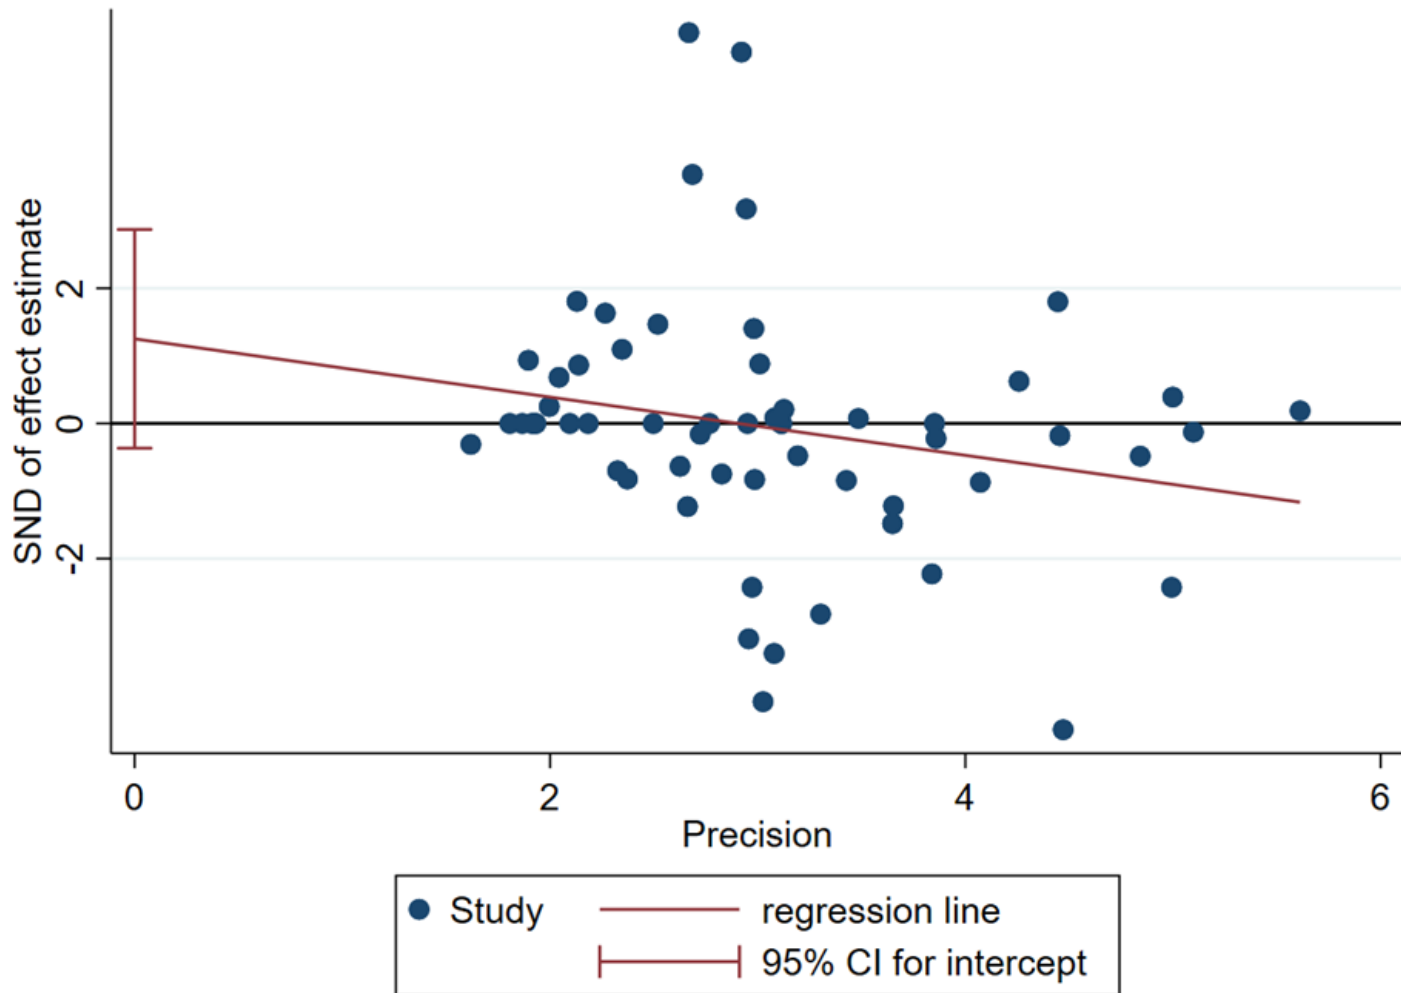

**eFigure 5F Egger's regression of secondary outcome: positive symptoms**

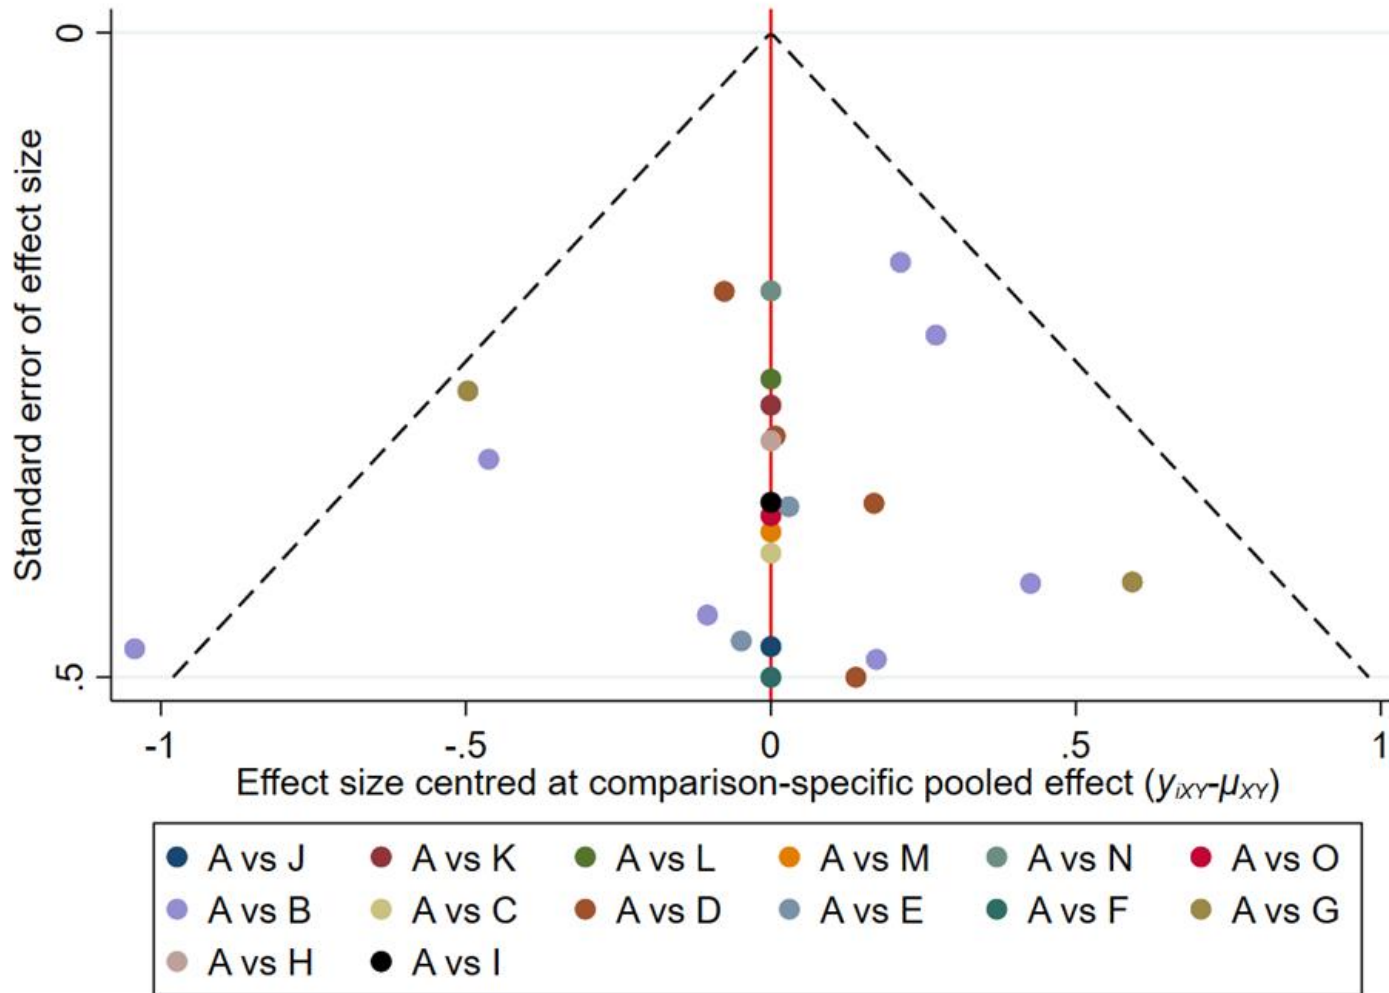

eFigure 5G Funnel plot of secondary outcome: depressive symptoms

Treatments used in eFigure 5G

- A: Sham
- B: hf (10Hz) rTMS at left DLPFC (F3)
- C: extreme hf (20Hz) rTMS at left DLPFC (F3) and right DLPFC (F4)
- D: extreme hf (20Hz) rTMS at left DLPFC (F3)
- E: hf (10Hz) rTMS at left PFC (F3) and right PFC (F4)
- F: tvNS at left auricle
- G: 2 mA Anode tDCS at F3, cathode at F4
- H: Theta-range rTMS at Iz (vermal part of cerebellum)
- I: 1 Hz rTMS at right PFC (F4)
- J: 2 mA Anode tDCS at F3, cathode at Fp2
- K: iTBS at Iz (vermal part of cerebellum)
- L: 2 mA Anode tDCS at F3Fp1, cathode at F4Fp2
- M: 20 Hz deep rTMS at left DLPFC (F3)
- N: 2 mA Anode tDCS at F3, cathode at TP3 (left TPJ)
- O: 2 mA Anode tDCS at F3Fp1, cathode at T3P3 (left TPJ)

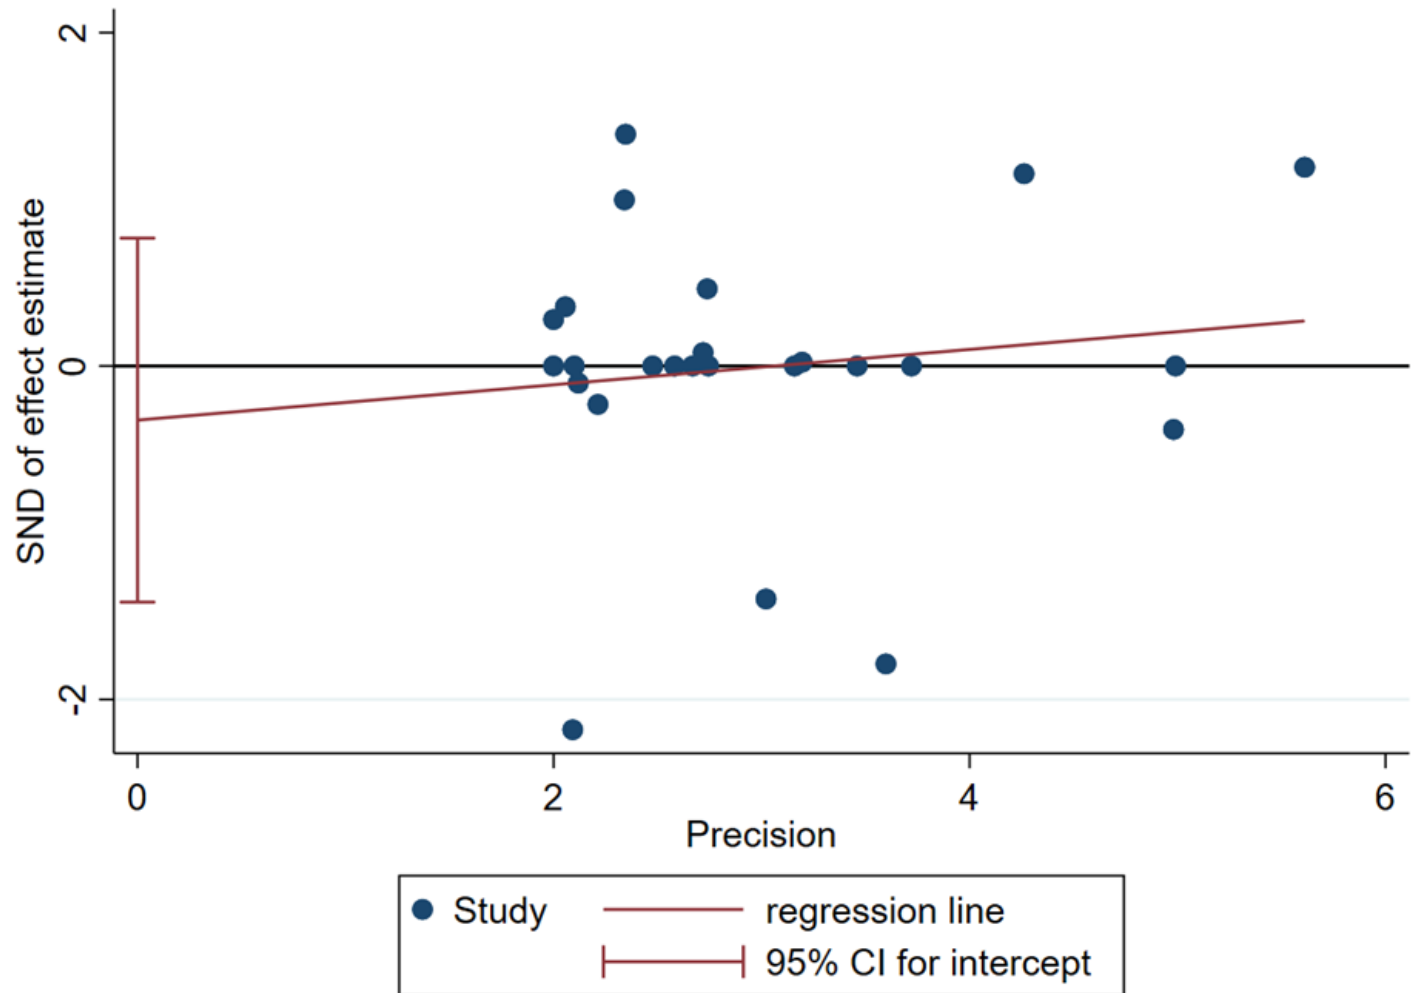

**eFigure 5H Egger's regression of secondary outcome: depressive symptoms**

## Figure legend of eFigure 5A-5H

Abbreviation: 95%CI: 95% confidence interval; a-tDCS-F3 + c-tDCS-F4: 2 mA Anode tDCS at F3, cathode at F4; a-tDCS-F3 + c-tDCS-Fp2: 2 mA Anode tDCS at F3, cathode at Fp2; a-tDCS-F3 + c-tDCS-TP3: 2 mA Anode tDCS at F3, cathode at TP3 (left TPJ); a-tDCS-F3Fp1 + c-tDCS-F4Fp2: 2 mA Anode tDCS at F3Fp1, cathode at F4Fp2; a-tDCS-F3Fp1 + c-tDCS-TP3: 2 mA Anode tDCS at F3Fp1, cathode at T3P3 (left TPJ); a-tDCS-TP3 + c-tDCS-F3Fp1: 2 mA Cathode tDCS at F3Fp1, anode at T3P3 (left TPJ); DLPFC: dorsolateral prefrontal cortex; ehf-dTMS-F3: 20 Hz deep rTMS at left DLPFC (F3); ehf-rTMS-F3: extreme hf (20Hz) rTMS at left DLPFC (F3); ehf-rTMS-F3F4: extreme hf (20Hz) rTMS at left DLPFC (F3) and right DLPFC (F4); hd-a-tDCS-F3 + c-tDCS-AF3F7FC5FC1: High definition 2 mA Anode tDCS at F3, cathode at AF3, F7, FC5, and FC1; hd-tRNS-AF3AF4F2F6FC4: High definition 2 mA Anode tRNS at AF3, cathode at AF4, F2, F6, and FC4; hf-rTMS-F3: hf (10Hz) rTMS at left DLPFC (F3); hf-rTMS-F3F4: hf (10Hz) rTMS at left PFC (F3) and right PFC (F4); iTBS: intermittent theta-burst stimulation; iTBS-F3: iTBS at left DLPFC (F3); iTBS-lz : iTBS at lz (vermal part of cerebellum); lf-dTMS-PT3: 1 Hz deep rTMS at PT3 (left temporo-parietal cortex); lf-rTMS-F4: 1 Hz rTMS at right PFC (F4); lf-rTMS-PT3: 1 Hz rTMS at PT3 (left temporo-parietal cortex); MRI: magnetic resonance imaging; NIBS: noninvasive brain stimulation; NMA: network meta-analysis; OR: odds ratio; PRISMA: Preferred Reporting Items for Systematic Reviews and Meta-Analyses; prTMS-PT3 + lf-rTMS-PT3: 6 Hz priming rTMS at PT3 (left temporo-parietal cortex) + 1 Hz rTMS at PT3; RCT: randomized controlled trial; rTMS: repetitive transcranial magnetic stimulation; SMD: standardized mean difference; SUCRA: surface under the cumulative ranking curve; tACS-F3Fp1-TP3: 2 mA 10Hz tACS at F3Fp1 to T3P3 (TPJ); TBS: theta-burst stimulation; tDCS: transcranial direct current stimulation; the-rTMS-lz : Theta-range rTMS at lz (vermal part of cerebellum); tRNS: transcranial random noise stimulation; tVNS: transcutaneous vegal nerve stimulation; tVNS: tVNS at left auricle; vmPFC: ventromedial prefrontal cortex; VTA: ventral tegmental area

148



## Treatment reference list

| Abbreviation                      | Full name of treatment                                                     |
|-----------------------------------|----------------------------------------------------------------------------|
| Sham                              | Sham control                                                               |
| hf-rTMS-F3                        | hf (10Hz) rTMS at left DLPFC (F3)                                          |
| ehf-rTMS-F3F4                     | extreme hf (20Hz) rTMS at left DLPFC (F3) and right DLPFC (F4)             |
| ehf-rTMS-F3                       | extreme hf (20Hz) rTMS at left DLPFC (F3)                                  |
| hf-rTMS-F3F4                      | hf (10Hz) rTMS at left PFC (F3) and right PFC (F4)                         |
| hd-tRNS-AF3AF4F2F6FC4             | High definition 2 mA Anode tRNS at AF3, cathode at AF4, F2, F6, and FC4    |
| a-tDCS-F3 + c-tDCS-F4             | 2 mA Anode tDCS at F3, cathode at F4                                       |
| hd-a-tDCS-F3 + c-tDCS-AF3F7FC5FC1 | High definition 2 mA Anode tDCS at F3, cathode at AF3, F7, FC5, and FC1    |
| lf-rTMS-PT3                       | 1 Hz rTMS at PT3 (left temporo-parietal cortex)                            |
| prTMS-PT3 + lf-rTMS-PT3           | 6 Hz priming rTMS at PT3 (left temporo-parietal cortex) + 1 Hz rTMS at PT3 |
| iTBS-lz                           | iTBS at lz (vermal part of cerebellum)                                     |
| lf-dTMS-PT3                       | 1 Hz deep rTMS at PT3 (left temporo-parietal cortex)                       |
| ehf-dTMS-F3                       | 20 Hz deep rTMS at left DLPFC (F3)                                         |
| a-tDCS-F3 + c-tDCS-TP3            | 2 mA Anode tDCS at F3, cathode at TP3 (left TPJ)                           |
| iTBS-F3                           | iTBS at left DLPFC (F3)                                                    |
| a-tDCS-F3Fp1 + c-tDCS-TP3         | 2 mA Anode tDCS at F3Fp1, cathode at T3P3 (left TPJ)                       |
| a-tDCS-F3Fp1 + c-tDCS-F4Fp2       | 2 mA Anode tDCS at F3Fp1, cathode at F4Fp2                                 |
| a-tDCS-F3 + c-tDCS-Fp2            | 2 mA Anode tDCS at F3, cathode at Fp2                                      |
| tACS-F3Fp1-TP3                    | 2 mA 10Hz tACS at F3Fp1 to T3P3 (TPJ)                                      |
| a-tDCS-TP3 + c-tDCS-F3Fp1         | 2 mA Cathode tDCS at F3Fp1, anode at T3P3 (left TPJ)                       |
| lf-rTMS-F4                        | 1 Hz rTMS at right PFC (F4)                                                |
| the-rTMS-lz                       | Theta-range rTMS at lz (vermal part of cerebellum)                         |
| tVNS                              | tVNS at left auricle                                                       |





## Figure legend of eFigure 6A-6B

Abbreviation: 95%CI: 95% confidence interval; a-tDCS-F3 + c-tDCS-F4: 2 mA Anode tDCS at F3, cathode at F4; a-tDCS-F3 + c-tDCS-Fp2: 2 mA Anode tDCS at F3, cathode at Fp2; a-tDCS-F3 + c-tDCS-TP3: 2 mA Anode tDCS at F3, cathode at TP3 (left TPJ); a-tDCS-F3Fp1 + c-tDCS-F4Fp2: 2 mA Anode tDCS at F3Fp1, cathode at F4Fp2; a-tDCS-F3Fp1 + c-tDCS-TP3: 2 mA Anode tDCS at F3Fp1, cathode at T3P3 (left TPJ); a-tDCS-TP3 + c-tDCS-F3Fp1: 2 mA Cathode tDCS at F3Fp1, anode at T3P3 (left TPJ); DLPFC: dorsolateral prefrontal cortex; ehf-dTMS-F3: 20 Hz deep rTMS at left DLPFC (F3); ehf-rTMS-F3: extreme hf (20Hz) rTMS at left DLPFC (F3); ehf-rTMS-F3F4: extreme hf (20Hz) rTMS at left DLPFC (F3) and right DLPFC (F4); hd-a-tDCS-F3 + c-tDCS-AF3F7FC5FC1: High definition 2 mA Anode tDCS at F3, cathode at AF3, F7, FC5, and FC1; hd-tRNS-AF3AF4F2F6FC4: High definition 2 mA Anode tRNS at AF3, cathode at AF4, F2, F6, and FC4; hf-rTMS-F3: hf (10Hz) rTMS at left DLPFC (F3); hf-rTMS-F3F4: hf (10Hz) rTMS at left PFC (F3) and right PFC (F4); iTBS: intermittent theta-burst stimulation; iTBS-F3: iTBS at left DLPFC (F3); iTBS-lz : iTBS at lz (vermal part of cerebellum); lf-dTMS-PT3: 1 Hz deep rTMS at PT3 (left temporo-parietal cortex); lf-rTMS-F4: 1 Hz rTMS at right PFC (F4); lf-rTMS-PT3: 1 Hz rTMS at PT3 (left temporo-parietal cortex); MRI: magnetic resonance imaging; NIBS: noninvasive brain stimulation; NMA: network meta-analysis; OR: odds ratio; PRISMA: Preferred Reporting Items for Systematic Reviews and Meta-Analyses; prTMS-PT3 + lf-rTMS-PT3: 6 Hz priming rTMS at PT3 (left temporo-parietal cortex) + 1 Hz rTMS at PT3; RCT: randomized controlled trial; rTMS: repetitive transcranial magnetic stimulation; SMD: standardized mean difference; SUCRA: surface under the cumulative ranking curve; tACS-F3Fp1-TP3: 2 mA 10Hz tACS at F3Fp1 to T3P3 (TPJ); TBS: theta-burst stimulation; tDCS: transcranial direct current stimulation; the-rTMS-lz : Theta-range rTMS at lz (vermal part of cerebellum); tRNS: transcranial random noise stimulation; tVNS: transcutaneous vagal nerve stimulation; tVNS: tVNS at left auricle; vmPFC: ventromedial prefrontal cortex; VTA: ventral tegmental area
